# Supplementary material for: ChIPpeakAnno: a Bioconductor package to annotate ChIP-seq and ChIP-chip data
Source: Springer Nature journal article supplement (doi:10.1186/1471-2105-11-237), 2010-05-11
Supplement: 12859_2009_3694_MOESM6_ESM.pdf [file 12859_2009_3694_MOESM6_ESM.pdf]

Replicate1    Replicate2

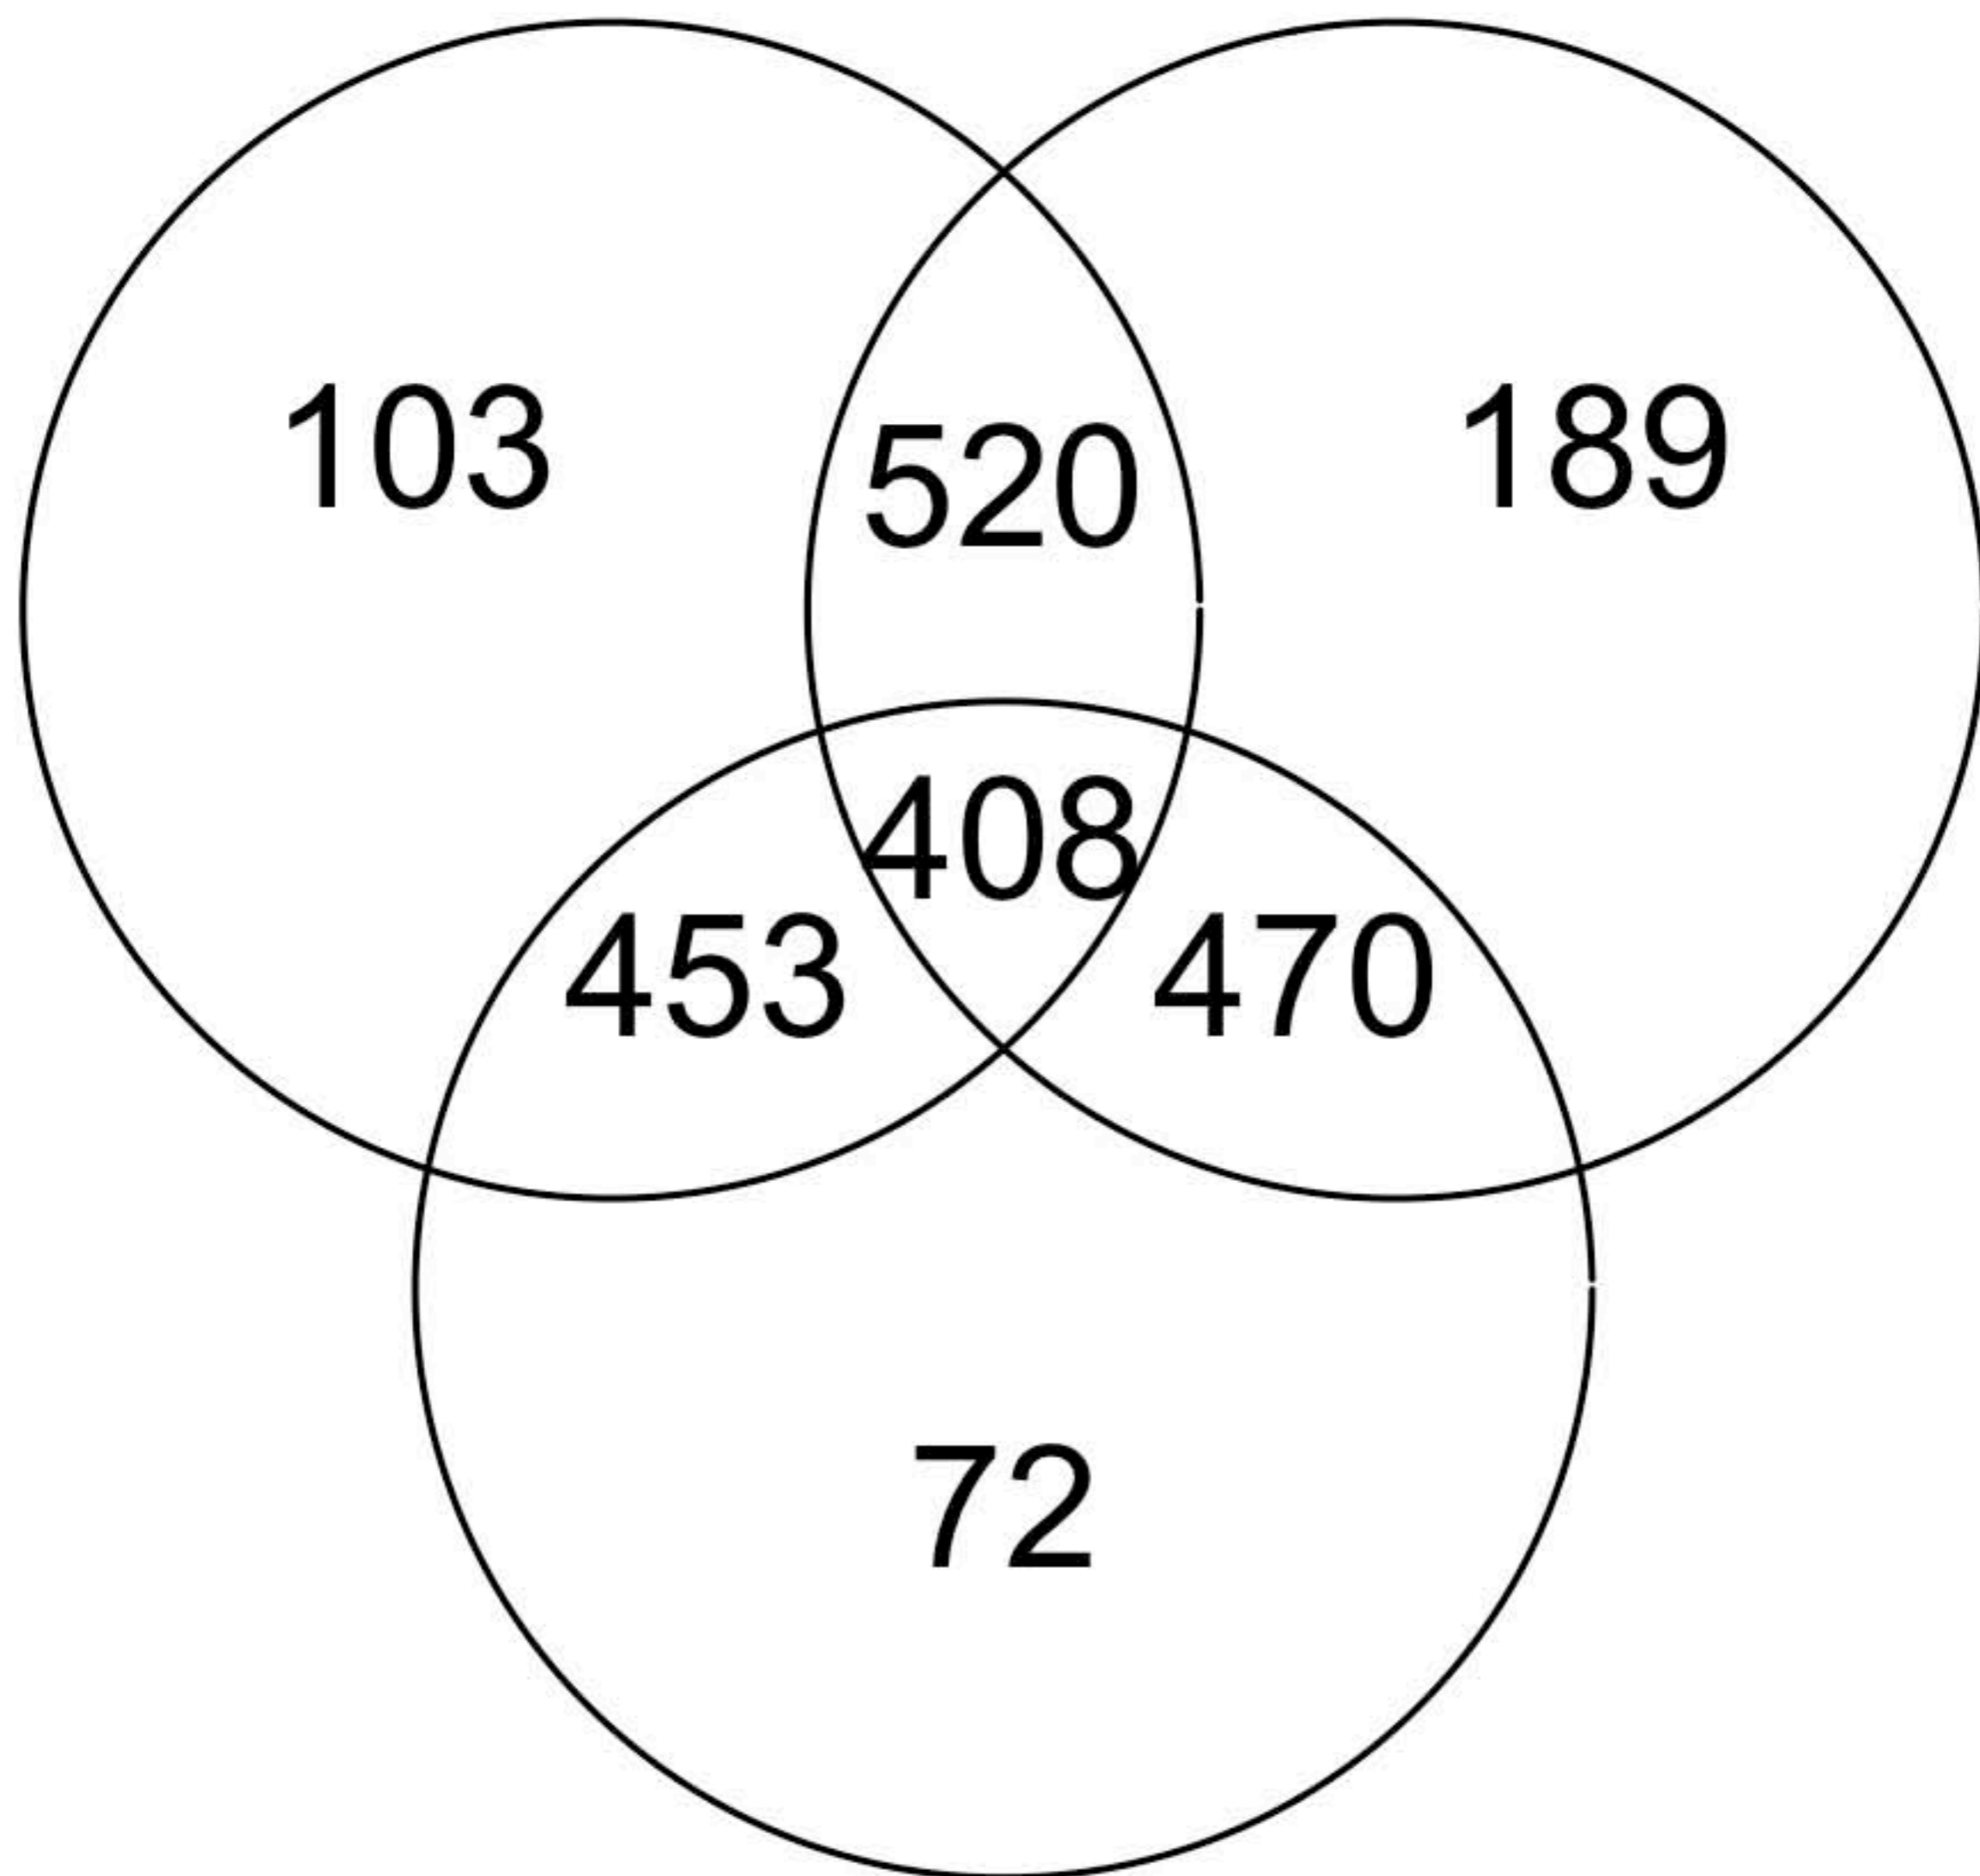

Replicate3

589
