# Supplementary material for: ChIPpeakAnno: a Bioconductor package to annotate ChIP-seq and ChIP-chip data
Source: BMC Bioinformatics. 2010 May 11;11:237. doi: 10.1186/1471-2105-11-237 (PMC3098059; doi:10.1186/1471-2105-11-237)
Supplement: Additional file 3 — Sequence file of Ste12-binding sites used for MEME input. FASTA formatted sequence file from Ste12-binding sites merged from the three biological replicates in yeast [31]. [file 1471-2105-11-237-S3.FA]

>1
AATAGGTAGGAGGAAGAAAAAAAAAAGATGAGGGCAAAAACCCAAGGCCA
AATATGGAAATGTGGCAGAGGGACACACTAATCCGATAGTAAATTTATGT
AACTTGATCATTACAGTGAGAGCAGGCTTGGTAATTTCTTTTTCTTGCCT
GATAATTTTTCACTTTTTCTTTTTTTTTTTCTTGAAAGTTCACAATTTAG
GGTTTGAGCACAGCGTTTGGTTGCGACACTTCCCCAGAAGGAAAACCGGC
CTCTTTGGCTGGGGAGGGAAGAAGGGGGAGGAGAGCTCAGAAAGCCCTAT
CGCGATATGAGGGACCGATCTGTATCAGCATACTTTCGGTATCATCACGG
TCGCAGGATAGAGATAGTGAATGAGTTAGCTGTTTTACAGGCCAAGCGTT
CAAACGAGACGAATGGCGACATTTGCCCGTCAAGAAAACCCGCCGAGTTT
TTTCCTAAACGGGTAAAACAGCCATGCACCGCAGCACGTCGACGAGGTGA
TATTTCCAATTTGGGAAATTTCCCAAATCAGTAATGTAGCCTCTACGGGT
GTCTCTGTCAGCCCCGTGGTCGCCAGCACAGAATGTATCGTACCCCTGAA
GGTAGTTTTTTACCGCCGTGGCACACGATAAAGGTGCACCTTGTGATAAT
AAGGTGGAAAAATATATATGAAAAAGTGAAATTGATTGTGGCTGCACTAG
GACATCATTATTTCTTACTTGGCTATTTACACGTACTTACGCTGGCTGTA
TATCATTTAAGGGGCGGAGGACGAAGAGGACGGACCCGAGATCATCCGGT
CCAAGAAACGGGTCATCCGGTCCTTAGCATTGTCTAGACTATCTAGGGCA
GGACGGACATCCACGTGGAAAGTAGGCATTCCGTTTTCGTCGTCGGGCCC
TCCGTAGAAATCCAAGACGTATCTAACTTCCTTGAAGGTTGGAGGTTGTT
GTTCCGCTTTGCGCTCGCCTCGGAGTACAATCCAGTCGTGCCTGTCGAAT
GGTAGTTCTTGGCTAAAATGGGACGGAAACAGTAGGCCGCACAGGTGCAT
CCAGCGAGCACGAGGGCTCAATACGCCCGGTTTCCCCATGAATTTCAGCA
ACTTAGGCTGCACGTGGCTTTCATCTGTGTGCGGTTTTTCCCATTCGAGC
ACTTCCTGCCAGCACCCTTCATTTAGAAAGTTGTGGACCTGCACCATGGA
CTCCACTGCATCTTCGGCGACTTCGCCGCTACCGCCAATCTTGCCCTTTC
TAACCATAGCATTGTACATCTGTTGTGGAGAAGGATACTCCCAGAACTCG
TTACTGTCTGGACTCTTGGGGATGCTGGAGATGGTCCGATCAACGGGCAA
GTCCATCTTTTGGCCAGGCTGTTTGGATGCTGCCAACTCCGGCATATTGT
TCAGCGGGTTTATTCTATCGTTATCTCCCTGCATAACGGGGCACTCAGAG
GATGGTGGCGACGACGACGACGACTCGTGCATGACTGGGCACCCTGACAT
GGATGATACTGCTGCCCCACCAATATCTTTGCCCGTAGTTTTTTGATCTG
CCCAAAACCAACCCATTTTTTGTAGTTTCTGTTGTATTTGCTCTGCTTTA
TTCGTGCTACTCGTATGTGTATGCTATCTTATTAGCTGCCTATTTCATTT
CTCTTAGTATTCGCATTTAAAGCTGAGAAATTTTTTGATAATCATTTCCC
GATGAAAAGAAAAAAGGGAAAAAGTCGATAAAAAGAGGTAAGCGAAAAGA
AAAAGAAAAAATAGAAAATTTGGGTGGGGGGGGCGGAAGATCCCACGCCG
CGCAAGAGATATTTCAATATTACTACTACATAGTATATGCGGCGCTACCA
TACGTACAACTTTTTTTTCTTTTTTTTTTTTTTTGCCTTCTAAATTTGTA
ATTCGGTCACACTTTTGTCGCAGTGTTGCAAACGTCTTGAAAGAATTGTA
GGTGTTGTAAACCACAACTTGCTCCCTTGAAAGCGTTGCTGATTATTTCC
TTTGAACCTGTTGCATTGTTGTATTGTTGTATTGCTGCTGATGTTTTAGG
CACTTAGTATTAGATATTCCTAAGCCTCCCTCACCATAAATTACCTTTAT
TACTTGCATGACTATTATTAGCAGAGCATGTAGTATGGGACTCAAGACCG
ATATGATACACACCAAAGACGTAGGCACCGGCGATTAAATCAAAGGCTCC
GATAGCCGAAAAGTGAGAAGAAAAAAAAAGGAAAAAAAGGAATTGTCCTA
ATGAGCGGTGTGGCCGACTTGCCATAATATCAGTTAGGGCTACT
>2
CAAAAGATGGAGTGGTTCTGTTACCTTGATCGTTGGCAATAATGTCCACA
CGATCATTAGCAAAGTGAGCAACACACGAGTATGTTGTACCTAAATCAAT
ACCGACAGCTTTTGACATATTATCTGTTATTTACTTGAATTTTTGTTTCT
TGTAATACTTGATTACTTTTCTTTTGATGTGCTTATCTTACAAATAGAGA
AAATAAAACAACTTAAGTAAGAATTGGGAAACGAAACTACAACTCAATCC
CTTCTCGAAGATACATCAATCCACCCCTTATATAACCTTGAAGTCCTCGA
AACGATCAGCTAATCTAAATGGCCCCCCTTCTTTTTGGGTTCTTTCTCTC
CCTTTTGCCGCCGATGGAACGTTCTGGAAAAAGAAGAATAATTTAATTAC
TTTCTCAACTAAAATCTGGAGAAAAAACGCAAATGACAGCTTCTAAACGT
TCCGTGTGCTTTCTTTCTAGAATGTTCTGGAAAGTTTACAACAATCCACA
AGAACGAAAATGCCGTTGACAATGATGAAACCATCATCCACACACCGCGC
ACACGTGCTTTATTTCTTTTTCTGAATTTTTTTTTTCCGCCATTTTCAAC
CAAGGAAATTTTTTTTCTTAGGGCTCAGAACCTGCAGGTGAAGAAGCGCT
TTAGAAATCAAAGCACAACGTAACAATTTGTCGACAACCGAGCCTTTGAA
GAAAAAATTTTTCACATTGTCGCCTCTAAATAAATAGTTTAAGGTTATCT
ACCCACTATATTTAGTTGGTTCTTTTTTTTTTCCTTCTACTCTTTATCTT
TTTACCTCATGCTTT
>3
TGTAGGCCTATTATTAATGATATCTGAATAATCCTCTATTAGGGTTGGAT
CATTCAGTAGCGCGTGCGATTGAAAGGAGTCCATGCCCGACGTCGACGTG
ATTAGCGAAGGCGCGTAACCATTGTCATGTCTAGCAGCTATAGAACTAAC
CTCCTTGACACCACTTGCGGAAGTCTCATCAACATGCTCTTCCTTATTAC
TCATTCTCTTACCAAGCAGAGAATGTTATCTAAAAACTACGTGTATTTCA
CCTCTTTCTCGACTTGAACACGTCCAACTCCTTAAGTACTACCACAGCCA
GGAAAGAATGGATCCAGTTCTACACGATAGCAAAGCAGAAAACACAACCA
GCGTACCCCTGTAGAAGCTTCTTTGTTTACAGCACTTGATCCATGTAGCC
ATACTCGAAATTTCAACTCATCTGAAACTTTTCCTGAAGGTTGAAAAAGA
ATGCCATAAGGGTCACCCGAAGCTTATTCACGAGTCAGTCTGACTCTTGC
GAGAGATGAGGATGTAATAATACTAATCTCGAAGATGCCATCTAATACAT
ATAG
>4
AATTGATCCAAATGTAAATAAACAATCACAAGGAAAAAAAAAAAAAAAAA
AAAAATAGCCGCCATGACCCCGGATCGTCGGTTGTGATACGGTCAGGGTA
GCGCCCTGGTCAAACTTCAGAACTAAAAAAATAATAAGGAAGAAAAAAAT
AGCTAATTTTTCCGGCAGAAAGATTTTCGCTACCCGAAAGTTTTTCCGGC
AAGCTAAATGGAAAAAGGAAAGATTATTGAAAGAGAAAGAAAGAAAAAAA
AAAAATGTACACCCAGACATCGGGCTTCCACAATTTCGGCTCTATTGTTT
TCCATCTCTCGCAACGGCGGGATTCCTCTATGGCGTGTGATGTCTGTATC
TGTTACTTAATCCAGAAACTGGCACTTGACCCAACTCTGCCACGTGGGTC
GTTTTGCCATCGACAGATTGGGAGATTTTCATAGTAGAATTCAGCATGAT
AGCTACGTAAATGTGTTCCGCACCGTCACAAAGTGTTTTCTACTGTTCTT
TCTTCTTTCGTTCATTCAGTTGAGTTGAG
>5
AAAAATTCTAGAACACTATAGTTGCATTTTTTGGGCCGGAAGAAGAAAAA
CGCATGTAACTTTAATGTCAAATAAAGTTTTCACCTAGTAAGCGCGATAC
AAAAAAAACACAGAAATAGCCATAGGAAAGTGAATTTTGTCAGCCGACTA
AAATTAAGGTTAGCTTACAAAGCAGCAAAAAATTTGACATCGCACGGTAT
TCCCTGAAAAAGGAGCAGGCAGGTGCTGTATATTTTTTTCGGTTCCTGCC
TCTTACATGGCGTCGGTGTATCTTAAATACTAAAGTGAGCTGACTACCCT
TTTGAGTGCCCTATGTGACCTCTGATCTCGAAAGTAAACAAGAGA
>6
TATATCACTACTTGTACAAATATCATATTGTACGATAATCGCGAAGAACG
ACGCACTGGTGGGAAGAAGTGGAAAACAGAAGCTTTAAGGTAGAAACAGA
ACAAGAATGTGGCTATGGTAGGATAGCAAAAGAGTACCATTGCTGTTATC
ATTTGTTGCCTAGCCCTATCAAGACCTGTCTGCTAATCCAACCCGAGAGA
TCATGGCGATCCAAACCCGTTTTGCCTCGGGCACATCTTTATCCGATTTG
AAACCAAAACCAAGTGCAACTTCCATCTCCATA
>150
AAAGAGCTTCCAGAACAAAATATAAATAAATAAAAAAAACTTCTCTTCAG
GCAAGAGTACGTTCTTCGCTGGTTTCCTACAGAATCAAAAGAGTACTGCA
GCTTATTGTACACACTTACAATATTCAAAACATGTGTGGCCTACTCGGTT
CCTGGCAAGGTTAAGCCAAGTGGTGTAGTTACCAGAAAAAAGTGAACACA
TACAAGATACGATGCGTAAGTACATAAGGTATGACAGCCTGTAACAAATC
CACGTTAGATTTATATCTTCTAGGCTGAGAATCTGGCAGGTTTTAGCAAA
ACATATATAACTTGCTCTCATTAAGCGGGCTCACTGCTTAAGCGATTGTT
ACCTGGAACTACAGGCAAGTACAATAGCCTCCTCCAGCTTTTGACTCTGA
AAAAAAGGTAACGAAAGAAACTTTTCACACAGATAGGAACTATTCTAATA
TTACAGTAAAGCCAGCTATGGAATAACAGGTGGCATGTGCCCACTGTATT
CATGTATGAGCGGCCTTTTTTTTCCACGAAAACAGATATGATGATGTTTT
AGGCCAAAATGGTGAGATCCTTTTACAGGAAGATTTTACGCCAACTCTTT
CCATTTAGTGACACAGGTGAGGGTCTTTTATCGGCGCAAGGTGTTTCAGA
TGAGCCATTTTGCCCGTAGTCCGGTTTAATCAGCCTCATTGGAATTCCCC
GGCACCGCTCGCATTCCGCGTACGACTCAAAGAATTTCCCATTGAATTCG
GGAATGTGCGTGTTTCAGATTGCGTTTGCTTATTATTCTGGGAAACTCTC
CGGAAACAAGCTGAGCTGGACTCCACGAATGGTCCCTCACAAGGCTCTTG
GCTCATGCACAGTTAAAAAGCACCTGTAGCTACCATCAGCAATCCATGGT
GCTGGAGTTTCTCTCGATGGTACGGCCCATAGCTGGAGAAAATAGCTTAT
TACCAAAAAAGTAATTCCCCCGCAGAGGTATATATTAAGTTTGAAACAAA
AGGCTTGCTTAATTTTTTACATATGACAACCCTTTTCTTACTTTTATAAA
TGTTTATGAAACAGGAGATTCTTCGACTGGTGCCAGATTCCTCCCATATC
GACAAGAAGAATAATCCACCTATTTCAACAATTCTGATACCTGTTTAACC
ATGAGTCTTAAAGAAGACGACTTTGGCAAGGATAATTCTAGAAATATAGA
ATCATATACTGGTAGAATTTTTGACGTATATATACAAAAAGATTCGTATT
CACAGTCGGCCTTGGATGATATGTTTCCAGAAGCCGTAGTTTCAACCGCC
GCTTGTGTGAAAAATGAAGCGGAGGATAACATCAATCTCATAGACACGCA
TCCTCAATTCGAACTGGTAAATACTGGACTGGGTGCTAAATCGGACGATT
TGAAATCTCCATCAGCAAAGGCTACGTTCACTGACAAGCAGAGGAAGAAT

>151
TATCTGATTTCACTTTACACCAATCTTCCTTGCTGACATTTATTCCCAAC
TTGTTCTTCAGCCGCTTGTTTTATAACGTACATTATTGTAAAAACGGAGT
AGAAAGGGAAAAAGGGAAAGGGATGGACGTGGCTAATGCGCATCTTCGTT
TGTGTGTATATCCTTTGATCTTCACTACATAATTTGTTACCCGACAATGC
TTTTTTTTTTTTCTCAATTTTCATCTCTTTTCTTTTTCCTCATTTCTTAT
GAAAATCAGTGTGACTAAAATGAGACTTCGTATTTTTTGTAGAGGCACCA
TACGCCGGCTCCGCCGTCACCACATTCTCCCCTGCCGGTAAAGACCGGCG
CACGCGGAAAAGGCGTACATAGCGTCGGGCGGTAACGGAGTCATTCCATC
GCTGATAATTACCCCTTGCAGCAAACCCAGAGCCCTATTACGAATCTAGC
CCATACACCGCGTTAGAGCACTCGCCGTTTTGCTCCGGGTCGTGCCGTCG
TACATGCATACGCGTCCTGCAGGCATACCATAAGCCCACATACAATCACC
TGTAGAAAGAAACAAAGCTTGTGTATGTAATCAAAGCAGAAATCTGATGG
GTTCGAACGACTTCGTTATAGAAATATTATCTTTGGGTCTCGTCCTGCGT
TATTCCTCCTGTCTCCTGCCGCTTTGATAACCTTTTCATTCCTCCCCTTA
ACTTGTTATTTCGTGTTACGATATTGGGTAACTTAGTAGCGTAAATGGTA
AAATGTAGGGACTCAATCTCATAGGTGGTTATGTTTTTCGTTCTCATTTT
TCAAATCTGTGACTTCACAGACAAAACGCGTAGTGATTTCTTTATCTGAA
TGAGCCTTCGAAAAAAAAAACAACGATTTCTTATGCAGTTAGTCGGCCAG
TTGGTTATTGACTATCTGTGCGATTCCCCTTCCTGCATAAAAATAAACAC
AATCTTAATACGCCATACGTTGACTCCATTTTTTGCTCGTTTCATTATAT
TATCTTCCCATGCCGCTCCTGCGTGGGATTCCCTTTATTATAACTTTTAA
GGTTTCTACCCACATATATGCAAT
>152
TCCATATTCACCTGTTACCCAGAGGGCACCATTCATATCATTATCAACGT
AAAATCTGCGAATTACCGTAAACCGCAAAAAAAAAAGGATGGCGGGCAGT
ATCATCCTTCACGACCCGGGTGGCTCGTGCGCCCTCCGGAAAAAGAAATG
AAATGGAGTGCAAAAACGGGAAAGACGCGCCACCGTTTCTGGCCCACGCG
CTCATTCTCAGTGGCCAGGCACTAGAGACAGGACTGAAACCGCGTTACCA
CAACAAACAAAGGCAACGTGCAGTAAACAACCATCCCTCCTGGGATCGAA
ATCAAAAGTACAAACCTCAGATCGAACTGAAAAATTTTCGGTAGCGTGCT
TGAGCCGGTATAAATATTCAATGTCAAACACCTACGACTTTCGCAATCAA
CGGACCTCTCTTGCATTTTTGTATTTAATATGTGAAGATCTTTCCTCTGC
ATTTTCTTTCCTTCTTTATCTTTCTTGGCTTTTCACCCTTTCTCTTCTTT

>153
CTAGAACCTTCTTTACGTGATTCTCGCTCGGAATCCGTCAATAGAATGTT
TTCAGTCTCCGTTTCAATATTCTGCGCACATCAATCATTTTCTTACTACA
TACACTAACATTACTCCTAGTTTAATTTAATTGAATTTTTAACTTTCTTT
TCTTTTCATTTGGCAATTTGGCTCCTTGAAAACAAGACTATGGGTCTCTC
TCATAAGCCTCAGGGGGGGACCCCAAAAAAATAACGCGGCCATCTTGCAT
GCACCGTTGAACCTGTAGCTTACAGTAAGCCACAATTCTCTTACCTTCTT
GGCAATGTGGCACAAAATAATCTGGTTATGTGTCTTCATTTGGTAATCAC
TGGGATGTTACTGGGGCAGCAGCAACTCCGTGTGTACCCCTAACTCCGTG
TGTACCCCTAAAGAACCTTGCCTGTCAAGGTGCATTGTTGGATCGGAATA
GTAACCGTCTTTACATGAACATCCACAACCAACGAAAGTGCTTTTTCAAG
CATTGCTTGATTTCTAGAAAGATCGATGGTTATTCCCTCCCCCTTATGCG
TCCAAAAATATAGGGTGCTCGTAACAGTAAGGTATTCGCACTTAGCGTGC
TCGCAACACAAAATTAAGTAATATGCGAGTTTTAGATGTCCTTGCGGATC
TATGCACGTTCTTGAGTGGTATTTCATAACAACGGTTCTTTTTCACCCTT
ATTCCTAAACATATAAATAGGACCTCCATTAGTTAGAGATCTGTTTTTAA
TCCATTCACCTTTCATTCTACTCTCTTA
>154
TCATCTGCTCTAGTGTTTAAATACAAACATTCAATTTCCAACAACGTCTA
ACAAAGCTCGATTCAAATTAAGAAGCAGGAAAAAGCAAAACATCTGCGTG
TCTTATCTCAATGGCTTGCGCTAACTGCGAACAGAGTGCCCTATGAAATA
GGGGAATGAACGCATATTGGTTTCATTATAGAGCGTCAATCAAGAAAGAG
GCACCAAACTATAAACGCACATTTCTCGGTAGGGCTAGGAACGCTTTCCT
GCTTATCTTATCTGAAGCTTATTTATTGTTCGTTTTTTTATCTTATCTGA
TAAGGGGAAAAAGCCTGGAAAAGCGCGTAAATGATGAGGCGAAATGCAGC
CAAAGATGCGTGCCGTTGCAGTTAGCTAACAACCTGGCGTTCGGCGATCG
CCATAAGAGATCTGCCAATTTTAAAAAGGGTATTGCCAATACACATAGTA
GCCTTATCTGCAGCAAGCCATAGGACTAATGTGTTCGACGTCGTTGGGGA
AAAAAAGCAAAGAACATGTTGCCTTTGAGGAGACTGCAGCAAGAAAAAAA
GTTCAATAAGGATTGCAAAAAAAAAAAGAAGCTCGCACTCAGGATCGAAC
TAAGGACCAACAGATTTGCAATCTGCTGCGCTACCACTGCGCCATACGAG
CTTTCTATTACATGTGGGAAGACTAATATAGATAGTATAGT
>155
ACTTGGTGCCGGAAACTCATTTGAGCTGTCATAATATGATAAATATTTAT
ATGTAAAAATTTAGGCCAGATAATATATAAAAGATAAACGATTTAAAGAG
GGTGTAGGATTTGCCTGTTAGCGATGTAGGAGCTACTGCACGATGTAGCA
TGTAATAGCCAGACGTGATTCCCCTAAACTCAGGCCCTTCTCCAAGGAGA
ATGCAACGGTAGGCAGTTCGTTTGAAATTGAAACTTTTCTCAACGACAAT
GATGTCCCGCAGCATAAGAAAACATGAGATCAGAAAAGCGTTGCAAAACG
CAGAAGCCACTTATCAAGAGCTACGGCTGCGCGTTTTTCTGGGACGTGCT
GACAAACGAGAAAAAAGATGGCTTTGTATTCAGTTCAAGGCCCTGTGTAT
TTTTTTCCTTCAAGAAATTTTTATTTTGGCCTGGGGTCTTTAAACGGACG
GGTGCCCTGAGAGTACTCTCGCATAATCCAGGGATGGCTTTTTCACAGTC
GTTTAACATTCGTTTATGAAGTAAAGAAAAAAAATACCAAACCCCGTTAA
AAGAGAAAAAAGGTAGCCGAACATT
>156
TAGTGCTTGTAGTCCGCACAGGCGGATACTTTTTAGTTTGGGAAGAGTTA
ACTGGAGAGGGCAGTTTACTTTCACATACTCTTTTATCTTTCTGAAGTAA
AATGTGATGTACCTACAAGCAATGCATAAGCTCTTGAGTTTTAGATCTGT
TTCACCCTGGAACTCAAAATTCTTTTACTCGAAATTTTTACTTTTTTTTT
TTTTGTTTCTGCATTCTCTCAGATTTTAGATGATGCGGTTTTTTACAGGG
CATTGAAACAATTGCAGAAAAGCAACATACTAATATATCATAACTTTTTA
CTCTTGCCTCTCAGAAACTATATATACGTTGTAATCATTTTCTTTCTTCT
AATAGCTAGTTCGTTTGAACTACAAGGAAATAAGGCAGAGAAAAAGAAAG
GAAAATAATATGCCAAAGAGAATTGTATACAATATATCCAGTGACTTCCA
GTTGAAGTCGTTACTGGGAGAGGGTGCATACGGTGTGGTATGTTCTGCA
>157
ATATTGACCTATAAACCCAAAATGTGAAAGAAATTTGATAGGTCAAGATC
AATGTAAACAATTACTTTGTTATGTAGAGTTTTTTTAGCTACCTATATTC
CACCATAACATCAATCATGCGGTTGCTGGTGTATTTACCAATAATGTTTA
ATGTATATATATATATATATATATGGGGCCGTATACTTACATATAGTAGA
TGTCAAGCGTAGGCGCTTCCCCTGCCGGCTGTGAGGGCGCCATAACCAAG
GTATCTATAGACCGCCAATCAGCAAACTACCTCCGTACATTCATGTTGCA
CCCACACATTTATACACCCAGACCGCGACAAATTACCCATAAGGTTGTTT
GTGACGGCGTCGTACAAGAGAACGTGGGAACTTTTTAGGCTCACCAAAAA
AGAAAGAAAAAATACGAGTTGCTGACAGAAGCCTCAAGAAAAAAAAAATT
CTTCTTCGACTATGCTGGAGGCAGAGATGATCGAGCCGGTAGTTAACTAT
ATATAGCTAAATTGGTTCCATCACCTTCTTTTCTGGTGTCGCTCCTTCTA
GTGCTATTTCTGGCTTTTCCTATTTTTTTTTTTCCATTTTTCTTTCTCTC
TTTCT
>158
AACAAATAGTAGCTCGCGTGGCGTAATGGCAACGCGTCTGACTTCTAATC
AGAAGATTATGGGTTCGACCCCCATCGTGAGTGCTTTGTTTCTTCCGTGA
TAGTTTAATGGTCAGAATGGGCGCTTGTCGCGTGCCAGATCGGGGTTCAA
TTCCCCGTCGCGGAGATTTTTTTGGCTACTCCTGCAGTTATTCTTCTGCC
TCCTTAGTACAGTGTAATGCTCCTCAGAATTTTTGCCAAACAGAGAACCA
GTCATTGATCGTTGATTACATATACTAGCTATGCGTTGAACTTCAAAAAT
TTAAATAGGCTTCACCCCAGAAATGATGTTAATGACAATAGTAATTAACC
TACAGATAGACTAGAAATGAAAAAGGTACGGTTAACGTTGACGCTCCCTC
GACAAGTTAGGTCAAATATGAACCACAACTGAAATATATGCGGGATATAC
CCGCGCTTGCGTGCATGTAACTAAGCAAAAATTCTCCATACTGTTCGAGG
AAAAAAATGTTCATGAATCTCCCCTGAATAAATTAAATTAAGGTTTACGA
TTCGAGTTGTTTGGAAAAAAAAAAAAAGGTTCCCCTGTACTGT
>159
GTTTGCAGATGGCCTATTATATACCCTGCTTATATAACTCTGAGAATTAG
GAATATTTTGCTGTTGCTATGGTAATTAACATATTTCCAACAATAATGAC
CTTCTCGAGCTATTGTCTTCCTTGCAGTGGCGAAGAAACCACCGGAGAGT
TGCAACGAACTGCCTTTCTTAGGAAGTGCGCGGGCTCTCTATTATGATAG
GCCGATACGGTACAAAAGCTTAAAGTTGCCTTTGTATTACCTTTTTTAAT
CGCAGCAAACAATGCGAAGCACAGGTGTTCACTTTCCTTAGCTTCCCCTT
TTCCGTGCTTTTGTTTATACTTCGTACAAAAATGAGGGGAAGGTACCAGG
CAGGATACCTCACTGATTACGACGACAAGGAAAAGAGTAAAAATAATTTA
CTGTAAAACTTCCAAATTTGTCTGAGAGCAACAGAATAGAAGCACAAAGA
AATGTACCCTACGAGAGACAGAGAGGGTAAAAGAGTAAGTAAATTCTAAA
GTGGTGTGAATGTCATAACTTAAACTATTACCCACGGGATACCTGCTAGG
TCAACGTAGCCGCTACTCGAATATAATAAGCGCTTCTTGTATATTTTCTC
AATAACAGGCGAGGCCCCTTCTACCCTTGAATGCTACTTATTACTCACTC
ATAATACATTGTATAAGCCTTCGTGTTTTTCACGGCCTCGAAAAAATTTT
TCTTAACTAATTTACCCAGAAAGGAAATTTCCTTATAAGGAAAATAAATG
CA
>160
CTTTACTGGAAATAGCTCGAAGAATTGGAGAGAAAAAAAGATGCTTTTAG
AAAATAAGACACATTTCCCGGAACAATCAATTATTTCCATCACAATCTTT
GAAAGAAAGGGCCAAACCGCCGCAATAACTGCCGTAGGATTCAAAACCAC
AAGTACATTCTTCAACGGAAAAGAGTCGGAAAATCGGAAAAGGGACCTCC
CGAAGACATTAGTCTCATAATTAAGGTTATAGTCAAGAAAAACCATAACC
AGATCGTCTGATGCTCTTTTTGGGAATATTGATTACCCAATAAGGTCATT
ACTCCAATTTGTTGGGCTCCATTGTGTTGAGTATCGGTTGCTTGGGTTTT
GAAAATCTTGCTGCCGTCCGGCTGCATGTGTGCGCCGCAAGTGCCGAGAA
AGTAATTATCAATGTGGATCGCAAGCCAAGACAATAAATTTGTTGTTTCT
GTGACTATTTCATGATGGCCTCCTAGTCAAAATACCAAGAAGAAGAAAGG
TTTTTTTTTCTTTTTTTCCCTACCTGGCCATTCAAAGGTGAAATATCCTT
TCCATTACCCAAAGAGGTAGTACTGTTTAGGCGGGGTTTGACAGGCGCTG
GAAGGGATAGGCAAGAATAGGAACGGTTTCCAAAGCCATAGAAATTCCTC
CTTCACGTTCTGTTGAAGGGAGGATAAAGCAAAATTTGAAACAATAACGA
CATTGTGCGGGTATGTATGCTACGGATGATTAATGAATGTATGTAAAAAA
AATATAAAATTACAGAAACGAATAAGGTCATTAAGGGAGGGGAGGGCACA
AGCAAATGTGCTTGTGAAGTCATACCTACTCAGCGCTAAGGACATGCCGT
GATATCATCAACCGGCTCTAATGGGAAGTGTCCAGACCTGAGTGGTGTAG
TTAAGTTTAACACCAGAAATGATAAGCTTTTCTCATCAAAGACATATTCC
TTAGTTTT
>161
AGCGTGAAAATCTTCATGGCATTTCTACAAATTCTTTTTAGTTAGTATCG
CCAACCATTAACCTTTTTAGTAATGCTGACGTTAAACGAAGGCGAAAAAA
AATACTTGGCAACACCATCGTTTATATTTTTTTCAAATGGAAGTGTCGGC
CGACGTAGCATAGCAGGAAAGATTCAAAGGCAAGGGTTTCACATAACGTT
ACCCTTCTGACCACGCCCCTTCTTTCGATCCCACTAGTGCGGACGGATTA
TCACGCAAGTTTTTTAACGCGAGACATCGGAAAATATTTATGCCGATTAG
ATCCGGCCCCTGAAACTTTTTGTTTGATACTTTCAAACGCACTACTCTAC
CCCATGACATAAAAAATATCTGTCTCCGGTTATATA
>162
AATACGTTTAGAAGAAGACATGTTTTTTTGGATGCTTGTTTATGTATGTA
CTCTATAGTCAGTGAAATTTATTTACTTGTGGCGATAGTGATTTTCCTGG
CTTCTTTACTTTATTTTTTTTCAGGATAGATTTATTCTCTGGATTATTTA
TTAAGATGAAAAATAAGAATAAAGAAAAAGAAAGAAGGATGAAGAAAAAA
GAAAAATACAGGCCAAGGCCTTTCAAGGTGAGCTGTTGCCAGGTTTTTCC
GCAGCGGGAAAAATCTCGCAGACCATGTGACCGCCGGTACTCCTTTTCCT
GTTGCTCGGCCATTTGATCCTCGCTTCGAGAAAAACTATAACAATTGATT
AGTGCGGAGAGGAGGATAGGCGGTAAGATCAGTTTTGTTTATTGTATAAA
TGAGATACTTTGGAATAAGGACATTAGCCTTATGTTACATCATTTCTTAT
CACGTAAGACTACTTAT
>163
GAAGCGAACCTCATAGAATTTTCTATACAGAAGAGACCTTTCCGCGCATA
TACGCGGTAGCGTGTGTCAGCATCAGAGGTTTAGCATAATATATTGCAGA
AAATGTGCTAGTAATATGTCTCTCTGTTGTCAATGGGCTTACAATTGCCG
GCCATCAGTATATGGAGTATCAATGTTCCTTTTGATCGCCAACAAATACT
ACCTTTTATCCTGCTCTTCCTGCTCTCAGATATTAATGCCGAATTGTTTC
ATCTTGTCTGTGTAGAAGACCACACACGAAAATCCTGTGATTTTTCATTT
TACTTATCATTAATCGAATGTATATCTATTTAATCTGCTTTTCTTGTCTA
ATAAATATATATGTAAAGTACGCTTTTTGTTGAAATTTTTTAAACCTTTG
TTTATTTTTTTTTCTTCATTCCGTAACTCTTCTACCTTCTTTATTTACTT
TCTAAAATCCAAATACAAAACATAAAAATAAATAAACACAGAGTAAATTC
CCAAATTATTCCATCATTAAAAAATACGAGGCGCGTGTAAGTTACAGAC
>164
TATAGCGATGACTTAGAGAACAAAGTAGTATTAGTATCATATACTTCCAA
CGTTAATCAAGCGCAATAAACCTTTGTTCGTGTGTTTCAAAGTTATTGCA
AGAGCGAAGTTGAAGCCATCTTTTCACGAGAAGTTAGCTGTGGTTCGAGT
CTGTCGCACGCCGTGTAATGTAAGGATCTTCCCTTAGCTTTTCTGATCCG
GAGCCCTTGAGGGATATTACGCATCGCGTATCTTCATACGATTACTGTAC
TTTGCTGACTTGCATTCTTGATATTGGGCTATAGTTGGCACTTCGCTCGT
TTCTTTTCTTTCGTTATATAACGTAACCTTTTTTTTTTTAACTTCCTTAT
CCTGCCCCTTATCACTCTGAACCCCATAGATAAACAAAGACAGAACTCTG
TCCTACTTTATCTATTACTAAACTCAACACATTACAGCCCAATATTATAA
ATACGTTCTTCTTCGTTACAAGAATAGGCGAGGTTGTACGAACTGCAAAC
TAGCTGCAAATTAATTGTAACACTTAAGTGGAGAGCAGAGAGTAGCAGCA
CTGAAGGAAAAGGGAGAAGCTTATCTTACTGTAGAAGAAAATGGGATTGC
GTTACTCCATATATATTGAAAATCCGTTATCTTCCCCATCA
>165
TCAAAAAGAGGAAAAAGGAATATGGATAACATGTATGCGCGCACTGACGT
AACTGCACGTACTTCAGAAGCAACATATATTCAACAAAACTAAGCAAGAA
GATATTATTAGCTGTAACTATATCACATTTAGACTTACCCCTATCGTTCA
TACTTCCCACTGCAACCCTAGTTGTAGTTCTGCTAATAGTCGGCCAATCT
TGAACATGTACTGTAAGGCCCAAAAGGGCTCCAGGGATGCCCTTCTACAA
AGCATTTCACATGCTAATAAAAGCCCCGTTACATAATAACATCTCCCGCC
CACAAAAGCGTTTGATCCTGTTTTTCTATTTGCTTCCATAAAAAATCGGA
TCACATTTCCTTTTCTTCCGCCTTAGATCTGCACCGAGATCTTTTGCGCT
CTATTTTACCCCTAGAAACTGGACCCGGCCTAGAATCTTTCACTGCCACC
AGAGAGTTTTAGCCTCGCTCTCTTTTAATTTGCTGAAAAAGGGTTTCCTG
ATAGAAGCCGCGGTTAATAGAAAAACGGCAAAAAAGTTATGGTCGGTATG
TTCTACCCCCCT
>166
ATTGTTGAAGGTATTATTGGTTTGAGAAAGCTACTCCTCAAAAATGTCAC
TTGATAATATGGAATTATAATGTCGTTATATTTTCAATCATTTCAATACA
ATATGGTAAACCGAAATCCAAAAACTTTACAATATCTCTTATCTATTGTT
ATTCGACATTCTTCCCGGGCCTTAACGGCTTCTTAACTAATATTACCCTA
AACGGACAAATGGCGAAGGGCCCCATTCATTTACGAACAGGAAAAAAAGA
AAGTGACAATACAGCCATAATTTGATGTACCATCTTAATCAGCATATGTT
TTCACTAATATACTAAACCCATATGGATGCACGTTGAAAGCACTGTG
>167
TTTTTTCTCTCTTTAGTAATTGTTTCTATATATGGCTTATCAATTCTATA
TATTTTTTAACTTGAATATATGAATGACATCTTTAATAATCACATCTCGG
CAAACGACTGATGAGTTCCACCTGCTTATTGTTTATTTCCTTTCGTACAC
GCCGCGCTTGGCCAGTCCTTCCAAGAATGTAGGCAGAAGAAATCAAACTA
ACTTGTAAGAGAAAGAATAAAATTCATTATACATATAGGTAAAATAATAT
AAATACAACGGCTC
>168
AAAAAATACATTCCAAGAATAAATACCAGGATTTCGTGACAAAAATTAAA
AAAAAGGGAAGTATGGCATGCCTAGAAATCTTTTCTGGAAAACTTGAAGC
ATATCATATAATTGTATGAACTTGTCCTTCAAAAGATGTTACCAAATATT
CAAGAGTATGTGAGCTTTCTATTCTATTGACGCGTAAGAAAGGCTATCAC
GTGTGGGGGGGAGAGCTCAGCCACATTGCACTACTTTCGAAACCGCGTAG
TCGGAAACGACATTCCCCCGTACCAAAACAAACGAAAGGACGTGAAAGGT
AAATGAATAACATGGCACTAAAAATTTGGCAGAAAACGAAA
>169
AACCTAAAGTAGCAAATTTAAAAAAATAAAGAGTTTGATCCAACCGAGGT
TCGAACTCGGGATCTTCGCCGTGTAAAGGCGACGTCTTGAACCACTGGAC
CATTGGACCCGGAACTCGATACTATGTCATTTTTGGATATCGGTTAGTTG
TATACATTGGATATCTCATCTAAAAGCATTACGCATGCCCTATAACTGGT
AAATTCAATGAATGTTTTGTAAGTTGAGG
>170
TGGCATGAAGAATTGTACTGATATCACATTGTGTTGAGCACTGATAGATT
AATACTATATTTCTGCTAGGTGCGGGGGGTAACATGTCCTAATGTGTGGC
AACCACATTCTAAGGCTCGGTAAGTGATGCGATATATGTGCATGTGTGGC
TTTCTTCCTAATTTGCTATTAGATGATTGTGTGCAAATCCACAGAAATAT
ACAATTTCGA
>171
CAACGGAAACAAGTGCACGCAACATGTTATTTTCCTGTTATCCGCCCTGA
GCAGTTTTCTTCCCCGGGTGGCAACCATTCTCCAACATTAGACAAACTTT
ACAAAGAAGACACCCTACCCGGTTGCCTCCAAAGCCCTTCTTTCTTAACG
CGAGTACCGCTTTGGGAGGCCTCATCTTGGTTGTGTCCTCGTATGGCAGC
ATCTGCCATTGAGCGAACCCTTTCCCGTTTTACGCGCATGGCCTAGACCG
ATCTTTAGCAGACATGCCGAGTGAATTTACCTAAGATTTCTAAGGACTCT
TCTGCATGTTTCCGAAAATCACCGGAAAAACCTTCGGTTTTTTTAGACGA
AAACTAGGAAGTTGCTTAGCTTTCCTTGTCGTCTTCAAATCTATATGCCA
TCGGAAGAGAATCAGAAGAGAAGATCACGACTTAAGAGCTTTGCTGTTAA
GATAGCAAGAAAGCTTGCCAATAGGCAGTTATGTAACCTAGTTTATCTAC
ACCTTCTTTGATTAACTTAGCTATGTAGGCCGGTGTGTTTGTTCATATCA
CGGCATACGTTAACACAATGTAAATCTTGCTTTGGGTTGACTGAGGGAAA
TAACTATAGACATCACACCAATGGCTAAGGGATATTTCGACCTCGCTATG
GGTTCTAAATGAGGGAATGGAAAAAAAGGGTAAATTGAAAACAACCTACC
GATTTTGGTACCACTTCCGTGATTTTCGATTCTTCAATTTCCGCATAATT
TGCCTCAAATAGGAAATCTGAGCTGTTTTTTTCTTACCCTCGAGTGGTCG
TTCTGCGGACTTTTCTCCGGTCCAATGCATGAATCCCTTTAAGAAGCATG
AAGAAAAAAAAAAATAGCCTCTTGTAAAAGCAAAAATGCCTTTCACTATT
TCTGTGTAAACGAATAATTTCGTCATCTTAGTAGTTCACTGG
>172
TTCTGCTTTCTGTTTGTTGTTTTTTTTCTCATAGTTGTTTTGATTTTACT
CTGTTGGAAATGCGAAAATTGTTTTGATTTTACCCGATTGCGACCTATTC
CCGGCTTTCCCAAAAAAGGAATTCCTGTCCAATGCAACGACAGCCATAGA
AACAGCCGCGGTTGGGTGCGTGGGTGCGGTAATTTAACGATCATATGGTA
TGGGTGCACGTGGGATTCTAGGGGAAGTGCGCGCGGATACCGAATCGGCC
ATCGAACCGGCCACCCGGATTGAGTTTGGTATGTTGCCTCTTTGCGCAAT
TTTATTGAATGCAAAGTTTCTCCTTCTAGTAAAGGACAACAGCTGAAAAA
TGCTCGATGTCCAAATGACGACATAAACCTCCTCGTTTAGGAAAGAGTTA
ACACGCCTAGTTTCAGCTTGTTTCTTTTTATTGTGTAATTAGTTTTCTTA
CTTAGTACATCTTATTGACCCCACTGTCATCGGATGTGAGAGAGTGGTTC
ACTTCTGAATTAAGTTTAGAGATATACTAAATCTAAATAAAAGTCTCTTT
CTGCGTGCATATGTTTTCTTGCGCGGGACTCACAAGGAT
>173
AAATAGTTTTTGGGATATATCTTGTGATCAAATGCTTTGCAAAAGGGTAA
AACAGCGTTTACAATAGGATAGCCAAAAGTAAAAAAAAAAAAAAAAAAAA
AAAGAAGGAAGTTAGTATCGAGCTCAAACAATTTTAGTTTTGCTGGACAT
ATTTTCAGTTTCATTACTGTATATTTGCAGCTTGGTTTTTGTCGCTCTGT
AGTCTTGTTTCACACTTCGTCATTTCCGAGTTTCATCTTGCGACATAACT
TGTTTCAACTTTTCAAGTGCGACTTTTTGTTAAATATTATGACATAGAAG
AAAGTAGAACAGCCATTATAAAACAAAAGAGAAGTGAGAATACTATTAAG
ATGGCATTCCAAGATCCAACTTACGACCAGAATAAAAGCAGACACATCAA
CAACAGTCACTTGCAAGGGCCAAACCAGGAAACAATAGAAATGAAATCTA
AACACGTATCATTCAAACCCTCTAGAGACTTCCATACAAACGATTACTCG
AA
>174
TCATGAATATGAAGATAAATGTGGCACCAAACGGCAACGCGGAAGACCGT
AGGATCCAATCATATAACCCCTATTATTCTAACATCATTGCTGTTGGGTA
CAACATTCTACGCCGCTATTACTACGTGCTGCTTCTTTTGATTCTCTGCT
TTCTTTACCGTCATGCACGTGCGCCGCGAAAAGTATTAATCATGCGGACA
CTCTGGCATTTAGGGGATACTGTCAAAAAGACTATGCTCAATACTGTCAT
ATTCATATGCACGTTCTTTTTTTAATTTATCTTGGCAAAACGTGGGGCTG
GAACTTTTGAAACGCACTGCAACATCTGTGGCTGTACAGTCAAGAAAAGT
AAGTACTCATCGTCATGCTCTAATGTGTATATGGTATTTGTGGTGCAGAC
ACCATTAGAAGTATAGTTCACGAAATGATGACACGATAGCATGTGCTTTT
CGACGGCTGATAACCTTGTATTCTCTTATTTTTGTATTCTTTTCGTAAGC
GGCATTTGTTTGCAGAACCTTATCGCAGATATCGATAAACATTTGTTGAC
AATTCTTTTTCGCTCCCCTTCTTTTTGTTTATCTTCGTTATATTCAATAG
TCTACATACACTAACCGTTGAATTGTTGCAAACAAATA
>175
AACTTGTCCTTGCCATAGCAGAAAGGGATGATGAAATAACGAAGATGAGC
TAATTTGGTATTCGAATAAACATGCAGGATGTGGCGGAAGGGATCGGAAT
AAGAGTCGGGATCGGGATCGGGATATGGCTTTGCTTACTTTAGCCATACC
AAATATTCTTACAAAGCACGCTTTCGATGCGTTTTTGCCTTCTGAGAGAA
TCCTCCTACGGCTCGACCCTTGAAAAATTCTAGAGGATCTGGAAAATGGC
CAACAAAATCGCGCAGGGAGACGCAAGGAAAGTAAGTCAGATGGATCCGA
CTGTATGTAACAAGGGTTGCTGCAGCGGTTTTCCATCCCTTTCGGCACCC
TGCACAAGTAGTTATTCTTACTTATGCAAAACGGATATGAGCTACATAGC
GTTCATTTTTTAGGTTTTCAGAAGCTATTACAACGCAGTAAAAAGGATAC
ACAACTTTCTTACGGGGAAGAAGAATACGGCTCAATGCACCCACTTCAAC
CCCCGGTATCACGCGGCACTAAAGTTGTTTGATTGTAATAGTAATACTGC
TG
>176
TTGCAAAAAAAAACTGCTCCTGAGTACACTTGTTTTACGTCGGAAAGATA
AATGCCGTACCATTTCTGCCAGTAGCGACACCACACATTGTAAAAACAAT
GTGGGGCGAGCCGGGACTCGAACCCGGGACCTCCCGCACCCTAAGCGAGA
ATCATACCTCTAGACCACACGCCCTCCTTTGAAAAATCCCGGCAGAACAG
CGCCTGAAGTCTGGGATACAGCCCTATTTTCCCTGCCATCGTCATTGACC
TTTTTCTTAACGACCAGATTAACAGCCAGTTATTGAAAGTTTGCGAACGT
GAAGTAAAACTGCAAAATGGTCGTTTTAAGTCAAAAGTAACCCTGCGTCA
CACATGAGAAACATTATCGCTAAGTTGTTGTTACTACTTCTTGTAATTAA
CTTACTGTCGCATTCCAAATGGACTGCGAAACAGACACGAAACAATTACG
AAAGTGACGACAGAGTAAATATTGTCATTAAAGAGAATGATGACCTCCGG
GTAAACTGTGAGAATAAGTCTAGACCATTCGTTAAACTTCATCTTTAATT
GA
>177
GCATAATAGGCATTTGCAAGAATTACTCGTGAGTAAGGAAAGAGTGAGGA
ACTATCGCATACCTGCATTTAAAGATGCCGATTTGGGCGCGAATCCTTTA
TTTTGGCTTCACCCTCATACTATTATCAGGGCCAGAAAAAGGAAGTGTTT
CCCTCCTTCTTGAATTGATGTTACCCTCATAAAGCACGTGGCCTCTTATC
GAGAAAGAAATTACCGTCGCTCGTGATTTGTTTGCAAAAAGAACAAAACT
GAAAAAACCCAGACACGCTCGACTTCCTGTCTTCCTATTGATTGCAGCTT
CCAATTTCGTCACACAACAAGGTCCTAGCGACGGCTCACAGGTTTTGTAA
CAAGCAATCGAAGGTTCTGGAATGGCGGGAAAGGGTTTAGTACCACATGC
TATGATGCCCACTGTGATCTCCAGAGCAAAGTTCGTTCGATCGTACTGTT
ACTCTCTCTCTTTCAAACAGAATTGTCCGAATCGTGTGACAACAACAGCC
TGTTCTCACACACTCTTTTCTTCTAACCAAGGGGGTGGTTTAGTTTA
>178
CTATCCTTTGTTTACGTATTTGTTTATATATATAACTTTATTTTTTTTTA
TTAATTGGGCTGCAAGACAATTTTGTTGTCAGTGATGCCTCAATCCTTCT
TTTGCTTCCATATTTACCATGTGGACCCTTTCAAAACAGAGTTGTATCTC
TGCAGGATGCCCTTTTTGACGTATTGAATGGCATAATTGCACTGTCACTT
TTCGCGCTGTCTCATTTTGGTGCGATGATGAAACAAACATGAAACGTCTG
TAATTTGAAACAAATAACGTAATTCTCGGGATTGGTTTTATTTAAATGAC
AATGTAAGAGTGGCTTTGTAAGGTATGTGTTGCTCTTAAAATATTTGGAT
ACGACATCCTTTATCTTTTTTCCTTTAAGAGCAGGATATAAGCCATCAAG
TTTCTGAAAATCAAAATGGTAGCAACAATAATGCAGACGACAACAACTGT
GCTGACGACAGTCGCCGCAATGTCTACTACCTTAGCATCAAA
>179
TGGTGATATTACTCTCTGGGATTCGATGTGTTCTCATCATCTGAAGGGTT
TCCTATGTGTTGAAAGCCTATCCCACTAGACGGAGCCGCGCGCCAGCCGG
GCGGATCCGAGACATCTTAGTCAGCTGAGACAAGAAAGGCACAGCTCTCG
GACAGGAACTGCTGTCATATGAAAACCTAAAAATGTTTCCTGGAAATTCC
ATGACTGCGCAAAGTTTGATACGTTTATTGTTCTTCTCTACTACCGCACT
TTCTATCTCGGAAACCTTTCAACTGAATGA
>180
CTAGGGCTCAAAATTGCTAAGTAAGGGCTTGACAGATGTAACATAATACG
AAATAAACTGGATATCGTTTAATAATTATCAAGGTGATTTAAATCGTAAA
TACATAGGCTGGGCCATATACACTAACATGTGTCGTGACCAATGTGCAGC
AGATAGACTTGCTCATTAAATATATTCCAGGTAGGATTCTCTAAG
>181
CTTGCTGTAGGTTATGGGAATATCGTGTAAGCTGGGGTGACTTTTGAGCT
ATTCGCGACGCCCGACGCCGTAATAACTACTTTCGACAGACCACTTATGA
CAGTATTTCAGGCCGCTCTTATAAAATGACATGTTAACAAACAGTTCTGA
TTATTCGCCTTTTGACAGGACGATAATGTAAATAGTTGTGGTAGTATCAT
TCAGGTATGTAACTGTTTACTTTGTATCGCTTGAAAAAAATAAGCATTTC
AGAGCCTTCTTTGGAGCTCAAGTGGATTGAGGCCACAGCAAGACCGGCCA
GTTTGAATGCTCAACTCTTCAAAAGAAATTCCTCAAATATGTCCAGTTTC
ATGTACTGTCCGGTGTGATTTATTATTTTTTATTTACTTTGTAGTTCTTA
AAGCTAAGATTTTTTTCTTTGATAAATTCTTGTTTTCATATCCTAAAATT
AAAGGGAAAATAAACAATACATAACAAAACATATAA
>182
ACTTATTTAGGGATCCGCTCTAGTTTACTGTGATACAACTGAAAAACATT
ACAAAGCTATCGCGCCTGCATTCTCATATTAGTGGCGTATGTTTGTGTCA
CATTCGATACTTCTACATAATACAATGACTGAACCCTTACCGCTGGCACA
GGAATACCGCGCCGCGAAAGCAGGGTCTAGGAGAAACAATAGAATTCTTG
GCGATGAGAGAGGGGAAGGCTTTAATAAAAAAAAATAGCGCTTATCCGAT
TCTGTTGGAATAAGTGGCTATC
>183
ATATTGTATACCCATTTGCTCTCCATTGTCTGCAAGCCAAAATCTGCATA
CAGATCCGAGACATCTCTTGGATTTTTTTCAATGAAGGCACGGAGGGCAT
CTGAATAATCTCAATGAGTAAGAAACGAAATTTTTTAAGGAACATTTTCA
ATTTGCCTACGGACTATTCTCTGCAAAGTTCCAATAATTTCTCCTTTTTT
TCCAGCGTTTAAAGGAAAAAAACTGGTTTTCGATGCCGGGGCCCCACAAT
GTACCTGCACTTTTTGTGGGGTAAACGTGGATAAAACGAATCTCCGTTGC
CTAAAAAACATTTTTTTTCGTACGGTCCCCTCTGCGTTCAGGAAAAAAAG
AGATCGGGTGGTGAGGCTAGGTAGCGTAGCCCCTTGGAGAAGCATATGAA
ACATTTGTCTTGGCGCCGCACACAGGAACTGCGCACTTCTTTTTGTCCTA
GGTTGCTTATCACACCATATGGTGCACCCGTGCTCGTTGTCACTGCCTTT
TTTTAACAATTCTTCCTTTGTTCCTCTGAAAGCACGGGCCGGCGCACTCC
AATTACCCCTACATTAATTTCCAAGTAGTAGCAGGGGGATGAACATGTGA
ACATGTTGCAACAACTGCGGTGTCTTCTTAGGCTTGTGTTCGGAATTTCT
TCCTCCTGTTTCGGTGTGTGTTGCTTATTTTTTCCTTGCCCCTTTGCGGC
ATCACAGCAGCCGTTGTTCCGTATTCCGGCTGATAAGCATGGAAAGATTT
TCCAACAATACTCATGAAAAAATGTGTTGGTGTCTGAGTAAGCTAAATTT
TCCCAAATTTGATGCCATTCAACCCGAAAACTTAAAATGTAAAAGGGGTT
GAGATAGTGCAGCTGTGTGGCAAAAGTCAAAAAAAATCTGTTCCTTTCAA
GGAAATGAAAAAAGGAAGGAAAAAATGTCCAGGACAGAAAGGCCATCCCC
TTAGTAAAGAAACCTGCTTAGAGATTCTTGAGGCTCGAAAATGGTTGGTG
GTTGGACTTCTTTTGAGTTTTCCGTCCGGATTTCAAACGAAATCCATCAT
CACGTTCCTAGCAACAAGAGGATTATTGGACGATTGTCGGGAGTAAAGAT
TACTCAGTTGGTTTTCTAACTCTACTGCGCACTTCTTCGTGGGTATAACA
AATTGCACACACATACATTCTTATTATTTGATACTGCTTACGATAACCG
>184
GCGTATATATATATATTTATCCTTGTTATTTTTGTAAATTGAGCTATGCA
ACATAAGATTCCTGCGATGTAAGAACTACTTGCTAATCAAGAGAACTTCA
ACAATTTTCCATCGCAGAGACGAAAAAACTGGAAAAAAATAAAAAGAAAA
AATTGAAAAAGAATCGCGACTTCCGATTACATAACCTTATACGGAGTATG
ATACCATTCTTGACATCATCAACACACCATCGCAGACCCACGTGGCCGCT
TCGTGTGCCTTGAAAATACAGCCTTAAACGCAATCTCATTCGCGTTCTGT
GGAAATTGTCTCGGACTACACGCTGGGCGTGCATCACCAGTGAAAATGCC
GTACCGCCCCGCTTCCGGTTTTGTTTTTATAAATCCGACTGGAGAAATAG
ACTTCTGGGTTTACACCCCGGAATAATACTAAAACCAAAACTGGTAAATA
GGGCTACAGATGAGCAGGAAAACGTTGCCGGAAAAAGTTTATTTATCCGA
GAGAATAATTGATGAAGAAGTAGCGGTATGCACAGTAGCGGCGGAAGTAT
TAGCAATTTTTACTCTGGTGTGCACAAGAGTGTTCATCATTTTTTTCACG
GCTAGGATATGCCATGGAATATGGCCATCTTCGCCATCAGAGAGACCGTA
CCACACGTTTAGAGCAGCCAGGTTGCGAAACTCTTCTAAGATGGTTTCCA
GCAATTGTGTACTATCAGAATGTGGACAGTTTAAAAGGTTGACTGCGAAT
TTGTCCCAAACCGTATCACCGTCGCATTTTTTGAATTTGATCAAAGCACC
ACTCCTAATAGCACAGCGATGCTG
>185
ATTCTTTCAGTTGCCAATAAGTTACAGGGGATCTCGAAAGATGGTGGGGA
TTTTTCCTTGAAAGACGACTTTTTGCCATCTAATTTTTCCTTGTTGCCTC
TGAAAATTATCCAGCAGAAGCAAATGTAAAAGATGAACCTCAGAAGAACA
CGCAGGGGCCCGAAATTGTTCCTACGAGAAGTAGTGGGTCATAAAAAGTT
TATTCCCTGGAAAAAAAATTTTGCGTTGCCTTTCTGGAGAATTTTTTCGA
ATTAGCGTGCTGCCACTGCATGCATTTCTGAGAAGTGTGGGCATTCTTCC
ACCAGTTGTTCCTCCTAAAAAAAAAAAAGATTTCCTACCCCGCACAAATT
CCTGCATACCCCTCATTTCCACGGGGTAAAAAAAAAACATCCCGTAGCAG
CCTCTGACGGAGCCGTATGGAACAATCCTGGATAAATATGGCGGAAAAAC
GGCTCTGGCTGCGGCTTTGTTTAAGGCAGAAACTAGATGAGATGTTTGTT
GTTACGGAAAAAAAAATTTGTTGCGCTTTCTGTAGTGGGATTTGTCCTCA
TAACTTCTCCATGAAGGGGCCATTAAAATCTAGCCCTCTAGTAAAGCGTT
ATGGGAGCACTCTTGCGGCGTTCAACGGTGCTGCTTTTTCAC
>186
AATTTTTTTTAATTTGGGTTTGGAAAGTTCTCTTCCTTATATATGAATAA
CGGAAAAGGAGCCTGCAGCCAGACTGTAGAAAGATGACACTGCCAAGAGA
ATAATTAAAAGAAAAAACACCCCAAACACCCTGACCGGCGGCGAAGCCCC
TCTGCGCGCTCAACGCGTTTCGTTTCACGCTTAAGGGTCCTCAAGAGGCC
ATAGTCTTTTACCGATAAGAAAAATCTAGACCCAATGAATTTTTCCCTTC
TTTTCCGGTGCGGCCTTTTCACTGCTAAACAGTAAAAAGCATTTCTTGGC
TTTCCCTGAGGGTGTTGACCGCAACCAAGCCAATACTTCATTTTGCTTTT
TCCTCTTTTAGAAAACAGAGTTTTCCCTGTCTCAAACGTTTCAAAGACAA
ATATGCGGAAAATCAACTTATAAGTAGAAAAATACTAGCGATTTTTCTAG
TTAGAATATTTAGGGGAACTATGCGAAGACAAACGGTGAAGTCAAAAGAA
ACACACTGCCTCGATTAGAAAGGCTTATCTGCCACAGTTTAATTTTTTTT
TAATTTTATTTCTTTTTTTTTTATTTAACTAGAATCTGGCTAAAAATAAG
CAACGGTCCGTGTAGATTACTGTTTCGAACGAGGAACAACTGAAGGAAAA
GTTTTTTATTTTCCGCGAAGTTCGTATATTTTAGTTTTCTTTTACTCCAA
GGGTTCGTGACGTCGAATTCCTATCAGCTTTTTTTTGCGCTTGGCGTTCT
AGGTCCCTGTGCCCGTCTGAAACTATTCGTACATAGCATTACTAGAGTAC
ATAATATCGTCTACCATACATACGACGGGTAGCCAGATTTTGTGCCGGAT
TGTCGGGGAAAAGACGGCAAATGAGCTCATACGTAATGGTGCGATTTTGA
TTCTTAGCTTTCTATTTCTGGAGAAAAGTACTCCAAGGTG
>187
TTAGGTTTTAGGATGAAACTTTTTCTCCCACAATCCTTATTTGTTATGAC
ACCAGAGTGCCTAATTCAATCGAAAAACAGATAAGGGGAATTTCTGGAAT
TAGGGTGACAGAATGAGCTACGTAAAATTAACGGCAATGCGAAGGGCATC
TTCATATTATTTTTCTCACCTTGCTGCTATTCTAATTGCATTTCCGTTAT
TAAGGTTTGCCCCTTCTCCGAAGGTAAGCTGCGGAATTTCCTGATAAGTG
CATTACCCCGCATAAGGTTCCCCTTACGATACCAGAAAAGGAATCAGTGT
CGATCGTATTTTCGGCATGTGGATTATCCTTGCACCTGTTCTCCGGAGAA
ATGTTGGTTTTTTTCTGTAAGGGGTATGTGGTGAGGAGGTAAGCCATTAT
CATCGTTGCCTTCATTATATCTTTTTATTGCTGGCCGATCTCTGATATTA
TGATGAATATTATGAAAAGT
>188
CTTTTTTTCTTCGGCTTTGCAAGGTTAATTAATTAACATCTACCAGTTTT
ACTACATTTTAGATTGGTTCGTCCACCGAAATTTAAAAAAGCAGGATTGA
AAGCGTACAACAACGTCTTAGCGAAAAAGATAATCCAAAATTCGATGCTT
GTACACCTCATGTAGCTTCCTTATTAACATTTGGTAGTAGGCTTAGGCTA
TTTTTTGAAAAAGCCGTCATATATTACTTTGAGCCTTTGCGAATCCTCTC
CAAAGTGTCGGTTACCTACCGGGAGGGATAACCGCGGATAGCCGTCATTT
ACCGAAAATTGCCGAGGTCATGCTGAGCATTTGTCGTACTTTTGTGCGGC
GGAGCTTTGATACCTTCGGTAAGTGTCGGTATGTAATAGGTTAGTGGCAT
CTTATTTATTGTGTTGAGTAAAGTTTAAGATATAAACTGGGCTAGTTTGC
ATCGTCACTACAGCGGCAGCTCACTTTCATTTTTTTTCTGCGTTTATTAA
TACTACATAAAATCTGATATAAAACATATTTAACTGATCAACCCTCTCAA
CTTGATACTCAAAACAAGTTGACGCGACTTCTGTAAAGTTTATTTACAAG
ATAACAAAGAAACTCCCTTAAGCATGGCACCTGTTACAATTGAAAAGTTC
GTAAATCAAGAAGAACGACACCTTGTTTCCAACCGATCAGCAACAATTCC
GTTTGGTGAATACATATTTAAAAGATTGTTGTCCATCGATACGAAATCAG
TTTTCGGTGTTCCTGGTGACTTCAACTTATCTCTATTAGAATATCTCTAT
TCACCTAGTGT
>189
GTAAGTCGGGCCCAATAAACTTGTTGAAAGGGTGAGAGAGAAAGTGCTAA
AAGGAAGCCAAACCTTTGTGAAACCTGGGGTATGTCGAGCATATAATCAA
AAATAAGACGTACTACTCAAAAAGGAAATGCATGGGAAAAAGAGGCAGCG
AAAAAGGAAAAGTGAGTGCCCATCTATTTTTAGGCGCTGTTCCGTTCAGG
GATCGTACTTGTTTCATATCAGTGGTAGCAACGTGGTAGCACGGAAGAAT
TTGACAAGGAGCTAAACGTCATATCGCCAAGGAACGGTTTTTCGTTTCAA
GGTCGTTGGAGAGCTTTTCCATGATCGGTATGGAGCTTAAATAAAGGGAA
AGGAACAATGATACGTTTATGCTTATTCGGCAAATAGAAAACATGTTTAA
TACAGAAAATGCAGTAATATTATATGGGAAGAATCAAGACTCTTGCCTTC
CACCTCTTTAGAGTAAATTCTTATATAGGGCTGAACATATACACACTATA
CCGATAGAAAGGTTATAATTTAAAGGGAAAAATGCACATAAAGAATACTA
CTTAATTTTGATTTTTGGTTCTGGTGCCGTTGTTTTTATTTTTTCTCGTC
TTTTATCTCTTTTAAACAATAACGTATCTGATTGGA
>190
ATAAACATTCATCTGTGTGATCCAGATCAAACAAATAAACAATGAGTAAA
CGAAAAATCTGGCTGAAATGTCTCATGCTATTAACCCAATTCAGCATTGA
TATTAAAAATACCGACGTATCCCTGCACGGAAAGCGCGTCTGATGTTTAC
CATTCCGGGTTTTTGGCGCGCGTCATGTCCAAATTAGGACGTGGTTTATA
GCCGAAAGAGGAAATGTGATCTGCCCACCTGTGCGGCCCTTCTCTGAGCG
TTTCGAGCAGGATGCATAATATGCTCCCTTCGTACGGTAGAGGACAAATA
TGACCATTACCCGACTATTGAGGACATATGTCGTTATTAGAATTTAGCAC
CTTTAAAGTTATATTGCA
>191
GTCTGGGCTGATGTTTACGCTAAGGCTTTGGAAGGTAAGGACTTGAAGGA
AATCCTATCTGGTTTCCATAACGCTGGCCCTGTTGCTGGTGCTGGTGCTG
CTTCTGGCGCTGCCGCTGCTGGTGGTGACGCTGCTGCTGAAGAAGAAAAA
GAAGAAGAAGCTGCTGAAGAATCTGACGACGACATGGGTTTCGGTTTATT
CGACTAAACATACAAGGAAAGTCATTTTTTCTGCAACGTTTTTTTACCCT
TTATGTATATATATTTACATATAAAATAAACCTCTAATCAATCAGTATTT
AAAAATCGGAAGTAATGTCCATACGAAAGGGCTACGAGAATTTAACCATC
TCGTTCTTTGCTAGAAATGGCACTGCGGGATAGCCCCTGGTTGCGGGATA
TCAGACCTGTCGTCACCATAGCAACCAAAAATTACATAAACCCATGGTTG
CTCGCCCTTTGATGGCGACGCCGACCGAAGCTTCTCCCGCGCACATTTTT
AAAATTTTTACTCATCGGGAATGAAAGGTTCTTTGACACATGTAAAGCTC
CCTAAGTTGGACATACGTCGGTCCTTACAGGCTTAGCAATACACCTATAA
GGCACTAGAAACGTATAAAATTTGAGCACTTTAGTTTCTCATCCCTTTTG
ATACGAAACGCGGGCAAGGCTACGGCATACAGGAATTTAACATTTTGTTG
GCTATGGAGCTAAGAAGTAGACGGAGCGCAGAGGCCTATCTTGTCACGCC
TGAGGAACCTGCCAAGAAT
>192
GTTTTTAATTTACACGGCGAAGATAGAAAAAGAGAAGGACGAAATTTAAA
GCGGTCAAGAAGCAGCGACGATCGTAACTATATTGTCAAATTTGATTTTG
ATAAAGCAACAGGTCAACTCCGCGATATAATTGATCTGAAACCTGATACT
GCTAATATTGCCTCATTTCCAACATTATCAACAAGCAGCAGCAGTTGCTC
ACAAGTGTTTAACAATATTGACTCCAATGATAATCCATTACCAAATGCGG
AGGGAAAGGAGGAGATAATTTATGATAGTGAAGGTTAATAGTAAAATAAA
AAAACCGAAAACCGAAAACAATAAAAAATGGAAAAACGACAACATTCCAC
CCAACAACTACAAAGAAAAGTTAAGGGTAATTTTACCTATTTAGGATTTT
AATCTGTTGGAGTTAAGGTGAATACGTTTTTCCATATTGGGGTATGCAGC
TCGAACCTAAAGTGGTATGTACACATCCCCTCAAGCACACCCATTACCCT
TATAGGATTAATGTAAGCAACAGCTTACACGGAATTGGAAATACTATTCA
ACGATCCATGCATCTGCCAGATTCGGACATGCATATTCCCCAATTGGATA
TAGAAAATTAACGTAAGGCAGTATCTTTTCACAATGTACTTGCAACGCGG
CGACTTAAAGTTGAAGTACAACCTGCAGCAGCGGCTTTTTGTACGGTACG
CCAAACTGTCAATGGATAATATTGCGTAGACCGAAAAAGGTAATCCTCAA
CACTACCCGTGGTGGATGACCTAAAGCAGTAATATTGGTTGGAATTATCT
CCCAGACGGCACCGTCTCCCCGAGAAAGCTTAGCCCCGAGGTCTACCTTC
CATACACCACTGATTGCTCCACGTCATGCGGCCTTCTTTCGAGGACAAAA
AGGCATATATCGCTAAAATTAGCCATCAGAACCGTTATTGTTATTATATT
TTCATTACGAAAGAGGAGAGGGCCCAGCGCGCCAGAGCACACACGGTCAT
TGATTACTTTATTTGGCTAAAGATCCATCCCTTCTCGATGTCATCTCTTT
CCATTCTTGTGTATTTTTGATTGAAAATGATTTTTTGTCCACTAATTTCT
AAAAATAAGACAAAAAGCCTTTAAGCAGTTTTTCATCCATTTTACTACGG
TAAAATGAATTAGTACGGTATGGCTCCCAGTCGCATTATTTTTAGATTGG
CCGTAGGGGCTGGGGTAGAACTAGAGTAAGGAACATTGCTCTGCCC
>193
AGATGTGCATGAGAACTCTTAACAATACATATTTTTACTGAAACACTTTG
GTTAGCATCTTGTGATTACTTTATTTATATAACCTAGTCGCCCCTCCCCT
GTCTGTACTGTTCTTGCAGGTAAATTCAGGAAATAATACATCCTCCACGA
CTACAACATGTGCAAGTACTATCCATAATAGGTGTAATCATAGAGAAGCA
GTCCTAAGGAAATAAAATCAAAGAAATTAGGTAAAGGTTGGGTATTGATA
GATGAAAATGTTTTTGCAAGTTAAAAAGGAAAATATGCACATTCTCTTAT
AACCAAATTCGTCTGACATCGATATATCTTTTCATATAAAGTTCTTCCCC
TTTACCATTCACTCCATGATGTCGTACCTGTTACACTACAGTGCCTGCTT
GATTGCGCATTCATAATGGCTGTACACCGTTTACCCAATGCATTCTCGTC
TGCAAAGAGAAGGATATACATCTTTTTCTGGTAATAACATGTACCGATTA
GGAAATTAAGACCCTGCTTTCACGCGTGCTCCTACCATTTCCGGTAATAA
AAGTTCGGGTAAGATTTCTTTTCCAAACGAGCTTACGTGTCGCATCGACA
AATATGGCGAGTGCTCTTATATAAGTAGGCAACATCTAAAAAGAATGGAC
ATCTTTTTTTT
>194
TTCTTATCCAATTACTTAATTCTCGATGGTGAGTCAAACTGGTTGGAGGG
TGTCATGTCTCTAGCTATGTATATTTTGATTGCAATGGCATTTTTCTATT
ATCCAGACGAAAAAACCCTTGACTCTATTGGAAATAGTTTATGAGTAAGA
ACAGTAGCGCAGAAATTCACCATTCTCTTTTTTTTTATATTTTATCTTCT
TCGTAATTCTATCGATGGACCAATACAAAGATGATTATGACTAGCAAGTC
ATTATTATGATCGTTATATTATACATATTATGTTTACGCAACTAATTTTT
ATATCGAATTTTATCTGAAAAAAAGTTTTCAAAACCAACAAAATATTTTG
TACACTCTTCGAAACTCAAATTCTGCACCATTTCCATTCTGATAAAAGGT
TTAATATTTCGAAGCTTCTCAACTACAGCTCGTGTTCTTCTTGCAGCACA
TCAGCTGCTTTGCTGCACTGTTCAGGGTAACGTTATTCATTACAACGAGA
ATATTTAGGAATTTTGCTCAAATTCATGGAGCTTCCTACATCATTGCACA
ACAGAATTTCGTTTTGTAGTATAGTTTATTAGAAACAAATGTGAATAGAT
CATGAGACGCGAAGCCCTATTTTAGCGGATTTTAGCCTTACATTTCTGAG
TGAGAATGCCAGCTGAAACACATTCTTGTTACATCTGTCACGGCATTCCA
GCTGTAAAAAACCAGCAGATATCGCATAAAAAAATGGCCAGCTATAGAAT
AAAATTAGCCCAGCTATATTTTTATAGCGTCTTTTGATGACGCGAAAAGT
AGACTTCGCGTAACACGAAAAATGCTGGTGCAGGTGGATTTTTTTGGCAG
ATACTACGGTCAATTCTCCGCTCGAAGATTTTTATAGGCCTGGCTAGTTA
CCTATTTAGTGCAAATTGGGAAGAGATCTATTGTTCCCGCAGACACGCTA
AGTGGTAGCTGTAACTTCGGAGACGTGTGAGACCTTCCTCAAACATGTTA
CAGGTTGATCGATTTACACATCTAATGCAAGTTTAAGTGCTTCTTAAGTG
TTTTTTTCTTTAGTCTTATAAGTTCTCCTTTCTTTCACTTTATAATTCTC
CTTTATAAAAGTAAGACC
>195
GGAGAAATTCTCTGGGGATATAGTCCCCAGATTTTTTGAGTGGGCCCCCA
ATGTCCCACATCGTTATTGAGTTGTTTCTTTCTCCAGAAGGTCGTTGTAC
AGTCATTATAATGGCGGTCAGTATAATGACCTCCGGAAATACCAACATCG
GGGAAAGCGGAAAATCTGGAAAAATTCTCCACGAAGCTTTCTCTGTGATA
ATCCGCGACCGAGAGTTTAACCGAATCCGCGGAACGAGATATTCCGTGTT
TATTGCGGTATTATATGAGCCGGACGAATCCGGAAAAACTACGTGACAGG
AACGATGACCGGGCAGCAGGCGAAGCTGGAAGAATATAGCTAAGAAAATG
CGCACGGAAAAAAAACACTCCCGAATTTCTCCGTGAAAAGAGCCTACTAG
GGGATAATAGTAGGTATCCGTTAATATTACCGAACTATTGAAAACCTACC
AAATGCAAGAAGATGCAAACGAGCTAGAATGTTCCGCGAATAGCTCATCT
TACAATTTTTTTCTTTTTTCAAGAAAAAGAAAGTATTTTTTTTTCCTTTC
ATTTCATTGCTCCTCCTCCAGGTGTTATCTCGAGAAGATGAAGGCTGTCT
GCGATGACGAATAGGAAAGAAAAAATTTTCCTTAATTTTGCTTGCTTAAT
TCTTATACGAATAATTCTTCTTAATCAACATCGGGCTTCATATTTACCAA
CACGCATTATTGATTAACAATACTTGCCTTAGGTTGAAATTGGACGCCGG
AAGAGAATTTATAGCTAGTCAGTGTTCTTCGGCGTAATTTTATTAATGGA
CATACAGTGTACTTTTCAAACTACACCGCCATTTGATATACCGGTGTAAT
TTTTGATGAAGTGTCAGAATTAGCCGCACAGTTAATTGAACACTTCGCTG
TAAGGTGTGGATACAGATTAGATAAGAGCATTAGGCACCACATTTCTTCA
GGCTTTTCCTGATGCTGGTTTGGATATTGCCTTCATCCCGCACCAAAGCT
GGCGTCCCGCATGAGGAAAATGAAGAGTTGTAAGCAGCACTAAATTCCGA
AATTAAAGGGCGGGCGGATGCCACCAGTAAAATATTCTTGATCAATCTTT
GATATTTTCAAATGATCTCCCATTGTAATCTGAGAACTGCTCTTGTTTGG
CTACGTAAGGCAGTATGAGGGTTGTAGTTAGTAGTAACCCTGTCTAAGAT
TCCCGGTGCTATGTACTTCTCTCACAATAATACAAGTAGTGAATGTCACT
TAATAAATTTTTGTAATAAAAAGTCTACAAAGTTTGTTTGTGACTTGTCG
AAATTCAATTCTGTTGCTTTCATTTTTCTGTAGAGAAGAAATAATATTCC
GACAAAATGTAAATAAATATGCTAAAGTGGGTTACGACAAATTTCTTGAG
AGCCATTGATTTTTGCTATAGAGGCATGAAAGCATACTGCACACACATCC
AATACTTAACTTTGGCAAATGAGGAGCCTAATTACAGAGATAACTTCAAA
CTACATAAAGAACCAAGATACTAGTTAATGGAACGCCTAGACGATCATGC
TTAACTGAACGAAAAGTAACTAATGAAATACAAGTCTCTTTTCGCCGAAA
TTTGAATTTAACAAGTCTAGTATACCCATTGTTAGTGCATTTCTCCGTGT
TTTGAGACGCTTTTTTTACATGCTTCTAAATAAAGGCATCATCCATGCTC
GGCAGCCGTAGAAAATCATTAGCCCCTAACTTCCAAAAATAGACTGCGCG
CTACGTGAGACGCTTACTTCAGCTGTAGTATCCTAACGTGAAGGTTTTTT
TAATTTACCCCATAAGGATCGCGTC
>196
TATGAGCGTTTACTCAACCGAGACTCTTGTTTGCTATTATCTCGATTCGA
CGAACAAACAGTTCCCTGGGTATTCGAACAAAGCACAGTTGGTGATTTTG
TTTGAAACTACAGACGTGCTCTCTTTTACAAAATAAATTGTAGGAAGTGA
TCCGCACAGGCAGAGGGAATTACAGATCACGCTCCTCTCTTATGACTAAT
GCACTCAGCATTTTCTCTTCCTTATAAACTCCGTCCACAGTACCCGATCA
GCTGGCTCATCGTTATTCTAAATTAACTGATGACTGATGTTACGTCTGCG
TCAAATTCCGCCGGAATATTGCGTAGTTTTAGTAAGAAAAAAACAAATTC
CGACGGGAACTCTCTGCAAGGAAGTTTAAGCGTGGGTTACTTTGCTAGGT
TGAGAAAAAGAATTCTTTAGAGGATCACACGTAGTAAAAGAAAAAAAAGA
TCTCTTCGCGCCACTCCCGGTTTCTCTGTGGATACGGCGTTACTAGCGTT
GCAAGTGGCAAAAAAATGAGTAATGTCACAATGGCCTGGCCTTGTCCCAC
TATCCCTTATTCATGGTTGAAAAATATGACCAAAATTGCTGGGGAATTTT
CTCTTCGGTAGTGGACGACGACGACATTAGAGCAATAGGCAATAATTTAA
TTTGCGCTTTAGGTTCTTGCTGACGATGATGCGTGAGTAATATTATTACC
AAGTTTTAAGGGCCTCATCGCTGGCCATTTTTTACACCTGCTTAAATACC
CGATGATGATATATATAAATGATATTGGCTGCTTATCGATAAAGTGTATT
TGATATGTTCCCGTTTAGTTTATTCTTGTTTCTTATCTACATAACAAACA
AAGGAAGGACCCTGTATTGTTTTCCTAAAGATGACTGCTGCTAAACCAAA
TCCATATGCTGCCAAACCGGGCGACTATCTTTCTAATGTAAATAATTT
>197
CCAGATTTTTTGAGTGGGCCCCCAATGTCCCACATCGTTATTGAGTTGTT
TCTTTCTCCAGAAGGTCGTTGTACAGTCATTATAATGGCGGTCAGTATAA
TGACCTCCGGAAATACCAACATCGGGGAAAGCGGAAAATCTGGAAAAATT
CTCCACGAAGCTTTCTCTGTGATAATCCGCGACCGAGAGTTTAACCGAAT
CCGCGGAACGAGATATTCCGTGTTTATTGCGGTATTATATGAGCCGGACG
AATCCGGAAAAACTACGTGACAGGAACGATGACCGGGCAGCAGGCGAAGC
TGGAAGAATATAGCTAAGAAAATGCGCACGGAAAAAAAACACTCCCGAAT
TTCTCCGTGAAAAGAGCCTACTAGGGGATAATAGTAGGTATCCGTTAATA
TTACCGAACTATTGAAAACCTACCAAATGCAAGAAGATGCAAACGAGCTA
GAATGTTCCGCGAATAGCTCATCTTACAATTTTTTTCTTTTTTCAAGAAA
AAGAAAGTATTTTTTTTTCCTTTCATTTCATTGCTCCTCCTCCAGGTGTT
ATCTCGAGAAGATGAAGGCTGTCTGCGATGACGAATAGGAAAGAAAAAAT
TTTCCTTAATTTTGCTTGCTTAATTCTTATACGAATAATTCTTCTTAATC
AACATCGGGCTTCATATTTACCAACACGCATTATTGATTAACAATACTTG
CCTTAGGTTGAAATTGGACGCCGGAAGAGAATTTATAGCTAGTCAGTGTT
CTTCGGCGTAATTTTATTAATGGACATACAGTGTACTTTTCAAACTACAC
CGCCATTTGATATACCGGTGTAATTTTTGATGAAGTGTCAGAATTAGCCG
CACAGTTAATTGAACACTTCGCTGTAAGGTGTGGATACAGATTAGATAAG
AGCATTAGGCACCACATTTCTTCAGGCTTTTCCTGATGCTGGTTTGGATA
TTGCCTTCATCCCGCACCAAAGCTGGCGTCCCGCATGAGGAAAATGAAGA
GTTGTAAGCAGCACTAAATTCCGAAATTAAAGGGCGGGCGGATGCCACCA
GTAAAATATTCTTGATCAATCTTTGATATTTTCAAATGATCTCCCATTGT
AATCTGAGAACTGCTCTTGTTTGGCTACGTAAGGCAGTATGAGGGTTGTA
GTTAGTAGTAACCCTGTCTAAGATTCCCGGTGCTATGTACTTCTCTCACA
ATAATACAAGTAGTGAATGTCACTTAATAAATTTTTGTAATAAAAAGTCT
ACAAAGTTTGTTTGTGACTTGTCGAAATTCAATTCTGTTGCTTTCATTTT
TCTGTAGAGAAGAAATAATATTCCGACAAAATGTAAATAAATATGCTAAA
GTGGGTTACGACAAATTTCTTGAGAGCCATTGATTTTTGCTATAGAGGCA
TGAAAGCATACTGCACACACATCCAATACTTAACTTTGGCAAATGAGGAG
CCTAATTACAGAGATAACTTCAAACTACATAAAGAACCAAGATACTAGTT
AATGGAACGCCTAGACGATCATGCTTAACTGAACGAAAAGTAACTAATGA
AATACAAGTCTCTTTTCGCCGAAATTTGAATTTAACAAGTCTAGTATACC
CATTGTTAGTGCATTTCTCCGTGTTTTGAGACGCTTTTTTTACATGCTTC
TAAATAAAGGCATCATCCATGCTCGGCAGCCGTAGAAAATCATTAGCCCC
TAACTTCCAAAAATAGACTGCGCGCTACGTGAGACGCTTACTTCAGCTGT
AGTATCCTAACGTGAAGGTTTTTTTAATTTACCCCATAAGGATCGCGTC
>198
AATTTTCATCCAAATTGACAGATTCGAACATTATTGCCAGAAAACAGATC
TTATACCAAAATGATGAGAGAAGGAAGAAACAGGGAGATAAGGACTAAAA
AGGAAAATTTATCTAGCAACGTTCACAGCAATTCCTGTAGCTACGTGATG
ACCTCTGCTGGGCTTTTCTTATTCGCCTAGACTGAAGTGATGCAGAACAA
TAAGCATTCTAATCGGCCTATGGTTATGATTTTGAAATTCCTGAGGAAAT
TTTTCCACTGTCATTTCTTCCAATTGAGTCACGTCGCGTCCTCGTAGGCA
ATGATGTGCAACTTGAAGCGCGGAATTCACGGCTAAGAAGGTGTCGTTTT
ATTCATACCGTGCTGTAACGCTGTTTGGTCATCGTTTCCTTGTGTTATCA
AATAAGTGAGGCCCTGTCTCTGTGATCTATACCAGCAGTCGCCTAATTTC
GTAATACGTTATTGTAGACAACAATTTCTTGAAAAAGAGAGAATGTGTCT
GGCTTGCAGGAAAAGAAGATGGTGACATATGCTTAGACGAGATTGTACAT
TCTGCATAATATAGCGAGTCAGAGCACATGTTTAGACAATATCTGATTTA
AATTTCAAAATTAGGGATGTATATTCTAAATGTTTATGCGCTTAATACTA
TCGATGATTTCTGAATGGTTGCCTGTTTCAATGAATCCTTTAGAATAAAG
AACATTTTTGAGCATTGTGTAATTTATTTAGCA
>199
GAGGGACAATTATTTTCCTTCTTGTTTTTTGCCAAGAGAACAATATTGTA
GTATTTAAGTTCTAATTTAATGTTATATATACTTATCTAATAGTTTTTTT
TTTTCAATTAGATTGTTTTCCTTACGACGTTAATCCCTTGTCATCCTCAC
TTACGAACTTCGATGAATATGACATACGTAATCGGGAATGTTTTGTAAAC
TAATTGACGTAGTTCCTTTTTCGTAAACTGGACTGGACGGCTTGATCAAA
ATTCCCGAAAAATAAAAATTTCCCTCACGAGAATATGGAAATTACTATCG
CCCAGCATTATTTTATCTCCTCAGAGAGTAAAAGAAGTTTCCTCTTTCCT
AAACTTAAAAAGCAGTCCTAAATATATAGTTGACTTCGACGCATATCATT
CATCGGCTGCTGATAGCAAATAAAACAACATAGATACAATGGATGCAACT
ACCCCACTATTAACTGTTGCGAACAGTCATCCCGCCCGCAATCCAAAGCA
CACTGCATGGAGAGCAGCTGTGTATGATTTACAGTATATTTTGAAAGCGT
CACCCCTGAATTTCCTATTGGTA
>200
GTACTTAAAAATGCCGTTAATAAAATTTAGCGGATGATAAAGAAATGAAT
GGTTCTCCTTATGGCTGTTTATATATCTGATTTAAAGGGTAACGGAAACC
GGAAGCAATAATGGAACCGTGAAGCCATCCCTTGAAAAAATTTTCCATTT
CTTTCATGAAGACTATGTACATGCCCCTTATGCCAAGCTTTTTGATTTTC
AGGCTAGGAATGAGTAACGTTAATTCTCTGTATACATTCGCCCAGATTTC
TTTACGGGATTTATGGATCCGTCAGAACAAAAAGCCGCCTCCCATGGATA
TCCTGCGTATTAGTCAGCATTATTTCTTTTATTCCGTAGCAGCTAAAAAA
TCTCCTAGAAAGAACGATCCTATCTGTCGCA
>201
GAGCAGTAGCAATAATATATACCAGACACGAAACAATCCATCAACAGGTC
TCGTTTTACTGGAGTTTTACATTTTCAGTTTCTTTTTCGGATGCGAATGA
TCACTAGCTTGCAAACACGAATTGATCACGTTTCACAATTGTTCCACCAA
ACATGGCGATAACGGCAGCGTTTCCTCGAGAAATAGGCAACATCTAGATC
TCGAAATGGTTGGTCTGCACCTGTTTCTGGGTGACCAATCCTCGGAGCCA
TTCCAGTGCTTAAGTCTTCAGGGGCCAGAACGCGTCTTTGCCGGGTGCCG
CATTCTTTTGGCCCGGTCGCGCCTGCCCAAAGTAGCAATACACAACACCC
AAAGAAGGAATTTCTTTTTCTGGAATATTAATGGAGCGGAGCCGCGCGCT
TGCTGAACGCCAAAATTATAAAAACAAACTTTGCAGGTTTTTGAATCTGA
CGCAGTCAATCATGTTTCTTTTCTCGTGTAGGTTAATATAGATAAGCGCC
CAGCGGTATGCTTTTTGCGTTTTTTGCTATTTTGAGACAATGGCGATAGT
TTAAGTTTCTTAGTATGCAGAGGTGCTTTTGTACGACTGGGGCGTTCCTC
AGCGCAAGAGTAAGA
>202
GAAATTTAAATTTGACATAAGCAAAGTTTAAAGTTTTTTTTTTCCAGTTC
TTTTTTCCCATCGTTTTTTTTTCTAGAAGCCGGGTTTTTCACCGTCAAAA
AATTTCCTAAAAAAGATCTGTCAATCATTAAGTTTTGCTTTTTCGGCTTT
TAAGCCATGCTTTCAGGCAAAAATTAAGATTTCTTCGTAAAGATCGGAGC
CTTACGCCCAAGAAGCAACTGGCCGTAAAATTTTTTCTTCGATCGGGTGG
CAAATGGAACAGAAGATCATGAGTAGAAGGAAAAGTAAACAAAGAATTGC
GTCGGTCAACCGGTTGTTGCTGCGTGCTTCAGCGGGTGATAAATAAAAGA
TTTCCTATCTGAGTAATCGATGACACAAGCGGTCTGCGCTCGGTCGCTTC
CAAGCCTTAACAAAGTTTTTACTTTATGGTTTTTAATAAATAAATAAAA
>203
CAAAACGTAAACAAATATAAGTTTGAGAGACAAAGAAAAGAATGAAAGAG
TCTTATATATATATAAGTTAGCTGGTAGCATAACCATTTTTCTCGACTTA
TTTATAAAACATTCGACATACTTCCATATTTCAAGCATTAATATGAGACC
TAGAATTTTTTCAAGCTAACTTATGTACATTGTAGTTATATGATGAGGAA
AAATGTACACAACAGCTTGTGCTGTTTATTCCCATCGTATGTTGCGGTAA
TGCAAACAGCAATAGAAAAAAAATTGATATAAGAAGAATATGACTAGTAG
CATCACAGTGAAACAGTAACGGTAAATGAATCAGCATGTGAATTTTTCTA
GAAAATAAAAAAGAAACTCCGAAGCGGGGAGTCGAACCCCGGTCTCCACG
GTGAGAACGTGATGTGATAGCCGTTACACTACATCGGATTGTACCTTGGT
GATAGTTTGACCTAAAAGAAACGTTCATTATGTAATGAAGAAAGCCAATT
ATTCGGTCGCAAATCAAGGTTCTGTTAGGGAATAT
>204
AAGAAAGAGCAACTGAGAGTATCCGTCTGCGTAGTATAGGACTGAGATAG
CAATTTCCTATCTTCCTATGATGTGGAGACGATTAGTTTGGTGTGTTATC
AAGTAAGATATAAGAATTGATTAATTTGGTAAGAAATGAAACAATAGGAC
GAAAAATACAATAAGATAAGGAAGACCATCAGAACTTATGAATGACTAAG
AAAAGCAGTTTATATTTTTTTTTTGGGCAATTTATTGCTTCTTTTTTTTA
CGTTTTGCGGGCATCACGTTCGTCGTGACATATGACTTGAAAAATGTGCA
AAAGCTTATCGGAGCCAATCGGATTGACGCATTAAAACCGAAGTGTATTA
GGACCAAATTTGCGCTGTATAGGGTTGAACGGTAGGGCTACCAGGGTCTG
AGTCATCAAAGAAAAAGAAATTACAATAAGAGTCTTACTTAAGATGATAT
AGAATTGTTGTTATTGTTCATGTATGGATGCCAAGAAAACAAAGTTTTTT
AAA
>205
GTATCACTTTAATAGTTATTTTAATATTTGATAACAACCTTTCTAATAGT
ATTGTTATGGAAGGTTTAGTGCTGGAGGAAAAAAAAGAAAGATAAAGGCA
CGGTGCCTGCTTTGCGCGGCATTCTCGAGAAAAATAGTTCTCGGACTTTT
GACGTGCCAGTGCAATTATCCGTACACAATTTTATATCAATCTACAGGCA
AAATTATTACGTAAACAGACAAACTACCATGTTAAAACGTCTTGTTCTTC
TAACCTGTAATTTTGATTTTTACCATAC
>206
TACATTAAACGGCTAAAAGAAAGGCCTATAGTCGTAATAACATTTATTTC
CTACACATAACCCAGTTAATTAGCCACAGTGATATTCGATTTATGCCGCT
TCAATTGTGCTTAAATCGTTGCATCGCTTCAGTAACTTTTAATTGTAATG
ATAATGCACGTCAATTTAGTTTCCCATTCGGGTAAACAGTATCAGGTCGA
GATATGAAAATTGGCATTCCTTGGAGAATGTTAGCCAGAAGATCGATCAG
TCGACTCCCCTATTGATTAACATTTCATCTTTGCATACTTGGCGTTTCTA
ATC
>207
TAGCGCCTCACCCGTCTTAGCAGCCATATTCACACCAACACTAGTGGGAT
CGCCTAACGAGACGGAATATGCCCAATTATCGGAATAGGCGTGTTCTGCA
GTCAAGGAAGCTGTAGTTTTGTTATTTCTCTGATTATATCGCAGGATTCT
AGACAACGACATCACTCCGTATGATAAGTAAAAGGATTACGTACGCTATT
GTGAACGTTTTTGCAATCTATCTAGTTTTTCCTATTAACTTTTTTCTTTT
CAAAAATTCATAAAGGCAAGGAAATATGTTCCGATTGACAATAAGTTCAG
TGAGTGAATGAATGTTAATGAAAAGAATTCAATTTCCAGATTTTCGTATT
TATTTTTTTTTTTTGCACCTTTCCTTATTGTGTGACCACAGCCGAAGGTG
ACGAAGGGATGGAGACTAGCCAAAGAGAGCCGGCTGTTAGACAAAAAAAA
AAGCGGAGATTGTTTAACGGATACGTCTTAATAAGCAATCCGGCAGCACC
GAGAATGTTTTTACCCTCTGTCCTTTTTCTTGGCGTTCCTATAATTCAAA
TAACCCCCAATATGCTAACAGCCGTAACCTTAAATGTTAGACATGTTACC
CCTGTACGTCATTGCGGGGGGAGTGCATTGATTAAGGGGTAGTAGTAAAA
ATTCCCACCGGACTTGAAGTGCGGAAAAGTAGCTCCGATTTGGGGAAAAA
AAAGTACCAGCCGTCTCGTCTTTCATGATAAAGTGAAATAGAGCAGCGGT
AATAATGCGGCGCTATTGCTTCCGGAAGAGTTTACGTATTGGGCATCTTT
GCCATTTCTTTTTTTGGCAGT
>208
GGCAATAATTCGGGAATACTGCTCTAAGACCTTGTTTTTTCTTCTGTCAG
GTGAAAGTATATGACCAAAATCTACATCCCTGCCCTAACAAACGTCATAG
AAGTAGGAAATAAATGATGAGCCCCGCAAAATGACGCCGCACGGCGATGT
TTAAGACCCTGTACTCACAATGTAACCACTTCGTGCAGAAGCTTCTGGGA
GGAAAGGGTCCGTACATGAATTATCACACCCACACCCCTCATTCAATCCT
TCTACCGCGCATGGTAATCAATCATAACAGGAAGCGATAAGAAAGTTTAC
ATTGCACAGCCACCCTCATTGCCTCTGTGATTGAAGATCTGGGAGTGGGG
CTAAAGGTGCAACTTCCGTACAAGAGTGACGAGATAAAGGATTTTCCACG
GAATGGCTGACAAAATTCGGGGCTTGTGTGAGTTCCACGTGCGGATGACT
TAATAAGCTCAGTGATTGTACTTTTGACATGATTGATGAACGGCTAGAGA
TAGCCACCGAGTGGCTACTTAGTAATAACCAGCGTAGGAAACAATTACGG
ATTTTGTTATCGTTCACCGATAACCCTAAAATATTGACCACACTGGTAGT
CATTAGAATTTAACCAAGAGGGTAGCTTAGTTCGACCGATAATCAATATT
ACTGAAGTCTTATCAAATTCTGACTCTTGCCATACCGTTTCTTATCGTCA
CTGTTTAATCCGGAAATTAGTCATGTATCCACACATCCTTTATTAACAGC
AGAGAGATTGGGCAAGAATGTTAGCAAACTATGTACCAGGCGGGTAATAC
CTGTACATCTATTTTCTTTTGAAAAGGAAAAAATGCAAGAAAGGGCATGA
AATGAAACTATTTGGTACAAATTAGAATTATGCGAACCGTGCAAAATCAG
AAAAGGGGGAAAAACATTGGCCAATGCTTAGAAATACCATTGCATTAAGA
TCATTTATCAGAACACAGTCGACGCGCCCATATCCTGTAAATGTAGAGGC
AGTCTACTATGCTCCTTTAAAGTTACCTATCAAATATGGTGATTTAGTT
>295
AGGAGTGGCGGAGCTAGCGAGCTGCGATAGCAACGTTTGTTCGTGGACTA
GGCTCTGAATTGTTTGTAGGTTGGGAAACTGGTACTCGAAGCAGTTCAGA
ACGTTCTGCGCCGCCGCCTCTTCCCCGTTCCCTGCGTCCCGAGCACTGAT
AATGAAGTTTGGATGTGTGAACTGCGCAGCAATGGAGGATTTATAGTTAA
CCTTTCTAATATTGAGTCCGGCGCTGAAACTGGCCGGCGGCGAGTCCCTA
TCCAGTACGCTGACGAGGTAGAGACGCTGATAGTCGTCCAGGGGGTTGTC
CGTTAAGTGTACCGTGTCACTGTTAATGCTAAAAGCGGGATATTTCATGT
TGGAGAAGGTGTCTATGATAAGGTATTTTGAGCTTGCCGTTGTGTGGGGA
GAAGAACTGGATGCGTACCGAGAACGAGCAAGTTAAAACACTAGTACACG
AATAATAGATATATATATGTATGTATATATATGTTGAAGTGTGTACACAC
GTACACGCACAAGCTACAGACGCCACGCGGCCCGGCATTCATATATGTAC
ATACATTTATGCACATATATATATATATATATATGTATATGTAAATGTAT
ATATACAGCTTGTGATTTCGCGCGCCGAATGGGCTGAAAAGCACAGTATA
GTGGAGAAGAAGAGAGAGGAGAAGGGGAGAGGGGCAATAGCAATGGATGT
GGTAGAATACAGGGAAGGCCAAGCTGTTGTTCAATGGATGCGGTTCGAGG
CCCAGCGCAAGGGGGGCGCTTCGAAGCATAGAACATTATCCGCGGAAACG
GGTATTAGGGGTGAGGGTGAATAAGGAAAGTCAGGGAAATCGGGCCAGAG
TAACACCCATTCATAGCACTCGTACAAGGTGCTTTTAACTTGCCTGCATG
TGTGGAGTCACAAATTAGGGGACTCAGGCACAGAAGCAAGGGTCCTTTTT
TGGTTCCCTGTTTCCTCCTGCGCATTTCGTATTTTTTCTCATCTCTTGGC
TCTGGATCCGTTATCTGTTCTGTTACACAAGAAATCGTACATTTACAATA
TAGTGATAATCGTGGACTAGAGCAAGATTTCAAATAAGTAACAGCAGCAA
AATGGCAAGACAAAAGATGTTTTATAACAAATTACTCGGCATGCTCAGCG
TAGGATTCGGGTTTGCTTGGGCGCTCGAGAACATTACTATATACGAATTT
GACTTTGGCAAGGGCATTCTCGATCAAAGCTACGGCGGTGTATTTTCAAA
CAACGGCCCTTCGCAAGTGCAGCTGCGGGATGCAGTCTTGATGAATGGGA
CAGTGGTATACGATTCAAACGGCGCTTGGGACAGTAGTGCGCTGGAGGAA
TGGCTCCAGGGACAGAAAAAAGTTTCCATCGAAAAAATATTTGAAAATAT
TGGGCCCAGCGCCGTGTATCCGTCTATTTCGCCTGGGGTCGTGATTGCGT
CACCATCGCAAACGCATCCAGACTACTTCTACCAATGGATAAGGGACAGC
GCGTTGACGATAAACAGTATTGTCTCT
>296
ACAAGACTATAAAAAAAAATACTCTTTAGGATGCAGACATAAAAGAACAA
TACGACCGTCCCTTATTTATATATAGTCCATAGAAATAATCTCAACCAAT
ATAATATGCAAGAAAATAACGAAGTAAGGAACAAGCACAATGGTACGCCC
GGTCTTGAAAAAGTTTAAAACAGTACTCGACCCTAGGCGCTAGGGTGGGT
GACGCATTTTAACTTTGCAACAGAATGCCATATGCGGTGTTAACCTCACA
AGATCGGCTCTACTATCTGCAAGCTGCGGCAAATACCAGAGAAAATTCCA
TTCCCGTCGACAAAATTTAACCGACCCCCCCCCCCCCCAATTTACGTTTA
TCAGCTAATCCAAATGTGGAAGGGCAACATTCTCGACGACTCCTTTTTCC
GTAATTTAAGTTTGCCCAGGCAAAATCTTATACTTGTTTTCGTAAGAGAA
AGATGCGCAGATCCTTTAAGGTTACCTTCAAGCAAATCCAGAAGCACAAA
TGGCAGGGGAGAAAAGACATGAAGCAGGAGTAGTCAACCGCAAAAACCCC
CGCGGGCTTGTTGTTCTGCACATTTTTGATGTGTTTGTTCCTAAGACAAA
GTCCTAACTTAGGGTAGTAAGTGACTATATTCTGCACGCTCTTAAAGCAG
CCACCTCGTTTAATTTTGCATGCTTATATAAGCTTATAAACGAAGTACCT
GAGGACCTGCATCGGCCGGCCCATGTGAAAAGGAAGTATTTACTTTTTCT
TCTTCTTTACTATGGAAATAGCTGGAATCCGACTATGCATATGCGTAAGA
AAAGAAAATGAAGGAGTTTTCACAGGAAAGCACACTTGCATACTGGGCAC
AAGTGAGGAGAGGGGCCTGTAATGCTTCTGTGTTTAAAAGACTCCGAAAT
TAGTCAACGCAGATTTGCAGATGCACGCAAGAATACATAATCAATCACAG
TAAGCACATCTCCCCAAGGAAAGAGTAAATGCCTTCGAGCCAGCATTGTG
GTCATGCGAGATGTCTAAGAAAAATACTTCGATAAGCACGAGGAAATGTA
ATATGTCTATCTACCTTATTTTTTTTACAATAAACATATAATAAATCCCT
TATCTGGTCACGTGAATTAAACTTCGGGTGTGTTGTAAGAATGGAAGGAG
TAAGCGAAACTCAAATTGAGGCCACTTACCACTTCCGGTCGAGCCCGGCC
CAGAACCAGTCGTCGGCCAACTTTTTTCTTGGAACAGCGTTACCGCACCT
ACGCGAGAAATAGTAGATTATAGATAAGAAATACAAGGAGAGGGGTGTGG
ATGAGCTTTTTTACAAAATAGTGTAAGGCGTCCGGGAAACCCCAAGAACG
TTTTTTGACATCCACTAACAGGATTACCCGTCATAGATATACTGGTGCCA
TTACCCGTTAATGGCATCTTGTATATTTCTTTTATCTTTCTTAACATTCC
TGAAAATTGGTAAACAGTAAAAAGAAAAGAAAAAGAAAGAAAAAACATGT
ATTATTTTGAATTTACTGGAAAATAGGCAACCATTGATTTTCGTTTTTTT
ATCGTTCTCATCTCTAGCTCTGGTCAGCATTTTTTACTTTATAACAACAA
GTTTTTCATTAAAATCCATAGTAGCACAAGGTAAAG
>297
TACCATTATCCAAGTGAACTTGTTAGACGACCAAATATAGCCAAGATTCA
TTACGATTATCTTTAACTAGCAAGTAGTATTCTTGGATAGAGAGATTTTC
AAAGACGGAACAATTTTAAATAGATTTACATAAGAAAACACATACTGTCC
GATACCCATAAGAAATTTAAGAACTCTTTTCATCTTCAGCTTTCCGGCCT
CCTTTTACTGTAGCCTGTTCCTAGACAGCTAAAAATAGTACATATGCAGC
TCTGCAATAGTCTCAAAGGGGATATTGTGTAGGTTTACGAAATCATCACA
TTTCCGAATCAGGACATGAAGGCACAACTTTCCGCACGTAGTGTTTTCAG
CCCCCAGCGCCTGTCGGCGCGAAGAGGATCTGCGGAGATGAGCTTTGCCC
CGCCATTACCCGTAAAATATTACTGTTTTGGGCAATTGTGGATCAAAAAG
GGAAAATGCGGATGGTGAAAAAAATTTTTGGAAATTTACTGCTTCAGATG
GGGGAACTTTGTAAGTTCTTCCTTTTTTTTCGTAGAGG
>298
CGTTTTGAGTGTCAATTTATTCTATTTTCAACGACCTTTTAAAGTAATAA
TGAGTGCTCTTGACTTAACTCTAATGCTATAACTGTTTCTTTGCACCGAT
GCGTTCCTTTGAATGATCTCAGGTAATATATTAAATATTTTTCAAATGTC
TTTACCACATTCTTCAGTAATACATTTTCTCTCTAATTTTTCATTTTCCA
TTTTCCATTTTATTTTTAGAACGTGTGACAAAGTTGTTTCAAGAACAATA
TAGAATTCTTAGCCAAAAAGAGAAAGCAAGAAAATTAAACTTTATTTGTC
TAAGAAAAGCCCGAACAGCGAAACCGATCACTTCCCAGGATCGGAAGGTG
TCACTTTGCGCCTTTTGCTCCGCCGCTCTTTCGTCGGCGTTCTTTGCTTC
CCTGGGCGCTGTCGCATTAAGAATATCATGTATATTCAGGAACAAAGGTA
AATCACCTATAGACGTGCGCCGCAATAACCCTGCTAAGAAAATTCATTTA
AAAAACTTACCTGCCAGTCTTGTTGTTTACTCAAACCACATACTATGAT
>299
ATGAGCCGTTTGGACTCACTACAGGATCATATACGATTAAAAGATAGAAA
TAGGCATCTCCCGCCTTTGGAGCAAAAAAAAATGGTGGTTGCTCTTGGTC
GCGAAGTGAATCTTCAACATTGCTGAGGGGACGGCTGCCTGACTTCACTG
TGACGCGAACGCGATAATTTTTGCGTTAGCGAGTGGCTAGTAAGTCCCTT
CAAAAGCCACTCCCTGTAAAATACCGCACCTTCCGGGTTGCTTTCATAAT
CAAACAAAGTTTAGGACTCCTCCCAAGACTCGTCCCTTGGCAAAAAAAAT
TAAGCACCTAACTAAAGAAACTTTTGCCATTTTTTTCCTAAAATAATTTG
AAATGCCACCCAATTTGCAAACATGATTCATGGATCTTGGAATTATCATA
TTATTTAACGTTATTTGCACCTATCCACGAGAGAAAGCAAGGAACATAAT
TCCGTGCGCCGATATTCCAAATCTTTCCGAAAAAAATTCTCTAGCGGATT
CATATAACCCGCTAGATAAGCCATATATTACTAATTGCCTTTCGTGTCTA
TTT
>300
ACGATGTTGTATGTTGTTTTATATAGGTGAGAGCAGGATCTGCGGAAAAT
ACTTCGTACCGTAGTATCCATTTTGCCTATGGAGGAAAGCTTGTTTCCAA
ACCAGGAGATCCGCAGACAGGAAAAGTTCGAGGCCAAACAAAAACCGCAG
CACAATGGAGTAAAAGTCGAAGGCACGGGCCCCAAACGATAGAGTGGAAG
TTGTAGGAAACAAAAGTGGCCGTCTATGTGGCGCTTCTCTGCGGTGAATT
CTGTGCGAAGTGCCTAAACGAAAACGGACGGAGAAGGCTGCGGGGGGATA
TCCCTTGCATAAAGGATGCCCGGCACTGTCCTAGACGGTGCCTTCCCTTA
GAGACTAGGAGAGACTTGAGTAGGAGAAACTGAGCAGGAAAATTCGAGAG
ATAAAGTACATGTGCCTAGGTAAGCTGTACTTCGAACAGCTAATATTAGT
AAGATGCATAAAGGGGCGTCAAAGTGGAAATATAACGACAGGAGAATCTC
GGTGTGTAAGTTGGAATGTGTATTGCACCACTTCCATGATTGGGCTTTTT
TCCTGGCGCAAAATGTTGCTTTTTCAACATTTTTCTTATACGCAGAGAGA
GAATCGTCAGATAGGTGGTAAAACTTGGAGCCTAATTAGCTCATTATTTC
ATTTGAACGAGACATTGGCTTCTGCCCTACATCACCCATACGAGACATTG
GCCTTATACGAGGCGTACTTCGCTTGCGGGAAAAAAAATTTCTTTTGTAA
GCGAGGTTACTCAGAAACTGTGACTGAAGGCAGAGGTTGGAAACGTGTGT
AGACTCCAAATGGAACGATAGGAACGTGTACCCTACCGCTTCTGCACACG
TTTCTTAGATATGCGTGCCTTAAGGCGACCCATTGTTCCTGTTTACCATG
ATTTCTGT
>301
GACTAAAGACAAAAAGGACCCACTCGATAGGAAAATAACGGCCGAAACTC
TTTGGGCGACATTTTCTTGTTAAGAAAACAGAAGAAAAAAACCTTAATTT
GAACTTTCCAGGCACACCCAAAAAGGATTATGCTTATGTAATGCCACATT
CCGAGAAACTGAAAGGCAAAAAAGAAAAAGCCTTTTTTTTCCTGCCGCGA
AAGTTTAATTTGCCTACCGGCGTTCCTATTGGAGTCAGGAAAAGATCACT
AGGAATTACAGCTGTGAGAACATACTCTGGGGCTGGCGTAGGCACACAAT
CCGGTATTCCTAAAGTTTTGTGGTACAAAACTCCATACCTAAAACATAAA
ACAAATCTCACCCGTGGATCCTTTTATTCATAATACCCCGTCCTGCACGC
CGTGGAACTGAGTCTAAGTTGACAAGGCTACGAATGAATTTTGGGAAATG
CATACG
>302
GCGAAATATACACTTTTCTAACCTAATTAAAGATAGCTAAAAGAAAAAGG
GGTACCTTCAATTACAAGATACCAGTAGAAACTCATCACTTTTGCGTTAC
CTCATCATTGTCCCCTTCGATGAGATATGCCTCCTCTATATAGATAATTA
AGCACCGCAATTTTGAACCACTTCTCCTGATAAAGTTCCATCAGTCCACC
ATCAACACATTTGCGCCTATTCGATGATCCGCAGTAAGGGACAATAGAAT
CGAAACATGCAGTTCCTTTCTTTCCTGCAATTCTCGGGTCTAATGTGGCT
CGAGGGTATCTCTTATCGGTATTACTTTCTTATCAATGAAAAATTTCTGC
CAGGGAAAATGCGCCCGCTTTTTTTCCGGCCATCCTTACTCGCTGTCGCA
TACAAAATAGCGCCTCTAATCTAGTTGCGATAAGGAATGTGTATGTGTAA
TTGAAGATCCAGGATGTTTTCCTTTTCAGGGAGATGAGAAGGAATAATAG
GATGGATTGACCGCTTTGCTGTCACGTCGATAAGGTTCCTTTAAAAATTG
TGTCCAATGATTAGCATAGAGAGGTAGAGTATCAGAGAAACAAGTTTGTA
ATCGAGAAACTTGATCTGCTAGTGTTGAGCATAGAAGGCTAGGAAAAC
>303
TGAAATTTGACCCCATACTGTGAAAATCAACTGCTAAGAACTCTGTGATC
TTCTAAGATAAAAAGGCGGGCCCCTTTTTTCTTCTATATCTATTTATTAT
CTAAATATGCTTACATAAGCAAAATATACCGGGGTAGTTAGTGCACGCGG
GGAACTACCTCTTTCTTACCGGATCTTGCCGCATCCTTTTTTCTGTTCAT
TCTCAGAAAAAAGAGGCTTTTTTTCGTGAATACAGTCCGAAGAGCACTAG
AATTTCGGACCGAAATTAGTAATATCTTCTGTACGAAAAAGGAAGACCCC
TTTTCGTACAGAAGCCTTGGTCAATCAGAACAGGCAACGTTGTTTTTTCT
ACTCCGGAATTTTCTGAGCGAAGACAATCGGCCCTGAAGAGAGGATCAAT
CGTGGAAATCTACATCGTCCTCAAGAATTTCTAACGAGACTTCATGTCAA
AATTTAACTTTTTTAGCTTTTTTTTAAGGTTGGCCCGCCAAAATCGTAAG
TCTCGGTGCTCTGTTTAGGAAATAAAGAAGAGAAACGTCACCTAAAAAGT
TTAAATTGAAGATGTCGTTCTATCTCGCGAATCTTAAATGAAAGACAGAG
TGGGTTGATGACACTAGCGGACTTG
>304
ACGTAGTTTAGAAGGGCGCGCGCATTTTTTCTATTGTTGCCTCTTTTCTC
GCTAGCTGGCTTTTAGCATCATGTTCTGCGGATATTATTCTCCGCCCGGA
AGGTTCGTGGAAGGCCTAGAATGAGATCTATCAATAACGCTACGCAGATT
TCTAATGTTACATGTCACGTCGATCTGACATATATCTCCGTCAGGTTCGA
TCCAGACTCTCTGCGCGCGTACCAAGAGCTTTTTGTTTCAATAGGAACGG
AATTTCCTTTATTGAATGTGGCAACGAACTGCGGAGGGTTATTAGCTTCT
TGACACTTTCTTCGTCCATTACGTAGACCTAACGTTGAAAAGGAGACCTC
GAAGAAATTTTAACTCTTGGCACCTCAGAATAAACAAGGTCATCTAGTGC
GATGGCAATGCTTCAAAGTAAATGGAGAATTTCGAAGGCTAGCGTCTCTA
GATAAATCTCAGCCTAACCCTTTTACACGAAGTTTTCCCAACAAAAAAAA
AAAAAAAAAAAAAAAAAAAAAGAAGGGCGGTTGTCTTTGGCATATCGCGA
AAATAATAGATCTTATCAAGGGGTTTTTAAGTCATCCTCTGATTATTGGA
AGTCATAATCACGTTCAATGGTGGGAGGCCTTCGGAAAAGAAAAGAAAAG
AAAAGAAAATTTTCTCAATCTGAAACAGTCTCTTGTTTACGTTACACTGG
CAATTTTAACGGCGAGACTCATCTGAAAAAAGCTATTCGACTTAGTCCTG
TGTTTTTCATTACAGATAATCCTGATCAACGGGTGTACGTTTTTCCATTT
TAGGTCAGTATCCTCCCTCTGTGTTTCAAACTAAGTATAAGCGCCCACCC
TAATT
>305
GATTGGGACAGCCGATGCTTATATACGGACGATTGCCAACCGCCGAAAAG
GTTCAAGCCAAGAACAAAAAGTAGAGAGAATACCCCAACAATAGCATTTG
ATGGCTAAACGGCAGTGCCCGTTAATACTATTCAAATTATACCCCGCATT
AATAATTCCTGTCCCTTTAGTCTCGTCCTTCAGCCGTATAGCCGCAAAAC
TTCGTTCAATGATTTCATGCCATCATTACACCGCGAGTCGTGGGTGCATT
GTAGTTTATTACGAAAAGTATCTACAATACTTGCTTAAATAACCTACATT
GTTTTAGGCACTATGGCCGAGTGGTTAAGGCGACAGACTTGAAATCTGTT
GGGCTCTGCCCGCGCTGGTTCAAATCCTGCTGGTGTCGTTATTTTTTTAT
TTTTATTTTTTTTTTATCGCTTACTGATTATCAGATATCTTCGACAGCCT
CACACAGATTGGTGATCACGCACCCATAATCATTTCTTCGGGCATGCTCC
TATTAGCCACGGTTCGCAGAATAATCTGCGCGATGTTATTCACCAAGACC
GTGGAGTCTCCTTTTCGGTGGGATCCGCTTATATCCGTATGCGTCGGTTG
CTTTCTCGGGGAAAGGAAAAGGAGAAAGCCCGGATAACACGACACAAGAG
TCATTCGTTATGCACGGACACAGGGAATCGTGCGGAGCCGGGGATAAGAG
GCCGTGCTAATTTCCGCGGAACATCGGAATGCAGTGGACAAGTGCCCTGA
GAACAAGCGGCGGGCGGGTAGCTGCCACGGAATAGGCGCCACGTTTCCGT
GGGTGACTATGACTTTTGATCGATTCCATGTTGTTTTGCCCTGAATTCTG
CGCCCCTCGGAGAAGTTTCTTTTCTTTTTTATCTCTTTTTCATCTCTGAC
CTTCGTTTCCTTTCATATAGACTACGCAGCAGAATCATGGCAGGAGCTAT
TAGCTGAGTGGGCAGATTACGTTTGCGCACTGTGCATTGTGACAGATTAT
ATTTGCTTCGCTTCTCCCTCTTACTTCTTCAGCATAAGTGTAAGCCATAT
GTTCCCTGAAATCTTTCTACCGTCGTCTTCTCT
>306
ACAAAGTTAATAATGCTTTGAAGTCGAAACAGAAGAATAAGGACGATTAG
TGTTTCACCATCGTCAATAGCTACCTATATTTATATACAAGATTCCGTAT
AGTTTGTACACCACGTCAGGACATCAATAGCTAATAATCGTTCTAATGCT
AATGTTCAACTGCTCTTTAAGTATTGTTTACGTCTCGTCGTACCAGTATG
CCAAATTCCTGTCACTTCACTCATTCTCTTTGCTCTTACCGTTTGAAACG
CGCTGGGACGGAATTCGCTCATTTCGCATCGTGCTTTGTTGTTTTTTTTT
TTTCAAAATTGCCATTGTTTATTTATAAACTACATGAAATTATTCTGTAT
TTATCTTCGCATTCCCTCTCTTACTTCAAAAGTGAGAACAGCATATTCAA
ATATATATATCTACTCAGTTGAATAAGACACTATAGCAAGACCATTTGAA
CTGAAAGAAACAGTTTCTTTGCTCCCCTCTCGAATTCCAACTATTTACAG
TCCTTCCTTTATAAAAATTAACTAGCGAGCAAGAAAACATTTGTTTAGTG
CTACCCAACTACTTACATTCCTTTAAAAACCACAATATTTAAGTTAACCT
GAGCTTTATTTTTAGTAAGTTATTTACCACAATTTTTCTCATACACCTTT
ACAATCCGTATTGCCATGAATACCAAGGCTTGCTCAGCTTCTGCAGCAGT
TCAACCCTTTCCAATACCGCCAATGCGTCCTCAAAACGTTAGTTTAGTCG
TGCTCAACCGCTATTTTTGGTTTTATCTTCGTTTCTTTCTCCTGAACGAC
ATTCGTCACGAAAATTGCGGCGGAAAATTTCCTGATGCGGACACTTTTTC
CCGATCCGGACATGCCTTTTTTTGGCGTTTCGCGTCAGTCAATAGAAGTT
TCAGATCTACATTAGGAAGAACCAGAAAATAGCCATTAATGCTTTCAGCA
TAGCACAGCATAGCAGCTGTGTATATCTTAA
>307
TAGTAATATTATGCAGCCATCACAATTTTGAACAAGTAGCACATTATTCA
TTGAATAAATGCTAAAAAAATCTCCGCGACGGGGAATTGAACCCCGATCT
GGCACGCGACAAGCGCCCATTCTGACCATTAAACTATCACGGAATATTAG
ATGTGATATTGTTGTATCTCAAAATGCGATACGTCAATATGACAATACGT
CATCCTAAACGTCCGTAA
>308
AACTTGGTTCTTTAATTACGATAATTCAGGATATGCGCAAGCCACCTACA
GATTATAGAAGCAGTCGAGTACGAATCACTGTGACCGTCATCCTAGATAA
ATAGTATAGCTTGATGAAGAGTACTGAACCAACAAGTACGAGCTTCTATG
GCCAAGTTGGTAAGGCGCCACACTAGTAATGTGGAGATCATCGGTTCAAA
TCCGATTGGAAGCAATT
>309
AGCGCCTTTAAAGAATCTTGAGATCTTAGTAATCCCGATGGAAGGAAAGA
GGTAAACAAACGAATAACTTAACCCTTAAGATGATTCTATACATAGCATG
ATCTATCCAAGGAACGACCGACGCCCTTAAAAGGGTTCTGCTCAGATTTC
GTTAAATACCCGGACCATCGTAGATGATTGTTTTTACTCTCCCCTAACGA
TGTACTATGCCATAATAAG
>310
AGGATATTGATAATATATGCTGTCATTTTGGATTCAGTCTGCTTAACTGT
CTTGTCCACCCCCGGTGTTCTTACCCGTCTGAGCGGTCGTAAGACGGAGG
TAATAATTTTTCAGCATCCTGACCTCCCCCCCAAATCTGTGCCTTTCACC
ACATTTTTCTCGAGAAAATGTGTCTTGGCTCAGATGATGTCGTATGAGCT
ACTGGACTTTTTTTTGTTGGCCCTGATGAAAATAG
>311
CCATATTAAACCCAAAATTATCAAATTAGTAGTACATAAGATCGAAGTAG
AAAAAATATAGATTATAATCCGATATAGTGTAACGGCTATCACATCACGC
TTTCACCGTGGAGACCGGGGTTCGACTCCCCGTATCGGAGTATGTTTATT
TTATTTTTTTCATATCCGCTCGAATATTGCCTTCGTTTAAGGTTTCTATA
TCTCTGGTAAA
>209
TTGTAACCGTGAGGAGTAGACTCTTTGAATACGGGGGAAGAAGAAATATC
ATATTCAAAGCTAATTCATTGAAATTAGTGCTTGTCTCATCTAGCCTTTA
GTGCTTAATCTCTGGAGGAGCACATATGGGGTTAAAGCCATGCCGGGACT
GGGGGCCCCTATCGGGGCTCGAACCCGAATCCCGCGAGTATTTATTTGAA
GGTCCGGGACGCAAGTTACCTAATCTGGTTAATTGATATCCCATTTAGGC
GATGACGTTCCTTCCCCTCACCCCTCGGCTTGTTAGAAGATCTATTGTTA
TAGCCTCCTCTGGAAGAATTTATGCCAGATGAAGAAAAAAACTTCTCGAA
GTTCCCAGATGCCCAAATGAGGGCTTTCCATCCCTGTTAGCTGGAAAAGT
GTAAGTATATCTATATAAAAAGTCGGCCTACTTTTGCCAGGTTCGTCTTT
CACTTGCACTCTCTTGATCTTACTTTCTACTCAAAAAGAATCCAATACAC
AAAAATAAAATCAGTACTATTACTAATAATGTTGTCTAACGCTAAGCTCC
TTCTATCATTGGCCATGGCCTCTACGGCTCTCGGATTGGTATCTAATTCT
AGTTCCTCTGTAATCGTGGTACCATCAAGCGATGCTACTATTGCCGGTAA
CGATACAGCCACGCCAGCACCAGAGCCATCATCCGCCGCTCCAATATTCT
ACAACTCGACTGCTACTGCAACACAGTACGAAGTTGTCAGTGAATTCACT
ACTTACTGCCCAGAACCAACGACTTTCGTAACGAATGGCGCTACATTCAC
TGTTACTG
>210
TGAAGTGCTCAGAAAAGTTCTTGAAGCATAGCGAACGTGTAGGGCAGCGT
TTCCAAGAACAAAACGCTGCCTTGGGACAAGGCTTGGGCCGATAAGGTGT
ACTGGCGTATATATATCTAATTATGTATCTCTGGTGTAGCCCATTTTTAG
CATGTAAATATAAAGAGAAACCATATCTAATCTAACCAAATCCAAACAAA
ATTCAATAGTTACTATCGCTTTTTTCTTTCTGTATCGCAAATAAGTGAAA
ATTAAAAAAGAAAGATTAAATTGGAAGTTGGATATGGGCTGGAACAGCAG
CAGTAATCGGTATCGGGTTCGCCACTAATGACGTCCTACGATTGCACTCA
ACAGACCTTGACGCTCACGCCGTAGCGGGCGACAAGTCAAACGGAACAAC
CGTTGCCGTTCCCATCGGAGTCCGACCTAGGCCGAACTCCGTGAATTTCT
GATAACAACGGTCGGTAAAGACTGGTTCCCCAGTATATTTCTTCTCTCAG
GAGCAGGGGCCAATGCCAAAAGCGACATTAACCCGGAGGACAAGGCTCCA
CTGTGTTCCACCGAATTTCCCACCTGATAATATCTGATAACCCGCCCATA
GGTGGGGATCCTTCTGTAAACAGGTTTCTTAATCGTAGGAATTACCACTG
TTCCACTGCCAATCGCAGCTCCCAGAGTTTCGTTCCCAGCCGCGAGCACC
ACAGCGTACCATGTGCGCCACGAGGCCTCAAACGTAAAACAATCGAAACG
AAAAGAAACAGACTATAGGGGAGTATAGAGACAGCCGGCCAATAAGAAGA
GGAAAAAGAAATACTAGCGTTTATCAATGTGGGTCGTTAA
>211
ACATTTTATGTTTTTCATCCCGCACTTGGCTTTCATGAGAAAAGCATGTA
GGACGCTTGAGTTTGGCATGCGAGAGAAGAGGCGTGTCAGAAAAAAAAAC
GCCTTTTGCTCTTGAGAAGAGCGGCAAAAATTGCCGAACAGGTGGAATTT
CTCGACCAAAGGTGGGGTAAATATCGGTTACCCGTTTGCGAGTTCCTTTA
CAGTCTCAATGATTTCCAAGATGACTAAGGGAATATTTTCCATGGTGCCT
TTTGCCTCGCGTACACTCACGGCACTAATGGGCGATACGATACTATGATT
GTGTTCGGGATTAGTTCGATTCAATCATTCGCGCACGAGGCATGGACAGA
AATGGCACTGATTTTAGTCACCGAGTCAACAAAAATGAGGCGACTCGATC
AAAGATGTTTATTGACTCGTTTTTGCAACTAGAGAAAGGCATTCTTGCAC
GGAGAGAATGTTGACTTTAGTTGGAGTACCATTAGAGAGATGCCATTAGA
GAACATTGTACTGCAGTAACGATGAGTTTAAGTTTTTAAGTACGCATGTT
TATATATGAAAAAAATATACATTGAGATTACGAATATATATACTTGTCAG
GAAATGCCGGCAGTTCTAATGGTTAATCCTTGTCCTATTTCTTTACGCCA
TTTTCTTTGAATTGATCTTCTGTGACACCGGTTCCCATAGCAGCTGTTGC
GCTAACACCACCTTGAGCTAACTTCAATAACCCATCGATGTACTCCGCAC
CAGACCATTTTTGATGTTTCAACACATCAACACCATCGTCCATTTCCCTC
TGCTGAACATTCTGGGCATAAGCTTTCATCCCATCCTTGGCAAAGTCACG
AGAGAAGTTATGGACAGCTAAAGCGTTAGTGTGTAAACCGGCCAATGTGA
TAAAT
>212
CAGAACGATAAATGATTTCCATAAATAGTAAGGCCCAGCCGACAGCCTGC
AGCGCAAAAGTGAACCGTTTCCATCTAACTTGGATAATCTGCATTGTTCC
CAACGAATGACAGAATCCATCGCCAGATCTAATAAGGTTCAATTTTCTCT
ATACGACGGCTATAAAAGGAAGTTTTCCGAGCGCGCTTCGAAGCAGAATA
GGGAGGACCCCAGACCCGTTTTAGTGCCTGTCCCTTTTTAGTACGTGTTT
CCGTTTCCGTGCCTGGCTAGATCCATCTTTCTTCGCGCGTTTATTTTCAG
CACCATGTTTTAGGTTTTTACAGCATCGTTTAAGGAACCCAACAATACAA
TAGCGGGAAGAATGCACTTTCTCGTTCCATAAAGGGTCTCTTTCACCTAT
ACGGTTGGTACAGATTTCCAGTGTATGCCAGTCAGCCACGGCATTACGTC
GTTTGCTTCTATTTTCTTCGTTTTGAACTGCGTTTGTATGCAACTGTCCC
TTGAC
>213
GTAGAAAACGAAAATGAAAGCGAAAATACTCAAAAAAATCTCTAAATCTT
GCATTGTAGTGTGTACTGTGTAGTAAAGCTATTGTTTGTTTTTATTATTT
CTATGTAGAATTCTGTAAAAGGACGAAAAGAATGTTTCCAAGCAGTATGT
CTACCTCTGTCGTTGTAGAAGGGATTCCTACTTCTTTATATACAAAATGC
ACATCGGTAGAAATATCTAATTCTCTATTTAATTGAATGCATAAGGGGTA
CCAAAAAATCTCTCTTCACGTCTTATAGCTGAACAGTTATCGGATATAGG
CTACCACATAAAAGAACAGGGATGTCCTAATACAGCAATCATTTTTTTTT
TCATTACGTAAAAAGTAAAGTAAACCATCCATTCTCCCTTCTTTCAGTCA
AATGCCGCAGTCCCTTACATTTCAAACTGAAGCGTCGGGATGAGACTGTA
GAAAGAAGTAGGAGTAGTATGCAAAAAAAAAAAAAAAAAAAAAATATAAC
CTCTGCCGGAAGTGAAGGCACAAAAATAGCTCTCTCTAAATGGGCGGTGG
AAGGGTGTTCAAAAGTAAAGAAATATAGGCGCACTTCTGAAGTCATCGTA
GGTGAATAAGCAAGTCTTTATCGGCATGTTCGGGGTTTTTTTTACCAATG
ACGATTTCTGTCACTTAACTTTTTAGGCCTTCCGTGGTCGTGTCATAGCA
ACCCCTAGTTTTCTCTTCACATTTTGTCGCGTTTCCGTCGCACAGTAAGA
GCTGTATAGCGTTGAATGAATGTAAAAAATGCTCACTGAAGGACGGTAGC
CTTTACCAGTCTTTTACGTGCCGAATGCACATTTGTATATACGCCCACAC
ACATCGAAGATCGGCTCCCGATTTCTTGTGAGATATTTATCTGTTTATTT
GCTTATTTGTGATTTATGTATATTTACTTGAAATATTCTAGCATGTTTTA
GAGTTATTTATCGGAGTTCGGTCCCAATCATGAGAGTAACTCAGGCCAAG
ATCTAGCAAGTCATTTTGCTTTTTATGTCCATTCTTCATCTCCTTCCTTC
TGGTTGCCTTCATGCTGCCGCCGCGAAGGGATCGTTAAAGCCATCCATTA
CAACATCCACCTTATAATTATTCCCGTTGTTGTTGTCCCAGTACTCTTCG
CGCTCATAGTCGTTACGTGTAGAATAATGAATGCAAAATTCTAAC
>214
AGCGATTCTGTTGAGCAAAGAAAGCTGATATGATAGACAATGATACCTCA
CTGAAAACGAGGCTCAATGACTTTATTCGTGTTCCTGTGTTCTTTGCATA
TTTCAGCAATCGCTGAAATTTTTATAATACGTATGAAGCAAAAGCCCGAC
TCCGAAAGCTGTTGTGTGTAAATAGATTGAACGCGTTGGGAATGTAAAAC
GCGATTAAGAATTTCTGATTTAACGCAGGTGCTAGGTTATTAATAGTTTC
TTACGCGGATATGTAGGTTCAAGGGTCTATGTACGTATGGAGGAATAGCA
AAAAAAGAATGAGTATACTCTTGCTTATTTAGTTTAGCTTCAAAGCTGCG
GTCAGGCAGGTGATCATGATTATTAGCCCCCAGATAAACAAGAGAAGACC
TGTGTATTTGAAAATCTTTGTCGTCAATGGCACGGCTGTCTTGTGCTCAG
TTCCTATAAGCTTGTAGCCAAAGAGCCCGGGCAGAATGAAAGAAATAGAA
GTGGAGCCTGTGGCCCCAACAATGGCCAGTACACGGGCCAAGGAGGAAAC
CGAAATGGCGACAAGATATGATGCAACTAAAATGCTGCACGTTATAACAA
TAAAGCTCTTGCCTCTCAATGGAGTCTCCTTAGGCTGATAAATAGATTCT
TCTTCAATTACCTCATTGAGGTCAAGGCTACTGTCGCGAATCAACGGAGA
ACTTTCGGTAGCAACAGTGGGTTCATCCGCCGATGTAGCACTTATACTTA
CATTTTCCTCGGCGAAGTGTTGCAAAATCTGATGGATTGAAGCTCTTGCA
GGATGACACTGTAGTGGGAACGCCAGCATCACCAACAACACAATCGCTAT
TCTGCCGATGGTGCTCGAGACCGCTTGCGGGTACAGCATGATAATGTTTC
CAATGATGTTGTCGCCGAATGTCAGGTATCCAGCACAGCCGATCGCAATA
TATAAGATGA
>215
AGTACTGTCTTTTCATTGGGTTCTGAATATCCGTAAACCAGGAGTTAAAG
GATATTATTATCTAATATTATCCTCGAATATCTACGTCATGCCGGGCTAG
GGCGGATTCAACCTCACCATCTTGCCTACCTACAACCCACCGCACAAGAA
AGCATCCCACGCCGCGTGGTGCCTTTGTTCCTTGGTTCCTGAACTGATGA
TTATACTTTCCCCACGCACATGAAACGCATACCCCACCCCCACATTTCTC
ATTTAATATTTTTTAGTTTTAACTCCGGTGCGCGCCCCTTGAAGTTAAAT
TAAACTAACTGTCTGCATAGTTCAATAAACGATGTCGACAACGATTAGGT
GATTGGCTAGCCATCGCAACAAGCAGACATCAACTGAAACTCTAAAATGT
AGTCCTACAGACAAAAAAAAATTGTTGTTTTCAGGCTTATGTTCAAGGAA
AGGAACACGACAAATGATTGTCAATAGTATGTTTCTCTGA
>216
CCTGGATAGTTTATGAAGTCTAGCAGGCCTACTGTACAAATTCAAAACAG
AAAATCATCATCTTGCTCGAAGCCAGCCCATGCTACCTATGGCTCTCAGT
CGCCCATTCAGCTATCTATATATATCTTGGATGGCCACGCTAGGAACCGC
GCCGGGCAACAACTTGGGCAAAAGCCCTCGGAACAGTAAAAGCCACCTTT
CCGTGGGTTATCCGCTGAAATTTTTTGCTCCATTTCCGAAGCGTCGCACT
CGTAACCGTAAATGTAAAAAAACAGCACCCAATTGGGCCATGTGTGATTA
ACGCCGGGCGGCTATGCACGTTTGAACAAGTATATCCGCATGGAGCAACA
ACTGCTATAAGAAATTCCGTCAGAGAAATGGCTTGACTTGCTGCAAGCAC
AGAGGTGTTTATGGATAATATGTATACAATAACCTCATAGGTGTTTGGCA
GTGTGAATTCACTGTTCCCTGCGTTCCCGGAATGGAGAAAGGGGTATGAC
AGGCGCCAAAAAAAAAAAACACTGAAAAACAAGAGAAAAGAGTAAAGGAG
ATGGCTTGAATATAATATTTATTCCTTGCTAAGTTTAATAGCGTATTTTC
TTATATTAATTCCGTGGACGATCAGATGCGGGAATACAATGTTGGCAGTT
ATCTGTTTCATCGCTCCCTCCTTGCGTAAATATCGAACCTTCTATCATTC
GATAATCAAGAATTAAAACTGACAGCCGCGCCTTTTCGGCATCTTCTGGG
GTTGATCAAAATTATAATAAGAGGACTGCTGCATATTTACCTCCGTACAC
CTTCTACACCCAACCTTATTATGGGGCCTACTAAATTTTCTTTTGAGAAG
AATTGCGTTCTTTTCATCGTGTTGTGTTTTTTTGAGATCTTTCGCGCGAT
GGCATCTCACATTCGCAGTTTGCATGAAATTTCAGATAGTATTGACAGCA
TTCGATCGTGCACCGGGAAATAACGCTAGGCGTCTATCGTAACATAACAG
AGTGTTTTATTATCTATATAGTGATATTTACCTTAAATTCTTGCTCTTAA
GCGTGTCTCAATTTACTTTCAAAAAGAA
>217
TTCAAGTTTCGGTATCCTAACCGTTGATATTGTCCTTATTTGTCGACCTT
CAAATATTGTGGCTGCCATGTATATGAGCGCCTCGATCTATTATGACTAA
GCCATGCGATTGTCGTGTAATGGTATCGCGCATACTGAAGGTTTCAGCCC
TGTTTTGATGTGCCGCGGCAAAGTGGTTTTTCTCCATACAGGATGAAGTG
TTTCTTTCCCCATGCCGCGGCAAGCTCATCCTAAATAAATCTCAACTTTT
CAACTAAATGTACTTCAATTGAACAAATGCCAAGACCTCAAATGAATCAG
TATAAAAGCACCTACCGAATCAATTGTGGGATGTATAGTCTCTTGCCTCA

>218
TTTTATCAGTACCGGTCTCAAACCAACCCTCTACAACTTCATCGTGATCC
CATTCTTTCTTCGTTGTCTTCCCACGCTCTTCCGGACCCTCGTAAAAGAG
TCCGAAGCCGAGAAGGCGCGATTTCATGCACTATACACTCGTTGGCAAAC
ACAACAATGGACCCTGGCCAGTTGAACTGTGGTCCCTGTTGCGTCCACTA
TTGATATGCATGCATGTGGACGCAAGCACACGCCTGCATAAACGTTTAAT
TCCTCAGTATCCCACTCCCAGGGCTACTTATTCGAGGCATTTTCTATTTT
TGTTACTACTAGAGCCAGCATTAGAACTGGAAATACAGCAAAAAATTTTT
CACATTCTTATCACAAGAATGTGCAGGAGAAGGTAAAACCTGCAGGTAAC
TTGCATATATTTCAGTAAATTACATGTACTATACATCGTCAAATAATTTA
CATTTGTACAAGACCAATATCCGGGGCCCGCTAATTAGTAACGTGCCGTG
ATTCTTTCATTAGAACAAGTACAAGATGACCTGAACTTGCGCGTATTCAT
ATGGAAAATACGCAAGGCCCGGTTATTTCCGTTCTGGGATATTCGCCGAA
AGCTGCCTTCTGTTCGAATTGCGTCGTCAACATCCTTTTGAGCTTTCTTT
AAGTTCTTTCCTTCGAGATGGACGATGCCAAGAGAATCATCGC
>219
TAAATCCTTTTTTTTATTTTCTATTTATTTTGTTATTTATCATCTATATA
GCAATAATATACTTTGTTTTTATTCGTATTTCACACTTTTCTTTTTCCTT
ATGCAGGCAGTGTAATTCATTGGGGAGGATGATTTTCATGTGCGCATATC
TACCGGCTGCAAGCAGCCGGTCGGTGGCAAATCCGGCGCTTCCCCCTCAA
AAAAAAAAAAAAAAAAAAAAAAAGGGAACTCTCAGAACGGGGGAGGTTGA
AGAGCAGGCCAAGGGAAATATTAGTTTTGACCTATGTGGGAAACAGAATT
TTCAATGAGTTATGGCAACTTGGCCGAGTGGTTAAGGCGAAAGATTAGAA
ATCTTTTGGGCTTTGCCCGCGCAGGTTCGAGTCCTGCAGTTGTCGTTATT
TTTCTCTTTTTTTTCAATTTCCCTTGTT
>220
CCTGAAGAAGAATATGCAAGATATAGAAAGACCGTTGCAATATCGAAATA
TTTCCTGTTGGATAGAACGAACTTCTTGGCCCCTTCATTGAGAAGCGTAG
CTGATACACATTTTTGGTAAAAGACCTCATGGTAGCAGCCCCTTTCCCCT
TAAAAAGACTTAATATGGCATACTGTTTTTCTTTTATGCGCTTCATTCCA
CGGCAAAAAGAACCTTTCCCCGCCCCCACTCTGCGACAGGAGTTTGCCGC
CCATCTCCACAATAGGCATAGTTGTCGGTACCTTCCAGCGCTACGTCAGC
CTCTTCCGGGCAAAAAATCGACGTAGCATGGAAAAATGCATTCTAGACAG
CTTTATGCGTTACGATCCCCAATCTATGCTCCCTGGGGAGAGTTTGTACA
GGTTTTCTCCAAAATAAAA
>221
TGATGGCAATATCCAAGTCGTGAGAACCTTGTCCCAGAAGCTTGTCACGC
ACCCATCCGCCCGTGATCCGAAGAGTCAATGGCTCAGGCTTATTGTGGTA
CTTTTGATTGTACAAGTCTGTATAATCGTTCAGCAAGTTACAGATGTTCT
GTTCCACTTTGGTTAAGGTGATTTTGGGTGCATTTAGAACAAAATTAGAA
TTCGTCATCGTTTTCTGAGCAGCACTATTCATCAGTAGAGATATAGTAGA
CCGTAGCATACACAAAAAAAGCCCTTATAACCCACGGATACGAATTAATC
TCGAGGGAAGCGTTGCGATGTATTATGTAGTTTCCTTTAGTACATTGTTA
ATATGGTAGATTTTTGCGATTCATTTTTCAACTTTTCAACCCTAACGAAT
GTTTTTTAGGGCTGAGTAACGACAAGAACACAACCCTAAAAATCAGATGA
CCTAAGGGTTTGGTGAATCGAGAAAGTATGCCCTATTTCCCCCGCCCATA
CACCCCATAAGCCTTAACCGCAGCCCTCCTCTCCCCTAAACGTTTCTTTT
TCTTTTTCCATTTTTTTTTTTTTTTTAGTTTTACTTTCTTTTTATTCGGA
AAAATCTTTTCTATATTTTTCAAGGGTAACCTCATCGCCATGCAATTAAT
CACATAGACTCCTTAAGTAACAATGGCAAGGCGATAATTTTAAGAGAATT
GCAGACGCTGTACATAGATCGTTATCAGCAAAACATATATTCGCATCGAA
GGCGTTGCTTGTCCCTGAAGTAGCTACTTGCGGTTTTCATCAAGCGGCCA
AT
>222
AAATTTAGAAGACAGCAAGACTAACCATTTGATAGCGTAGTAAGGCTTAT
CTAGAAATGTTGGACAGATAGGAAGAGAAAGTATAATAATGGTGTATGGT
AGATGACTCTATAATCGTGGTCGGAACGTGCAATATATGAGAACGATGAA
TGCATATACATATGTCGCGACTCCTTTTTTTCCATTATAGCGGCATCGCT
TTATTTCGCGTTTTAATTCATTTTCTTTTTTCTTCATTTCTTTCTGCATA
TGCAAACGCGGCAAGAAGTGCCCACGGATCCGAAGAAAACCTAATACATT
GAAGTTTCTCTCCCTGAGATAGGAACTCTCTCTTCTGCGTCAGAAAAAAA
AAAAAGTACTCTTTCTGCATATATTGCTCACTACTGACTCACTGATCCTT
TTACGAATAGTTGGGCAACACCTATTAAGTTGTAAAACAATCGCGAAAAA
AAAAAGAAAACAACCAAGGCATCCCACTTTTCGAACCCTGGCGCTCGGAA
GACTTAATCATTGCGAGGTCTCAATTGGCCGGACCGCCACCATGCAGAAA
AATGGTGGAAAGTGCGTGCGCGTTTCTCGTGCCACGTGCTTTTAACCTAA
ATAGGATACAAACTATCGGCTTATCTTTAGACACGCTCTCGCAGAACGAT
GAGCTACTGACATTTTGAGTTGATATTCAACCTTTTAAGGTATCTCAGAA
TGAGGCTCCGGCGCCACCGCAAAGTCTACCTTTTCTTCTTTAAGCCTTGA
GTTTCTTCTTTTGCGAAAACGTTGCAATGTATTAGGCAAGATTATATT
>223
CCCTTAAATTAGTGCATCTATCGCATTTGTTCCATATTCACATTCACAGT
TCTCAATTGAGCAGAACGAGCTATGACTACCACAGTTTTGCGACCGGGAG
ATAGAGCGAAAGAGCTGCCATGACTGCGATGACTCTAGCGAAAAATATTG
GCCTTTTGCACGTTCGCGACTAAACGAGTTCGATAGTAGTCCCGTTTCTG
GTTTTTTCCCTTTACCGGCCCACATTTTTTCACCTGACTCCGGTCCTGAC
GTACGACTCTGTTTGTAAGTCACGTGAAATATTTCCTGTGGCTTTTACTA
GTAATGTGCACGTGATGTGGCGTGATGGTCCTTTACCCGGAGTGCGGGAC
CCTGGTTCATGAAAAATTGTGTGAAATCAACTGCATTTTTGGAAGCGAAA
AAGATGATGAACCTGAGTTGAATGGCTGTGGGAAACCAATACTTGACTGA
TTATAAAACAAGAAAAAAATGCCTAGTAAAGATCCAGAGAGCGTTATAGA
CAAAGAAATACGGAAGATATCAGCAAGAAATGATGAGCTTATCAAACA
>224
ACGGGAGAATACGAAATCTGTATATTAAAAATGAAAAAGAATGTTTGAGT
TAGCAGACAGTACCAGTGGCTGCAACGTAGCTTGCTTCTTTTGTTTTTGT
TTTTTGTGCAACAAGAGCCGTCTGATATCTTGTGTTCTCAGGTCATTTTC
AAGAGCGTGTTTCACCGAGGGGAATATGTTTCAGGATTCGCGGCGGGAAG
ATTTTTGCTTGCATTAAAGATTTACTTACTATACAGAATAAATAGTGGAA
TTGTTAAATATTATTAAATAGATAAGGGACCTGACTGAGCGCTCGCTCCC
GACTAGGCCAAAGACATCTTAGCCAGCTCATATACAGCCTCTTTGGACTT
GGCACCTCCAATGAAACCTGCTGCATGAATGAAGATACATCCTGGCACAC
CGCTCTT
>225
CACCAATATTGAGTCACATACTGGGATGCTAGTCCGGACTATGGATATTT
TCTTCTGTAAAGGGTAGTGAAAGATGACGTTGAGTGTTAATTTTGTGGTG
ATTGGCTTCAGTTTTGATTGTTTCGGATGAAATGAAAAAGTGACGAAGTC
AGATAAGTGATCGCTCGGATGAATGGAAACCTGGGGCAAAAGGGAACAGT
TTTTCTCATCGGATGACGAGTAGCAAAACCCGACCGCCCAAAGCATCCGG
GTTACGAGATATTTACTTTTCAATAAATAGATTCAATTATTATTATTTTC
TCGAGACATATTACTGACACAAGAAATTTCCTATGGGAGCTTGATTTAGT
TTTTCCTTCTAACATTGTCATTTTAACTGTGTTGCCTTCCCTTGCTCGCA
ACTATGCTACGCTATATTGTACTCTTGAATTTTATTTATGTTTTGTTCCC
AGCGGGCATCTTTCAATAAAATGAACTCAAGAAGAAGTAAATAATAACAA
GCTATAATGGGTGGCCATTTGTGATCAAATTTGGAGTGAAACACGTATGA
TTATGTTTGAACTCTCTTTCTTTGATACGAAACCTCAAGCGACGTAGGTG
ATGGATATATTCACAAGATAACAAAGGCCGTGTTACAACATTAGATATGT
AA
>226
GAGAACTATATCCTGTCGCCAATTATGTGCAGTTGATGAGAAAACTAAGA
TAGAAATAAGTAGGGATGGAACCAGGATCCACAAGAAGCGCGTTTAGCCG
ATCCGGCTTATCAGGTACGAGAAGCAGTATTATTAAGTAAGAAAGCGCGC
AGGAAAGCGGCCTTTTGAAAGCACGTCTGCAGACATCTCACGACACATTC
CCAAATAGGGCCCTGCTAAAAAAAAAGCAGCAGAGCGTACGTTGCCTGGG
AAGCATGGTTTAGCGTGTTGCTATATTATGGTAAGGGGGGTGGTCAGTAT
ACGTTGTGCTGACTGCCAGAGAATATCCTTATTCACAATTATTTGTTGAG
TTT
>227
ATGAAAAAAAAGAAATTAAAGACTCATAATTATTTATTGATAAGGCGAAG
ACGTAGCAACTATATGTACGTAGAAGTCAATGGCAATCGCGATAAAGCTG
TGCATTAATGACCGAACGCGGGCGGCAGACATTTCTGAAAAAGAGTCAAT
TTGTACGAATACGCCCCCCACTCGGGAAAGGCGATAAAATCGACTGATAT
TTAGTTCCTTGAGGCCGTTCCATTGGTGACAAAAGAAAACATGCCGCTCG
ATTTTCTAACACTAAGCAAATCCGCAGAGGAGTATTGCAGTCACTTTGAC
CGAATAAGACCAGTATCCATCGATTTTCTGTCTTGGATGACCTCTTTGCT
GTTCTCCACAGGTAAATCACTTAAAAAAGATATGAGATACGTTAGATTAA
TTAATTTCAGAAATTAATATGATTACGGAAACTTGGTTGAAAGTGGCTGA
ATTTACGACGTAATCTGTCTTGACATCTTTTTTTTTTCAGCGAGCATTCT
CTAGGATTTTTTGTTTACTTTCCACTTGGATTTTATCTGTAGGCTTTATC
AAGTTCCTGTATGTATGGTTGTGCAAGGCACTCTTCTTCATAAAGGAAAA
GATGTGTTGAGA
>228
TTGGCGGACCTCAATATAAGCGACATGGAGAGATAGAGATAGAAGAATTT
GTTATTGTGTTAATAAATAAAGTTAACATCCAGTTCTTTCAAGTTGGCTA
AGCGCCGTGGCGCAGTGGAAGCGCGCAGGGCTCATAACCCTGATGTCCTC
GGATCGAAACCGAGCGGCGCTAATTTTTCATTTCTTTTTGCCCGCAACAA
TAACACAGATCGCAATCATTTAAGCTATAGACTATAAGCTTTAACTTCTG

>229
GATAACTGTTCATAGGAGCATGCCTCGAATATACATGCGAACTCGATCCG
ACCAAAGTGCTAGTCTCGGAAAGCACTGAAGTGCGGTCGGTGGGTAGAAT
GCTTGGGCAGTCTACACTGTCCTTCATGTTCTATATGATAAGTAGATCTG
TGTTGCTGATGGAGAAGGGAGATACAATACGGATTTTCTATGAACTTTGC
AGTGATAAGAGCACCTACGCTATTATAACACCGATGTTAGAATAATATGC
AAGTTTGTGGTCTGTGTATACAGTTCTTTGTTTGTGCTTGAAGTGATGAT
GTTACATGTCAAAGAAAGAAAACCGCTAAGGTCAATGAAAATATAGTGTT
ACATCCGCCGGTGCAAATGGCGAGGAGAAGATTGGACTCTTGCGCATCGA
ACACTACCTATCTGCATCCATCCATGCCAGGTGCGCAAACTGTTGGGTCT
GGCTAACACCACATTCTCGCTGCGCTGTGTTCTCCGATGACGTTTTGCCG
CAAAATATTTTTTTCATGAAGGTCTTTTCTTTTCGTTCAGCGTCAGCGGG
CCCAAATCTCAAAGTCGCCGCCATTCTGTTTAATGTTTAAAGTTTCCGCT
CACTACACCAAGATGGCAGCAGGAGATGCCAGAAAAAGCGTGGGGTCTGG
TCTGGTTAGATATTAGAAGTACATACACATCGGTGGGTGTGTAGCAGTGG
CGACACATAAAATGGCCATAATGGGGGTGATTTTACGTATAGCATACATA
GACATCTGTCGTTGAGGTTCGCTACCAGTGAACGGATTTAACGAGCAAGC
AGCGAAAGTAGCCGAAAACCTCTTATTGTTAATAGTCATTTAGCAGCCGT
TCTGCTGCTGTTTTCCTGTGGGGTGAGGTGGGCTGTGATTCGGTAAACTC
GCTTGCGGTCTAACAAAAACAGAGAAAAACTTGGTACAAAAAGATTTCAT
TGGACGCAACCGGAATCGAACCGATGACCTCTTCCTTGCAAGGGAAGCGC
GCTACCAACTGCGCCATGTGCCCAGAATTTCTGTATGTGTTGGATCTCAA
CACGGGGTACCTCCGTATAAGCAATTTTAACCCGTAGATGATTTTAGAGT
TTCGTTCCTACACGCATGAAAAAGGTAAGATTGAGTATGCCTAAGATGAA
CCAATCAAAGTTATAAATACCTGAAGAAATGAGTTTAGATCTGTTGGATG
GTGAAACATAAAAAACAGAATGAGGAATAATCGTAATATTTTTATGTAGA
AATATCAAGTCCATTGTAAGGATTCTAATATCCTCGAGGAGAACTTCTA
>230
GCTGTATTATTTGTAAAACAGCTTCTAAGTATACGAAAATTATAATAGCT
TCAAGTTTATATTTTGTTGCTAGCGTTACGGTTATGTTTTTACGATACAT
ATCGCCTAAGCAGGTCTCTGCGCCTAAAAAAAGTAAACATATAAATTGGG
AAAGCAATATAATTAAACATACTGCTATAGTAAATTCATTACTAGGCCAA
TTTAACCGTGCCTTATTATGATATGAAATACCAGTCAACAAGTCCC
>231
ATACAAAATGGAGAAATGAAACAGTTGAACCAGAGCGCCGCATTTGGCAG
GTAGTTTCGCTAAATTTCCTCATGCGCGTTTGTAATTATGCTAGTTAACC
ATATGATAAGGTTGCCTAACTTGCAGTCACCGGAAGGTTATTTCCGGAAT
GGTGCAGAATAATTTTTAAAATAGTAGCATATATTTCGTTCCAATTCCCA
AATAGGGAATTATAATTATGACAGATAAATTCCCGATTAGGAAGAAGCGC
GAAAATTCTTGAAAAACTTTTTTCAACCTCGAAGAAAATCGTCGTCCTTC
GAAGATTTAGTGGGAATCTTCAAGGTGGATAGTTTCCAAATTAAAACTGC
AGAAGAGGCTTTTAAAACATGC
>232
GTACCCATGTTACCTACTGGACTCCCTCCAGCATCAAGTGGTACCTCATG
TTCAGGTTTTATTGGTGGTAGTTGTGTTGTAACTGGTACTTGATCTGCCA
TTAAGAATGTAGTGATGAGTACTGTAACTGGTTTTATTTTTTTTTTTGAA
TTTTTATTTTCGTGACGTGCTTTTTTTTCCGTTTTTGGTTTTAATGCCCC
AAAATAAAATAATCCCCTTTTGTATACGTTTTTCTTTGCCTGCCTTTTTA
TTTCTCAGTGCATTGCCCTTTCTTTCGCAAATTCATGTGTTTTAAGGGTA
ATAGGAAATATCACGCTACCTGACAAAAAAAAAAAAAATTAATTTTGGCC
TGGAAAATTCTTCTCCTTAAATACAAAAAGATTCTTTTTTATAGAATGTC
ATAATTCACGAACAGTTAAAAAAATATAAACACACAACGTAACACAGATG
CCGGGTTACGATATCCGAAAAAGTTGATTAAAAGAAAAATAATCCTTCCC
CGCCAGGACTTGAACCTGGAATCTTC
>233
TTAATAAACTGAACTAAAATAAAATATTTTGTTTTGATTGCGAAGTAGAT
GAGTGAGCTGTGTGGCTGGTGAGTTGTATAATTCGCTAGTGAAACTGATG
GGCAAAAAAAATTTGAATTTAGGGGGGAGAGTAACCTGTGTTGTGAGTTT
TTGTTTTGTTTTGTTTTGTATATCTATTATATAAGAAGATAAGTACTGTC
AAGAAGTAGAAGATTTTAAAAGGTAAGACAGCGAGCCGAAACTTCTTTAA
AGAAGACTAAAATTTCGGAATTGGAAAAAAAGGTTGGAGTATTTATCTTC
CGTATTTAAAGTCGGAAATTTTTCATCTTTTTTTTTCAAGATGTATGCTC
ATGCACTTTATTCCCCGAAGATCTTCGAAAGCAGTTCAATTTAATTGGCT
GGAGATTGGCGTTTGGAGAGGCGGTGTGTATGTCAAGAAAGGCATTGTCA
ACGCCCGGACAAATAATTCTAATTTTTACAAGATGCCGGTGGTGTTCGGC
ATTGTAAAAGGTATGGGTGCTTTGTGCGTCCACGCATGGGGTATGGGGTA
TGGGGGCATCATCGATTGTTCTCCGGTAACGGAACACGGCAATATTTCTG
TTCTACAGCTTGAATACATGCCGTGGATCTGTTTATCAAAGATAATGTCA
TGTAGCGTGGCAAGTCGACACAGCAACGTGTGGATAATGGATGAGACGAT
AGCGCCACTGGTTGGTTGTTTGTAAGCTTCGATTGGTAACAGTGGGCTAA
AATAGATTGTAGTTATACCCCCACGTTTGCTGGGTCTCACGATCCATATC
AGACTGCCCGCGTGGGGTTAATTCTGAGGTGTTGAGCCAGCCAACTCAGA
CGTTTTGATGACGAAGAACAGAAGATGCAAGTCTTCTACGTATGCAATGA
TCTGTCCAACTCACCGAAACAAGAAAAAATTTTGCGTTTTTTTTTCCTAC
AAATCCCCCATTTATTCGGAAGGTGTGGGTGGAGGCGTAGTTTTTTGTTT
ATTTTTTCCCAATTTACGTAGTCCCGCAGGTCGGTTTTCCTCTCAGTCTC
CGTACATTTCTTATTTTTTACGTTTAAAGTTCGTTAACGAGGCAAAAAAT
GGCCTGTCTTCCTCCTTTTCCGCCGGCAACTGTAACTGTAAACTGTAAAA
TTGTAAGTGTAATTGTAATTGTAACTGTAATTTTAACGCTGAATTCTTGC
GCGCTCTCGTTGGTTACTATCTTTTCTTCTTAATCGAAGTGTGTACAGTT
ATGTGCCGTTTGTTTCAATTTGGCTGAATCTTCCTCATCTTGCCCCTTCT
TTGGTGTTTTTTTTGCGCAACTCAAAACCTCGTTACTGCATCAAATTTAA
ATTTAAGCTAGAGAGAAGGTAGTGAGAAAGCTATTTTGTT
>234
GTAAATGCGTTCTCAGCAATATCATATTGTGTTTATGAAGTATTACCAAA
CGGGTAGAAGAACGGTTTAAGAGAATATGTCCGGATAAAGCGATCAGGAG
AAAAGCTTAAAACCCAAAGTGGTCAATCTGCAGCCCATTTAGGCACTCTG
CATTTAACCGATACCCGGATTGAAGAAAGCTGGCGGGTGTATGGGTGAAG
GAGAAGAAAGGAAGTGATTAGGAGAAACCTCATGGAGATGAGCACATGCT
ACAACTAATAACGTTATTCTACTT
>235
ATTACGTTCATAGGGGTGGGATTTATATTGTAATTCCGCGAGGTTTACAC
GAAAGATATCTCAACTCTAGCCGCACATCCATTCCGGTATGTACTCTCCC
ACCATTGGGTATTATAGAATGTAATAGGTTTCAAAGCGGATATCTTTTGC
CCGGTGAGTTGTTACTTTTTCATTCGAGCAATGAAGTACATTCTAGAAGT
TCCTAGAACCTTATGGAAGCACCAAGAAAAAAGGAAGTTAAACAAAACAC
TG
>236
TCACTGCGTATAAATGGACTTTCAGGCGAGTATATTCTGCAAAAATATTT
TATAAGTTCCAACGGTAGAGGTGACTCACTTGGAAGCTTTTTTTTTCAAT
CGTTGGCTACGTGCGTACACGTGTTTTGCGGTCTCGCTTCGAAATGCCGA
AATGAAAGAATTTCCGGGAAGAGTCACGCTGTTATCAATGACTTTGCAAC
TAATAAATTAACTAATAAATATTTTAATTAA
>237
CGGTGTGGTCTATGTATGTTTTTCCGGACGCGTTCCGCCGTTTTGGTTTC
TGCCCCAGAACACCCCCCATAAAAGAGGTTTTTCCGAAGAGTGCCTTTCA
GTTTTTCCGAGATCTTTATCTTTTTCATCCGTATTATGTAAACCTGAATA
GCCCCTTGAGCAATTGAGTTGCATAATAGCATGCAATTGCATATTGAACC
TCCTAGGACTTAAAGGTTATTCGTCAACTAAGGAAAAATATGCTCATAAC
TTACATATCTCGTACACCCTAAAATCCCACACAGGGATTAAAATTAAAAT
TATGTTTAGGTAATGAA
>238
ATCAATCGTAGACGCAGATCTAGCGTCCACAGCCCTAGGAATACTCAAAG
AGTCTCTCCTTGAAGGAGAAGTGAGCGTGTGAAAATCATTACCATGCAAA
CTCCTCCTCGAGGAAGAACCCTGCTGTAACATGCTGATTAAGAGTGAGTG
GAAGTAGTAGCGAGCGGTGGTGGCTATGTGTTTAGCCTGGTAAAATGAAT
CCTATTGTGTCAGCACGGAAAAAACAACAATAGCAATAATATGACAATAA
ACAAGTATTTTGCCGTAGCTCTCCTTCAGTTATTTGATGATGAGTGTAAA
CAGATTACTGTATATAGAGCAGTAGTAAAGAAAGCTGAAGTCAAGTGCAG
ATGAAAGACAAATACAAAAGGAGTACGCCTGTATTATATTTCCAAGTGCG
TAATTTTGAGGTATTAATATTAAGTAATTATCAGAAGCAAGAAGCCAACA
ACCAGACCGCTTGGGCTTAAACTAGCATATCAGCACAATCTGCAAGTATA
CATTTCTTTGGTGTCTCGAACGCAACGCGGTGCAAACCGCGAGAACCTTA
ACGATTTTTCACACTCCTTCCTCCGTTGCTGCAAGAATCCTCGAGCTAGC
CCTTCGTCCGCTTCCTTTGGCACTTGAAAGAAAAAATTAGCTTTTCTTTT
TCCTCCTTTCTTTTTGTCTTTCTGGTGTAGGCACAGTTGGAAGGATGGGA
CACCTAAAAATCTTATTTAAGAAGTCACAGACGGTAACGCAGCGCCTCGT
TTCTAAATCGTATAGCAGGCTGAGCGCCCGCACACCCACCTGCGGGAGTT
ACTCCGGGGATCGTATGGGGTGATGCATGCTCTTTCGTAAACCTTAAGAA
TAGCGTTAATTTTTTCCTAAATAGGAATACACATACTCATGCTATGTAAC
TGTAGAGAAAGGTACAGATTACATGAGGCGCCGGTTGTCGTTGATACATA
TGTGATTACGTTTCGTCCTTGATAATAGAGTATAATATATATGTGCAGAC
ATATATAGATATAAATACATTGGTATATGGATATATATAGATGTGGTATT
CATTTTACACTAAGTTACATCGCCCCGTTCTGCTCAGGCACTCTCTTCCT
CCGGTTGTGTTTGGCCTTCTTCTACGCATAGACCTTCCCTTAAGAAATCG
AATTTTTCGTCGTTTAAAATTGTTTTTTTTAGTATT
>239
ATGTAGCATTTTCAAGGCACCTCTAACAATAAAAAAAACGACACCAGCAG
GATTTGAACCAGCGCGGGCAGAGCCCAACAGATTTCAAGTCTGTCGCCTT
AACCACTCGGCCATAGTGCCTATCATTATGAATTTCCCAAAAAAGAACCA
CTATCAGAGACATATAAAAATAAGAACACATCCACCGATATCTGTTACAA
TGAAACCCTAAAATATCATCCATTTGGGGTAGTATTCATGCTACCAGTAT
ATCCTGTATGCGTAATATTATAGCCTTTTCCAACAGTGCACCCAAATATA
ATCACAA
>240
AATTAAGAGCATTTTAAAATTAAGTCTACAAAGTAATACTTGGCATATTG
CTTAACTCCTCACGCAGAGCCTTAGCGTACCACTATTTTATCTGATACCA
CAAAAAGCTGCGCTTTGATGGCCCAACGGGGATATAATCGCGCCACTGCT
ACTCATGTGCTGCAAACTAACAGTGCCAGCAGAAGCGAGCATTGAAAAAC
TAAACTTTGCCTTGTTCTGCTTACTTCATGCAGAGGTACAGCTTCGATGT
CCTAAGGTTGAACATCATCTTGCTTCGATTTCGGTAGTAATCATTTTGCC
TGCACGCCATTGTATGAATCTCGTGCCACTCCCTTTTTAACTCCGAGATA
CAACTTTCCGTGGGGAAAAGTACCGTAGTATTGTAATTTCGAGAGCATCT
TTACGGTAATTGCCCCTCCACACCCAGACGTTACACAACCCTTAGTAAAC
AGCTGCGGAAAAAAAGTGTGCCTACGCACTGTACGACTCCTGATTGATTC
CTTCATTAGCACTGACTGGCTTACGGTGCACATAAGTTATTAAGAGCAGT
TTAATTCAGTTGCTGAATAGTCACGTTGATGAGCACGAATACCTGAAACA
CCAACGGTAATGAATCAATTGGCCTAGCGCATCGTTGTGTGCTTGGGTGT
GCCGCACAATGGCAACCAAATACTGCTCGTTCCTGCACTTCGAAAGAAAA
GCAGCCAAAAGAAAACGCGTTTTCCTTTGCGAGCGCTGGTTTGTTCCTCA
GTTTGATAGAGGCGTTCAATTGGCAATTTGGGCACTAACACCGATGATAA
CAAGATATCTTGACTTTGACCTCTGATATTGAGGCGTTCCAACCAATAAG
AGGGGCTGACGGTTGAAAATAAGGGTAAAAGAGAGCTATTCGGGTTGGGT
CGCAGATTAACTTAGAAAACATGTACATGCAAATGTTGTTTTTTACGTAC
AGAAAGAGGCTGATGGAACCAAAGGAAGCAATAATTTGCACCTTGATATT
TTGCGCTTTCTGCTTTTGAAACCTTATTATATGCCTTTACATATACTGTC
ACGCGACATTTTCACCTTCTACAGTGTTTAATGAAAATCTGGCTTGTGTG
CATTATCTTTTTTGTGAAAGTT
>241
CAATGGTGAATTGAAGGACGGTGTCACGGACGAACAAAAGGCATGGCCTG
GCGTGCAGCATCCGTTGTTTTTTTATCAGTGCGATTTGGGGCCCGAGAGC
AGAGTGAGAAGCACGCAAAGAGACATAGTCGGGTTTACGTACGAAAACAA
ACACGAATGTGTAGAAATCGTGAAGATTATCCAAATACTAATGTTGGACA
AGAAGGTTCCGCTGGAAGAAATTGGTGTCATAACGCCCTATTCTGCACAG
CGTGATCTGCTGTCTGACATCTTGACCAAAAACGTAGTTATCAACCCCAA
ACAGATTTCTATGCAACAAGAATACGATGAAATTGAGCTATTTAACGCGG
CTGGTTCTCAAGGAACCGCCGGCAGTCTACAAAACAATGTGATTAACATC
ATCAACGGCCTACACGTCGCGACCGTAGACTCCTTTCAAGGCCACGAAAA
ATCTTTCATCATATTTTCATGTGTCAGAAATAACACCGAAAACAAAATCG
GCTTTTTACGTGACAAAAGAAGGTTAAACGTGGCATTGACAAGAGCCAAG
CACGGACTAATTGTGGTGGGCAACAAGAATGTCTTAAGAAAAGGAGACCC
CCTATGGAAAGACTACATTACCTACCTCGAGGAACAAGAGGTCATATTCA
CTGATCTCACAGCTTACTAGCCGGCTAGGCGGCGGCAAGAAAATCCACTG
TTTATGTATTGATTGCGCAATGCAGAGATAGATAGATATAGATAGATAAT
GGACGTAGTTATAGAACAGAAAATCGGTAGATCGAAAACACAGGGGAAAA
AGGGGGGGGGGGGGGGGAGACAGCGCAGCCACGTGACGGGCTTCCTCTTT
GGAAAGTGGAGCGAAGTTTTGCGGAAGCTACTTTATTCCGGCCTGGAGTC
AAAAGAGGAAGCTCGGTGGCAAATAGCTTCCTCTTTGTGGCCGGGGCGCG
GGGGGACGAGGCAAAAAGCAAAGAAAAGCAAAAAAAATAAAAAAAAAAAC
AAAAAAACAGGGGTATGAGAAAAAGACACGCTTTTCCACGCGCAGCAAAA
AGGAAAAAGGAAAAGGAAACTCTTTATTATTGGACCTTAAACCTGAAAAC
GAGACGAACCGTAACATAAAACCGTGTAGTTTCTGCAAAAATAACTTAGT
TTTTCCTACTTTTCAAAATTGAGAGCG
>242
CCCATCATCGAGATCATTATCGTCGCAATCATACAAAAGATACCTTCCCA
CAAGTCTTCCGCGCTTCCGAAAATATCCTTCTGCAGCGAATAGTACGCAC
CGATGAAACCTGCACCGATGGCCAGACAAATGATGAACCCGAGTAACACA
CCGACCCAAACCTGAATCCTTAATTTACGGTACAGCGCCCGGTCATGTTC
CCCGATTGCCTGTTTCAAAAACGATAGCAGCACGGAAATAACAATCACTG
CTTCCAAGCACTCTCTGAACACAACGAAGAAAACGGCCACGTTAAACACT
TTGTTAGGCATGGCGGGAAGTATATGTGTGATGACCTGCTGAGAGAAGAT
TTCGACAACGTACAATCCGTCGTGTTATGTATTTTTTTGCTCACATTGAG
CATTTTATATAACTAAAAGCTCAAGGTCGAACTACAGCCCATCGCTTCCA
CCGGGCCTTGCAACACCAACTTAGAAATCGGGTGCATTCATCTACGCTGT
GCAGAGAATGAAATGCGCACCTTCTTACTGCTGCGACGGTGCTCGGCACG
GCTTACGCGGGCGGGGGAAGGAAATAGCGGCCTGGCGTGAGTCGGCAGTC
AGCGGCGGGCTCACTGTACTCGCTCGTTTAATGCACCAGCAGTATTCGCG
CACTTAATAATAGTATTTCTGCACCCTGGCCTGGAAAGAATGCTCGATGC
GCCCTGGTTGATTGGCGCAGAGCGTGTGTCAGTGCCGGACCCGATTTCTT
TTTTTCTACACGTTGGTCTGATGTCTCAGGAGTTAGTAGTGACCGTGGTC
AAGAAAAAAACAGGACGAAAAATTGTTGAGAACGTATACGTATATTGTAT
TCTTCTTTTTTTTCTTTGCTGCCCTTTTATTATCTATTTCATTTTTTAAC
CAGAGGCAATCGT
>243
AAAGAAAAAAACGCGTGGCGGGTAAAGAAGAAAATGGAAAATAGAGGCCG
GGTGACAGAGAAATATTGAGGGTTAATTGGAAAATATGTTAGGGTGAGGC
ATATGTTTTTAAGGGTTTTGAGGATCCGATAAGGAAGAATGTAGGTTAAA
TGTTGTGCATTAATTGCTGTGGCAGCTTACCCGCTTCCCCACACATTTTG
GTAGTATCTGTCCTCTTGTTATTGTTACTGTAATTGTGTATATATGTTCT
CGCGTGTGTCTTATTTACTTATTTAGTTATTATATTATATGGGTCTGCAA
GGTAGAGGCGCGCTTGTTCAACAGCAGCCCCCACCGGTGTTGGTTAAACT
CTGTCCCTTCAGGTTGACGTTCCCTTTGTCTTCCTTCTTCTGAGTGGTTT
CGTTCAGGTTTTGTTGGGACATACTTTCCTTGATTTGTCTAGCCATGGTT
AAAAACGCATCCTCGACGTTGGTGGAGTCCAAAGCACTAGTCTCTAAGAA
CGGCATCTTATTCGCGTCCGCAAATTCCTTTGCCACGTCATATTCCACGA
CACGCTTGTCCTTTAAATCACACTTGTTACCTACCAATAGCTTCAACACT
GTTGAGGTTGCATACCGATCAATCTCTTGCAGCCACATCTTCACGCCGTT
GAAGGATTCTTGGTCAGTGACATCATACACGATAATGATCCCATGCGAAC
CACGGTAGTAAGATGAAGTGATAGTACGGAAACGTTCTTGACCTGCAGTG
TCCCAAATCTGTAGCTTTACAGTCTTGCCGTCCAGTTCTACAGTCTTAAT
CTTGAAGTCCACTCCAATTGTGGAGATGTAGTCGTTGGTATATGTGTCGT
CCGAAAACCTCAAAAGTAAACAGGACTTCCCGACACCGGAATTCCCGATC
AACAGCAGTTTGAACAGGTAATCGTACTCGCTATTCATATTAGTGCTTTT
CTTGTTTTATTTATTTCAACCTGGGCCTAACAGTAAAGATATCCTCCTCA
AAACTGGTGCACTTAATCGCTGAATTTGTTCTGGCTTCTCTTCTTTTTCT
TTATTCCCCCCATGGGCCAAAAAAAATAGTACTATCAGGAATTTGGCGCC
GGGTCACGATATACGTG
>244
GAAAGAAACTTTTTCTTTTCATCAACCCCTTAAAAAAAAATGCATAGTTC
TTAGGTCTTCCATTTTTTCTTTTGTTGGTTTTTGCAACCAGAGTATTTTT
CCTGGTTGCTCCAGTAAGGTATTTCGCTATCTTCCAACAAACGGGGCACA
CGTGCGGGAGTTTCAAAGGGGCAGAATAGTGGGGTTCAGGGGCATAAGAA
GCTCACACAATGCGGAAAAACAAAAGGGGACTGCCATTCTTCCTGAAACC
CACGCGTCACTGCTATACTGAGATCTGGCCAGGGGCAACCAGTATACTTA
GTGGATAAACGACAGGAACACGTACTCCTTAAAAGCGTCTAAATCTTCAT
TTTTCCGGTTTATTTCCAACCGGGAAATAAATTATTCCTAATAAAATTTC
CGGGGTTTGCAGGATGC
>245
TGAGCACGGAATCGCGCATGGAAGAAAACACACCAGGTAAGCCTTTGGAA
CGCCATGTGTAAGGTGCAATGCACATGAGTGATTGTTAAAAACAGAAAAG
TAAAAATTCCGATCTTGTCTGGAGGATCAATCGTCCTCTCAGTGCGTTTT
CTTGGCGAGACAATTCAATTCGCTTTATGCTCTTTTTTTTTGTGAATTTA
GCCAATTCCGGAAAAAACATAAAAAAATGGTTATGCATTCTTTATTTTGA
AGAATGAACTAGATATACAGTAATATACTAAATTGTCAGCTCTCGGCATA
ATTCAATGGCCGGAAAGTAGTACTATTAAAAAGAAGTGCGCTCAAAGAAT
AACTCCGGGAATAGGTGATGTAGCTTTTGGTGCTGGAAGCGAACCGCTTT
CATGTGTTTTGGTCCCGGCTGTAGTGTTCTGCGGAGTTGCACTGGTGCTG
TTGGTAGAGATTACGATTTTGGTAAATCCTGGTGTGACGGCTACATCAGT
ACCTCTAGTTAGACCAAACACTAATTCAATGCCAAAACTTAGACGCCCGA
TGATATTCCTTGTATATATATTATTATCCGCTATGGGCACAGAAGTATGT
TTAACAGTAGCAGAAGCGACTTATGTATGGATGTCCAACAACGAAGATGC
CACAAACGTCTTCGTAGTTTTATCCACGGCGCCAGGTCTGGAGAATGGAC

>246
CCTTTACTGGGATACAGTTATCCAGTTTCTGCATGTCATCACGCCAAGAA
TTTGACGATTTTAACGGTAGTGATATATTCAAGATTATGACGTACTATTG
TCTAAACCGCTGCTACGCACAGATGTCCAACTCAAGAACTTCGTATCGGC
TTTCTTGTGAAGCCGTGGGGCTCATTAAGTTGGCGGGGTTCCATCGCGAG
GAAACTTTGAAACTTCTTCCTTTCGATGAGCAGCAGCTTGGAAGGAAAGT
TTATTATTTGCTTCTCTTAACGGAAAGATACTTTTCTGTGTATACGCATT
GCGCCACGAGCCTGGATACCACGATTGCTCCACCACAACCGGAGAACGTA
ACGGACCCCCGACTATCTCTCGACAGCTTCTTGGAGATGATTAGGGTATT
TACTGTACCGGGAAAATGCTTCTTTGATGCTCTAGCTACCGACTCTGCTA
ATGTAACCTGTACTGAAGACTCCCTTAAAAAGATA
>247
AAAAAAAGAAAAACCTGGAAATATAGTCACGTGACATGAATAAACAAGAC
CTAGGGCAATATGGAAAAAGAAGCTAGGATAAAAATACATTTATGAGGGT
TGTAAGGCAAAGTGGCTCAGCATTAAGTAGGGCTAAAAAGAGTCGCAAAT
ATACATCGTACCGAGTGATGAACGTGGTTTTGAACACCTTGTTCTCTTTT
GTTCTCGCTCCCTACATTCACTAT
>248
ATAAGTCATACGAAAACGTTCTCGAACTTTTTTTCTGCAAGCTTTTCAGA
ACCACGATGGAAAAAAGAAATTTTTACAACACTAATGCCAAGTAAGGTTT
TTCGGATTTAGGGTGGCGTCCTGAAAAAAAAAGAAACGTCTCAGAACGTT
TCGGAGAAAAAAAAATAAGGTGTCAAATTTCTTAGTGTTTTGACGGGTGA
TGCCCTTCCAGATAAATCTCGTGGAGATTGGCTAGCGTCAAACGTCACCG
ATCTCTATTTCTTTTTTAGGTTATTAAATTTCGATTACATCGCGTGTTCT
TAGATAAGTTACCAAGGGTGCTCAAAGGAAAATTATATTTCTTTTTTTCT
TTTGAGTAATTGCA
>249
GGGTTAATTTAATTTTTAAAGAGGGCATTTATCTAAAAAATGAAAGACAA
CTATAGGGCTGGTAATTATAGAATAGGTCTTAGTAGGGTTATCCCTTCCT
CTAGAAAAAAAGAAAGAAAAATAA
>250
ATTTCTTATTAAGGATATGTAAGATGGTATAAATAAAGAAAGTCGTTTAT
GAAAGAGAAAAGAAAGAAGAAGAAAAATCAAATTTACGGCAAAAACAATA
AATCAATGTTAAAGCACTAGTAATTGCCGGATGAAAAGGTTCAGAAATTG
GTTGCGGAACGTTTTTACGCCGGCCAGGGTTTTTCATAGACCATTTATGA
GATATTATACAGCAATATTCTAGCACAAAAGATAATCAACCCGAAATATC
AATTTCATAGGGTATAAACCCAAGAACCTCTTGACCGGTGACTTTTTCTC
CGAGTTATATTCTAGACCAAGCACCTCTTTTCACCTAGCACATCTTATCC
TGTTCCTGAAAAATACAGTTTATACGAGCTTGCGTGTTTTCCAAAGAAAA
GAGCAAATGCAAGATTCAAGATTACTGTTCTTGTTTTATTTGCACTTATC
CAATCAAAAGCTCGTTTAGGGATTGTAGAAGAGCTGACTATTGTAGTTAA
ATATTAGGGGAAATGAATATATTTTATCATGGGAAATACGTGGAACGTGT
AATATGTTGTTGCTGCTCCCAAAATAAATTTACCTGACGAAAACCTTATA
TTTCCGGAAAAAAAAGCTTAAAGATAAAAGGTTAATTGTACTTTTAAACT
CTTGCGGAATCTCTGTGCTCGGAGAAAAATATCCTGGAAAAGAAGATGCG
GGGTAGGCGGACTTAAAAGATAAGTGCACATTTTTCCGGACTTCGAGTGG
CGACAGACAGCCTGTTAACTATTTTTGAGAATAATTAATCTTTAGGGGGG
TTTTAGTAAAACAAACAAAAGACTCAAAATAACGCCAAGAACATCCGAAG
AAGTCCTGGTCGCGCTTTTTGCTGAGGTGGCTTTAAAAAACTAGTTTGCT
GAGAGATGTAATAATGGCTTTAACAGATAATTCCTCGTTTGGCCACATTA
TCAAAAGGCAACCTCTTTCTGAAAACGGTATAGCCGGAAATGACTGCCGA
GTTATATTATTGTTCGGTATACTCAAGTTATTGGTACGAAATATACGATA
AGAATCTACCGAATTTTCATCCATTTAGTGAGAACGTTGGGTGAATTGAA
AAAGGTGATAGAT
>251
CCTTGTTGGAAAGCCATTGTTATGTTATGTTTAGAGTATGATATAGGACT
TCTCTCTCTTTTTTTTTTTTTGTCCAGGTGGAGTGCGATTTGTTCGTTAT
ATGCCTCATTCCTTAATTTTTATCAGTCAGAACGTTATTTCGCGCTGCAA
GTTCCTTACTTTTCCATAGAGTTCCACAGGATGTAAAGAAAAATAATGAT
AAAAAAAAGCAGAACATATTACCCTTCTTTTGGAGCGTACTTCCATCTGT
TACCCGCTCATCCAAATGCACATTCTGTTACCCTCTTGTTCGGTATTTTT
CGGAGTTCTCCTTTTCTCCTTCTTTTCCTCTTGATACACAGAAAAGTGGG
AGAAGGTAGGGGGAGTCAGAGAATGAAGAAAAAAAGGGGACGCGCAAATC
CAAGTGAAAATCTCCGGGAGCGGGCGGATCCCACTAACGGCCCAGCCGAA
AATGGAAAAAAAGGGTCGGTGATGTGTGGGTGCCAGCTGGCGGTAGCAAT
GACGACGTGTTGACGGGCCCTTGGCTCTTGGGACAAGGACTAGAAGCCAA
AAGCCAGAGGCGGTAAAAATAGCAAGACTAGAATATTGCTGGCATCTGTT
AAGGGGATATGTTGCAACTTGCAGGGGGCGGCACAAAATAACATAGAAAC
GTAGTAAAGAGGGGAAAAGGAAAAGGAAAAGGAAAAGGAAGGAAAAAAAC
CCATTGACGTAGAAATTGAAAGAAGGAAAGGTATACGCAAGCATTAATAC
AACCCACAAACACAGACCAGAAGCACTCTAGACGGAGAGTAACTAGATCT
ACAGCCCCTGGAAAATCGTTTGGTCAACTTTGAGGTTCCGGTCGTCCCCC
TCTTGATCTGA
>252
GTACTTGCTATCTAGTAAAAGATAAAGATTGAGAAACAGTCACTAAATTT
AATAGAAGCTAAGATGCAAGGATTGATACTGTATTAGGATAATGTAATAT
ATAAAACGGAAGGAGAAATAATCGCAATATTATTATGTAGAAATACTGAT
TCCATTTTGAGAATTCCTATATCCTGGAGGAGAACTTCTAGTATATTATG
TATATACCTAGTATAATAGCGTTTACCAATACTGGAATCTCAATGATTAT
CAGATTACTCACGAATTTCTTTAATAGAATAATGAATGATACCATACAAA
ATGGAAAAATAAAAATTATAAAATTTTCATGTACAATTACAGATTCCTTT
TTGGGGATTTCTATATTCTCGAGGAGGAATTTTAATGCATTCCGTATGCC
CATTAATATGGCATTTGATAACAATGAATCCCAAAAACTGTTCCAAGATT
CATATATTTCTCGCACCCGTTCCCCTAAACTTTATCCCATCTTAGCGGGT
TGAATCCACGTTAACGTTCCACTAGTAGATTTTCCACTTCTGTTACACTT
ACTGCGCAAGTGGCTCGTTTATCGTTTATTTACTTTGAAACAGTGCGACG
GCACTACAAAGGAGCGCGTAACAAACGTTACTATCCCGTTTCATTGTTTC
AGATTATCACCATAGTTACATATGTAGGGAATGGCAACCAACCTGTTCCA
ACATTCTATTCAGACCGAGAAAATCCAGTAGGACTTAACGGTGGTTCCGA
AATTCTATTTATATCATTGCTATTAGCTTTATGTATATTGGCAATTGAAG
CGGTTCTTCTTCATGACATAATAGTCCATCAACTGTTCGTGCAATTGATA
CAAATTAATTTTGAAGGCAATATTTAAGTTTGGTTTTCTTACGCAGAATA
CTTTTTAAAGTATCAACTTTCGTGCATCAGCTTCTGTCAGGTT
>253
ACCAATATCTCAATTCCATCTTTAGAAAAATTAAGTTCAAATTAACGGAA
ACAGTAATCAAGTAAAAGAGCTTTTTTTTTCTTCTCCCCTTCCTGCCCTG
AAGATAATTGAGTAAATGTTACGTTGAGAATGGCTTTTTGATATTTCATT
AGATTTACTTCATTATTCTTCTCTATTCTCCCCTTTCATCAATTAATTGG
GCGTGTGGCGTAGTCGGTAGCGCGCTCCCTTAGCATGGGAGAGGTCTCCG
GTTCGATTCCGGACTCGTCCAAATTTTTTTACTTTTAATGAGGTATACTG
GAATATTACGGCTCTTTTTTTTTAGAAACATATTCCTCAAATGGGTAAAC
GGACCCTGGTGCAAGGTGTGGGTGCTGAGACAAATACGATCTGAGTTGTT
TTAAAAAGGAAAACAAATGAATGCGTGCCCAAAGCGGAAAATTGGTCAAC
ATCGATGCGTAATTAGTAGGCCCAGGTGAGCCTGTGCCGAACATGTATCT
CTGCGCAGATTACTATATATTCCCGAGCATAACAGCATATAGTTTTCTTT
CACATAGGCCTTCCTCCAACTGCCATCACTGTACATAGACGTTTCGGCAC
TGTATATTCTTGTCCCTTTTTTTTTGCCTACTACATTGCTGCATTCAAAC
GATATCGCTCTGCGAACCGTTTAAAACTGACCAAAATAGGGAGACCTACC
TTCTAAGGAGAAAAAATTCGCATTGCTAAAAAAAAGCTAAAAGAGAAAGA
GAAGAAGAATATTAAACCAGTATAT
>254
ATTATCGACTGGTAAGCAGAAGGTGCTATAGAAGCCTACACCACTTTTCC
GATTTTTTTTTTTTTTTTTTTTCAGGAAAAACATCTTCCATCAATACTTT
GTCATTTCTTTCTTCTTCTCTTCTGTGCTTACATAGCCATAAGATGTCAC
ACAAGGGTGTCTGTAGCAATTGTGAATCTTATCGTTATCGCAATCTCTGA
GATGTCTCATCCAATAAGAGGGGCGCGTGTCCGCAGAGATAAGCAACCAG
GGCCTTTTCTTTTGCACTCAGCCTGACAAAGGGAGGGGAGGCGCAAAACA
AAGTTCGTGGCAAAGGACAACCGTAGAAGAGCATCGCCATGTTGATTTTG
AAGAATGTCAAGACACAAGTACAAGTTATGGATGTGCATCGCAAAGGGAA
AAAGGGGAGTGGGGGAAAGAAATACGTTTGTCCCTAAGTGCTCTTATGCT
CCCTTTTGTGCTTCAGAGGTTCTTGATCAATTATTAAGAGGGGATAACTC
TATCGTATATAACTTTTATCTTAAAAATGGTTCAGGTAGTGTTTATATAG
GCTCAGTCTTTCTTATCTGAAAAAAAACAGTACGGGATTTTTTGTGCGCT
CGAATAGTGCCGAACTCAATTACGGGCTGTGGTAACACTTGAGATCTTGT
CTTCCCTTACAAATAGCTCTAGGGGTGTTGCATGTAGCCGCAGTAACATC
TTGAAGAAGTGTACACTTTTGAGGGGACGCCATTGTGTTACGTTCTATGT
ATTGAATAGTATAGTTTTCAATTTTCCTGCGCTGACGTAAACCGGCTGTA
AGAAAAAACGTATAATCGAGAACTGGTTATTCAAAGGTTGAACTTTAAAG
TGAAAAGTAGCTCTAACAAAATAAATCATGCGTGAGAATGCAATGTCTAC
AAAGAAACTTCCCTATAAATTATCTGGCAGCAGCAAAATAACAACTTCCA
TACCTAATGATTTAATCATACTGCGAAATAATTGCATAAA
>255
GATGTTCATGGAAAAGCACGTGCCGTGCCACTTCCAACTAAGTTGAATAA
TGTTCCGAAGTTCAAAAGCGTTGCGGCGGGGTCTCACCATTCAGTCGCGG
TAGCTCAAAATGGCATTGCCTATTCTTGGGGTTTTGGTGAAACCTACGCC
GTTGGATTAGGCCCTTTTGAGGACGACACTGAAGTTCCAACCAGAATCAA
GAATACTGCTACACAGGATCATAACATCATTTTAGTCGGGTGTGGAGGCC
AATTTTCCGTGTCTGGTGGTGTTAAGCTGTCTGATGAGGACGCAGAAAAG
AGAGCGGATGAAATGGATGATTAAGGTAGTAGTACAAAGATAAATAAAAG
AAAATCGACATAATGCACCTCAGTATAAATTGTAAAATATAACATAAATC
AAAGAAAAACGAGAAAACGATATGATTATCCGATACCGACAAATTCTCAT
GTTTATTTTTTTTTTTTTTTTTTTTTTTTTTTAATTTTTCTTGGGCCTTT
ACATTGAGTACAGGGGCATAAGTGCGAGGAGTTACCAGACGACAACTAGC
AGGCGGATGAAATCAACACTGAGTAAGTATTATGTAATCCATCCGCTCGT
CCAGCCCTTCAGGTTCTTCCTCTTCTGCACGTTTCTCTAGTAATGAACTT
TCTAAGGAATTTAATCGGATTTTTTGAGAAAAACGGAGAAAAATTAAAAA
TGTGCCAAGACACCAGCAACAGGCAAAGCAAAGGATAAACTTCCGGTGAA
CATGTTAGCACGGAAAAATTCATTGCTCTCTCTAACCGCGACAAATTACC
TATCGTATTTTAACTTTCTTCAACAGCATTATGGAAAATGCATACCGGAG
ATTGCTCATACAGACCATAAAAACAACAGAAAGTCTTGTGAGGAAGATAA
GCAAGCACGGTAGGTAAACCAGATATGCACATAAATTACCGCTGACTCTC
CCCTAAAAGAACTATATTGATGGTCTGACATATAAGGCACCGCTGAAAAG
CATGTACAATTTTAATGTCTTTGCATTTGCATAGTCAGTGTGGCGTGCAT
TCTCCACAGAATCTAACTAATCAAATGTATCGTGACTGGGTGTTGCATCA
TTTTCGCGAATAAAAAATAGAACACTGTAGAGTAGCGCAGCGCTTTTTTT
TTATTGAGGCCCTTTGCAGAACCAAGGCTGCAGTCTTTTCTCTGAAGATT
AGCTTTGCTAATATAAACAAATCCGTTAAGTTCTTGGGAATTTCTTTGAA
GGGGGGGAGGCGGAAATGTAGTGAGTTGTTTTTACTGTGATTTGCTTTTT
CTTTCGCTCATGGCTTATTTTCCTTTCCTTTTCTTCCCACATTCAATAAT
GCAGCGTAAATATAGAACAAGATTACTTGTTTATACGAGATATACGGGCA
GTGAATAAAGTGGTACTAGAACTAATTATCAAAAAGAGTAACTGTCATTC
AACATTTCTGGCTCTAGACCCAATAGGACATAAACTTTTAGATTTTTGAA
AAATGGCTTGGCGCAGCACGGTAATACTAGTTGGTTTTTTAAGCCTACTT
TCGCCAATAAAAAAAACTACGAAACAGTTCTTACTTACCAATATCCCCTG
CCACTACACTGTACTTTAGTGAACCCAACATCACGAATAAGAAACAATAA
ACAATAAACAATAAACAAGTGTTGCTTTAGCTCAACTTGCCCCTGAGAAA
TAACAGCGCAACTATCAACAATGAATGCATAGCATGGAGTAGAGTAAAAA
AGCTTTGTTTTGGCCCCGCCTAGACAAGAGGCAGCTGCGCGAAATAAGAA
ATTATAAACTCTTGTTTTTCTATACTGCTCTCGCTCAACCTTTTTTTCCC
ACGCCTATTATCGGTTCAAGGGACAGCAGATCCGCTCTGCGCACTGGAGC
AGAAACATTCCCAGTTCGGTTCCGACTAAAACCCGCCTTCCCACGCGAAA
TTCTGGGCCGTTCAAGGCAACTTATTAGTAAGAAGAGCAAGGGGAAGGTA
CATTAAAGCAAGAGAACCGTGCATGAATTTATAGACATTTTTCATGGGAG
GTAGGGAATTTTCAGACTTTAAGTTACACCCCATAGGGGCAAACATACAG
CAGTGGTTGTTATCTTTCATTCGCGCCAGGAAAAGCCGCTACCCACACTA
AGTGACGTGTAATTGCCGTTCCCTTGTTTTGAAGCACACTGAAAGCTGAA
GTGATCATAAGAAAAGAAAAAAATAAATGCTGAGAAGGGTTTGCAAAAAA
AGAAAGGTTCCTAGTATATATATGGAAGGCTTCGTTAGCTTAAACTTTCT
ACAGTCATGCATACAGCAATTTTTTTAGAGCATTACTTCTTGAGTGGCAA
AAGCATTTCTTTTTTTTTTCAGTATAGGAAGTAATCACTGTAGAAATAAG
TCAACAAT
>256
TTAACGTGAAATAACGACTAACGGGCAGGCGTTATGCACGGAAAGAGATC
TACTAAATTCCGCCCAATAGGGAATCTCCGACTGAATTTTTTTGCCCTTT
GGTCAACTATTCCCGGGAAGGGCATAAATTGAATCAAGCGCCAATTTTAC
GTCTTCGGCTAGTAATCGGATCAGCGGGAGAAACATCGTACGTACACAAG
AGAATACCGAGAGTGTCGATTAATCAACCACGCTCCATGAGGCTTATCCG
CATTCTACTTGCATGTTAGCCGGGAAAAGACATAAATCATCTCAATTCTC
TAGAATACTCTAGAGATTATGTAAAAGCGTAGCCCCGTAGATGATTAAAT
AATTTTCGGTTTCTTACCCCGTAACCACGAGTTGCGGTGTTTTTGCTTCT
ATCGGGGCAATAAGCGGGCGCTGCTTCTCGGGAATGTAAAAACTGTGCTT
CCTACCATGAAGTAGTTGGATCTTGAAATGGGTTGGGCCGGAACAATATG
CAAGTACTACAATCCTTGTATTCCCATATGATTATATTCCCCTTTGCATA
GGCTAGTGTTTTTTTTTTCGTTCTTTTGTTTCTTCCGCTAGGAATAGTAG
TGGCGATCTGCAGAA
>257
ATTACAAACTTGTAGTGTTTTTTTTTTTTAGGGGACTTGCATGAAAGTTA
AATTTTATAGAAGTAATTAAATAGTCGATTTCCTTTCCTGTGTGTGACGA
ATCTAGATTTTTTTCATGTAAGAGACCCCGCCCTGCGAGAGGGGCAAACA
ATTCTAGCAGAAAAAAATCAGTGGAAAAAAAAAAGAAATTCCGGATATGA
TAGAATATTTCTTCGAGAAACCTTTTGGATGAGGAGTGCCCTTCCATGAA
GAAATTCTTCCTGCATCAGCACCTTCCCGGCAAGGCATTTCATTTTTTTT
TTCCGAGAAGAAGATTTTTAAGTGGGCTACCCCACGCTTTCGGTGCCTAT
GGTAGCTGCATGATCACACAATGCACTCCCATTAAGAGTTTGTGAAGTGC
ATGAGATTGACATCTCGGCGTCCCTTAGTTTCCTGTCGGATTTTCAGTTA
TATGGAGTGGGTGAAGTCATTATCCGAATATTCGCGGATCATTGACGTAT
AAATA
>258
ATAATGGATAAAATGGAAAGAATGGAAAGGAATTGTAACATGCCTATATA
TGGAAAACGAGCTTTTAGAGCTTTCAAGTTAACCCCGGGCGGTTAGTGTA
GTGGTTATCATCCCACCCTTCCAAGGTGGGGACACGGGTTCGATTCTCGT
ACCGCTCAAGATTACTTTTTTAATTTTCATACTTTTTCTCCTAATATCTT
GCAAATCATGACTGAATTGACATTAACTGATGCAAATGGGTGGGAAAAAT
GCTTATCAACCCCCTAAAAAGTCAACTTCTTCGTTAGTGATTGCTATATG
TGGCGTCAAGAATTACAAGAAGCTGGCGAGCTTTCCAAGCCCCTTCAGGA
TTAACCGTTTTTTACCCTTTTTTTACAAATTTACGGCGGGGAATAATTCT
GATACTTTCTCTTTATGAGCATTCCTCAACAGGGATCGGCACTCAATTGC
TTTAGTGAATAGTTTTTTTTTACGCCAAGAACATTTACCACCCCATTTTC
CTGTAGACGTCCAAAACGATACTCTACTTTAAGCCCTTTTTCTGAAGTTT
TCATAAAATGTCCGATCTCCTAACGTCATTTTTAAAATCAAATGGTCTTT
TAATAATTATG
>259
TGGGTACCGTTAAATGACAGTGTAAACAATTGCAGAAGGAAATGTTACAC
TAGCGGTTAAACAATACTGAATTAAAGATTTTTTAGTTGAATATGATATG
ACAGTTATATACGTGAGCAATATAAGTCCCCACATTGAGTGTATGATAAC
TACCGGAATTACTATCATATTGTTCGTAAGCAATAATAAATCAATTAGTG
TGGGTGTTTTATACCTCTCTCATATGAGTATATAAAGATCCTTATTTAAT
TTTGATTATACTATCTTCTAGCCTTCAATTATCGACATCGCTCACTTGAG
CAGTTCATCTAAGAAAAAAAGAACTATAGCTAAATAACCCAGTATTATTT
GTTTCGCTGTAGGTTGTTGCACAAGGGTTTCTTCTGTGAACATTTTGAAT
TGTACGCTTAAGATGATAATACCTAACTGATTCCAACCTATATTAGTAGA
ACCGAAACATACAAATAAGTGGTTGTTTGGCCGAGCGGTCTAAGGCGCCT
GATTCAAGCAATATCTTGACCGCAGTTAACTGTGGGAATACTCAGGTATC
GTAAGATGCAAGAGTTCGAATCTCTTAGCAACCATTATTTTTTATCTTTT
TGGTTCTGTGATCAAGCTACCCGCGTTTGAAGCCGACTAAAGACGAGAAA
AATTAGACCTTCATTTTTGCCTGTTTGCTGCATGTAAAAGAATGTTGGTT
GAACATGTCGTTTAAGAGAAGAAATCGGGTACGGCGCTCTGGCTTTTAAA
ATTGAAGAAATTGGTGTTCTTCCGGTTAATACTTTGAACTCGGCTTTTCT
TAACATGTAATAAAGTTTGTTACATCTCCCATAATTAAGTTTCTGGAACA
CGCATTGTTCTAT
>260
AAGATAAAGGCAACAACCGATGAAACAAGAGTAAAGGGTATACTCTTTTA
TGCAAATGCTCCTTTACGCGACTGGTCATTATTGAACATCGAACACTTTC
GAATAGTTTAGTCTCAAATGTATCGAACGCGAAACTTTAAAAGCGCATTC
TTGTTCTTTTTTCGCGACTTGCTCCTGTGATCGTCTTATTTCTGCTCCAT
ATTATCTATTCTTTACTTAAAGCTTCCTAAAAATGCAGTCAGGATAAAAG
CAAATGCTTCAATGGAGTTAATATATATACCGAAACAAGAAAATGAGTTC
TATATATTTGTTCCATGGACTC
>261
GAAAGAAGGGACGAAGAGGATAGAGCTAAAAATGGAAATGCAAAGGAACT
GGCGCCTATACAACTATCGGATGGTAAGGCCATATCTGCAGGGAAGGCTG
CCGCCATCACCCTTCCTGAAGGCACTGTGAAGAGCGAGAACTATAACGCG
GACAAGAATGTGTCTGAGAGCTCAGAACACGTCAAGATCAAATTCGACTT
TAAGAAGGCTATTGATCACTCAGTTGAAAGCTCTAGCGAAGACGAGGGAT
ACAGAGAGAGCGAGCTACCTCCAACAAAACCCTCCGAGAGAAGCGCGGCA
GAGGACCGTTTGCCATTTACAGCAGATGAACTGAACATAAGACTAACTAA
TCTGAAGGAATCGCGCTACGTGGACGAACTGGTGCGTGAATTCCTCGGCG
TCTACGAGGACGAGCTGGTGGAATACATTCTTGAGAACATCCGCGTGAAC
CAGAGCAAACAGGCCCTTTTAAATGAGCTAAGGGAGACTTTCGACGAGGA
CGGGGAAACGATAGCTGATAGACTGTGGAGTCGTAAAGAATTTCGCTTGG
GGACCTGAAACAGAAGGGCCTTGGCGCGCGTCCCAAAAGGGAAAGGCTCG
CTCTGAAACAGGCGAAGACACGAAAACAAATTACCGTTTCGGGGCGTTTT
GCAGCAAGTGGCTAGACACGTCGGGCGTTGCCAGATCAAAATAGCACCAG
TGGGTGTTTTTTTACTATCTCATCTTCGTGCTGATATATATAACTTTTAT
ACATTTCCATAGTACCAAGTTCTTTATTTCCTGCATTTTTACATTTATAA
TAGATTACCAAAACTATTCGACCTCACCAAGGGACCCCATAATATTGCTA
AAATAATCTTACCTGTTTTTTACCATTTTTTTCTTTTTTTCCAGAAGTAA
TAAGCTCTCTCTTAGAAGAACTAAAAGCATCTGACTTCGGCTCGTTCCAA
CCGACCAAAATATTTGTGAAAATATTATTCATTCCTTTAACGACTTATTG
TGTATTCTGTTCATCTCTAGCTGGCTTCCACCTCGTTTCCTATTTTTATT
GACTTTTCATTAGGCTTCCTAATTATACCCATCTATGCAGTTTCCATTCG
CTTGTCTCCTATCGACCCTTGTAATTAGTGGGTCATTGGCCCGGGCCAGC
CCCTTCGACTTTATATTCGGCAATGGAACGCAACAAGCTCAGAGCCAAAG
CGAGAGTCAAGGTCAAGTTTCTTTCAC
>262
GTAACGTAAACGTTATTCTATATTTATAAAGACGTCAAAAAAAAAAGTGA
TTGTGATATTGAGATGTAAGCTATATACCGAACTTTGAGCTCCCTCACGT
GGAAAATATGATAGATTGTTGCCTCATCATTGCGGAACCGCATTTTTTTT
TTGTATTTTTGCCTCCCTAGTTTCAAAATGCACCAAATTCTCCCCTTAAT
GCTTTTTGTTTTAAGTCCCAAATAGCCATCCTTTCATCATCGGGCAAGAT
AGAAATTTGACTGTCATTCAGTTGTAACACCTGTTTCAGTAGTTCTTTCT
GTTTGTTAAGCACAGCTGGATCCACCACCTCGTTCACGCTATTGTTATTC
GTAGCCGATGCCTCTTCTTGCGGCCTGGAAGCTAACGGGATCAAATCATC
CACTTTACATATCCCATTCGTTAGCAATAATTC
>263
AGGAGTAAAAGAAAAGAAAAAATAAAGGTTACCCTGCAGTTTGGATAGTC
GGGTAACATTTGGCCCTTTTCCTCCTTGATTGGATATTATTACCCCGATT
ACCCCTCATCTTGGGAGTGCCCCGCTTTTATTTCTCCCGCCAATCGGCTA
TTAACGGCTTTACGTCATTCCGTGGGCGGGTCAAGCGAGCCGCTCCCTGG
TTTGGTCACGCAAAACCGAAAGGCTCAAACAAAACTAAGGCCATCATATA
TATATATGCGGCTGCGTGCGTGTATTCTCCCGGATAATATGGTGCGTTGC
AATTGGAGTATTGGAGAAAATTTTCTTTTCCCTTTCATTACGGCGGA
>264
TTCCAACCACCAAAGAAGCTTACTGGTACAGGCTGAAGTTTGATGCTTGG
TTTCCTCAAAAGACTGCGGCAGACACTGTCATGAGATGGATTCCAAAGGC
CGATTGGGGTTGTGCCGAAGATCCTTCAGGTAGATACGCCAAAATACACG
AAAAGCACGTCAGTGCTTAATACGAGCGCAATCGTATTCTTATAATTGAC
GAGTGAACCAAGAAATGCGGTGATACAAACGGATATTAATCTATATAGAT
ATATGTATATAATAAAAGTTTTCAATCTGCTGACCCCTTAGGTTACTTAT
CTATAGGATTCGAATTACGATATGAAACCCTTTCGGTAGATATCACATGG
AATACTGCAGCCGATTGATTAGTTAATTTCTTATCTCGCTTTTTTTCTCT
TTATCTATCTATCTATCTATTTATCTATCTATCCTTATGCTGCAAAATGA
AAAATTCCCTAGGAAGTTCGCGCTATCAAGGTTCTTTTTCCCACGTATCG
GTCCCTGAGTGGATCCCAAAAAATGTGTGGGACTATGACTATATATATAA
CAGTCACAGTTGAATCATATTAATGTTCTATTTCTTGAGGTGATTTCAA
>265
TCACCTTTTGTTCTTTTTCATGTTACTAACCAGCAAGTATTTATATAACA
TCCATTGTTGCATGAGGGAAACCAGTAACCATACGCTCTAATTATATCAC
ATTCCCGATTCGGAAACATTGCTTCTTGATCGAGCGAAAAGAAACTGCCC
TTGCAATTAATAATGTCATTTTCGTATCCCATACCACGAAAAGCAAGCCC
TCAGAGGTTCTAATGCATTATAGCTCAGATCTATTTTTACTTTCCTGGAA
AACGCCATCGAAATAGTCGCCAAAAAAATCGATGGGCTGGGAAAACGCGT
CATCAATTCAACCGAATAAGGAAAACTAAGCCACTTCACGCGGTTCGCGA
TATTTGTCCAGCCTCTTTTTCCGAAAAAAAAAAAATTAAATAATAAAATG
AAACGGACAGGAATTGAACCTGCA
>266
ACATTCCAACAAAAAAGGAAAAATAAAACAATAATTTCGTTCCCCATCTA
TCCTTCGCCTCTCCTTCGCTCTGTAATTTTTTTTACTCGCGCGCTTCCGA
CTTTTGAAAGAAGGAGCAATAAAGTTAAATAAATGTAATTAAATTATGCT
TTTTTAGGCAAGTTCGGGACTTTGTTGCCACGTATTGCTCTTCTATGCAA
GCACTTCACTCCTTTTCTTTCATCTCTGTTTTCTTCCACTGGCTGGAAGC
TTGAGGGTTGCCTCTTGATTCTTTATCGCCTGCAACCATTGCCTTGTTCC
GTCCTCTCAAGGCGTTCCTTCCGTGCTTTTTAAATACTAGAATCATTCGA
GACGTATTTATGAGCATGTTACTTCTTGATGTTTATCTAAGAGGGTTGTT
TAGGTTATCCGCATTATTTTTAAAGTTTTAAGGTTACATCATTTATTCAG
ACGCGTTCGGAGGAGAGTGCATTCACCAAGATGTAAATTTCTTCAGTTTT
CCGGATTAGGATTGGAAAAATGAA
>267
TTATTTTGAACACAACTACAGCCTCACCACGGTATTTTTTTTTCCTTTGA
AGAAGTATCAACGACTTAGGGTGCAATAGCATTACCCATCCCCACATTAT
GATGCATTATTAAACTTAACTTTACTGGCATTGGCTACCGTCGCCGGGCC
GAGGGTACAAAATCGAGAAGTCATAAAATCAGGGTTATATGTAAAATACA
GTAGGGCATAGCATTATATAACGGGGTTCTTAAATAGGGCTGAAAGAAGA
ATATTAGGTAAAAATTCTACATTTCTACGAGCCCTGTTTTATTGATATTT
CAATATAAATACAATAGTATAACAATAGTGTAATAATAGTAGATGAATCC
TAAAAATTGTAGGCAGAAGTAGATAAGAAATTGTATATTAAGTTATTGTT
TATAAGCATAGTCACAAGTGCATAAAAACTATGAACGGCATTGATGATCT

>268
GTATTCGTTCTTTTGTGTTTTATGAAAAGGGAACGTGATATAAAAAAACA
TCCTTTGGTGTGGGACATGGGCTTTTGTTTAGAGAATGGTTATCACTACC
GCCCCCACCCTTGAAAGCCACAGAAAATGAAAAAGTATGTGAATAAGGTG
TGAACTCTATAACATTTTGGCCAAATGCCACAGCCGATCTGCATATTCCA
ATGGACATAATGCAACAACAATTGATGTCACATTCTCTTACACACTTCGA
TTGGTCCGTACGTAGTACTTTTTACATAACTGACTCAGGCGTTTCCTTCA
TTGAAATGCTCATCTATTGCCAAGTACATAGAATCCACAGTGCATAGGTT
TATGAGATGCTTGGAAGATGTACGATCGCCTGCACTATATTAGTATATTT
TTTCAGGCTTTACAAAACCAGAAAGAAATTACCGACTGTAATACTTAATT
TCCATGATTTTAATCGTATGGTCCGTGAGGAAAGAGGAATTTTAGGTAAA
AAAAAACCTTTGTCTATCAAAACATAAAAGAAAAGAAAAAAATTAAATTG
AATAAGTCAGCTTTTTAGCATGACCACAGTAATAATAGTAATACGATATC
AGCATGAGCTGCTAAACATTAAGAATTTTTGAATTGTGTTCGCTGGTAAG
AGAAAATAGGGTAGCATTAGTTGCGAGATGGAAAATTAAAATATGCGTCA
TAAGGTATTTTCGACGTTGAAGATTAGGGGTTGCAAGTCCGAGAACTAAA
CTGCCTTCACGACGTCAAACTTATTGTATGGTGACAATAAAACGAATTCA
AGAAGCCAGAGATGATGAGGAACCGATGACGAGGCACATGGGGATAGAAC
CTCCGTTATCTCCATTCCGCGTTGAGCAGCTCTCCTGCGTGCTTTCACAG
AGACCCTAAGCCAAGACCGCGGACGGCCCTCTTTTTCAAGGGGATCACCG
GTAAGGGGCCAAGCGGTGAAATTGCGTATTGTTTCCTCCTATCAATGATG
AGTACGTCGCCGATCCAGAAGGGTTATTATTGTCATTGCCAGTACTATTC
GTATGCTGAAAAAGTATAGTTCACTTCACCCTCTGGCTGCAGGCTAGCCT
AGCCGATAATGCCCCCGACTCCCTCAACAGGTAGAATTTGTAAGGATTCG
ACGTAGCCTGGACACATTGTGCATTTATCGTATCCCCTACTGCTACACGT
ATAAGAAGTCGTTGCTTTACCTCTATTCCAGAACTCAATCTTGTCGTTAC
TTGCCCTTATTAAAAAAATCCTTCTCTTGTCTCATGCCAATAAGATCAAT
CAGCTCAGCTTC
>269
TTGTCTTTTTTTAGCCAAAACTCACTCCTGGTAATGTCTATATGGCCGCT
ATGGTCCTGCTATCATGCTATTGTTGACAATGAAAGAGTGGCTGATCATG
TGTAATAGGCGAATAAGGTTGTTTTGAAGAGCTTTAATTAGCGCCTCTTA
TTGCCACTCATTAGGTCTTGAACAAGAAAAGAAACTCCATTTAGGGTATG
CGTCTGTTTCCAACAAAGCCCTATTGGACCCTGAGAATGTAAATCAGGGC
TCGTTTCTTCTCGTTTAATAACTAAACGAGACTCATTTCTTTTTCGTTCC
TTGGCGCTATTTTCGTGCATCCCGTAATTGCCGGTATTACGCGATCGTTT
GGCGTTACTATGGAAAAGCAGAATTATATATCCTCGAGGAAAAATTACCA
AACAGTGGTAATAACGTAGGAATGTAGTTCAGTTATGTAGATAGGCAGAT
ACGGATATTTACG
>270
TTTCAACGATCCCAAGTACTGACATAAACTTTAGTAGCCAATTTATAGCG
TGGGGTGCCTACTTCGTCACATTTGATATCGTACAGCGAAAAAACATTAG
TAACTTTATTTCCTTATTTCAGGGCCACTTTTCTCGAGAATAACGCTGCG
TGCTGAGCGGTTGTTCACACCGCGGAGTTGGAAACTTTATTCTCCGAAAT
ATTCTCCCCACTAAAATATCCTTACGTATTGTGAAACTTAGTTTTCTTTT
TGTATTAGGGTGTAATTTCTTATTTTCCCTGTATTTCACCGCATGCAAAT
TCTTACGATATTTACTCCGGTAAACGCAGTTAAGAGCTATTGTCCGGTCC
GACTGAATGAATATTCGGTTAGAAACGCATATTTGTGGGGAAATAACAAC
CTCAAAG
>271
TTTCTACATAATCTTGAAACTAGGTAGATCTACAATTGAAAAGTAAATAC
TAACATTATTTACTAAATTTAAGTTAGAAATCGGCACGAAAAAAATTTGA
CAGATTACGAGAGTCCAGCCAAAATATGAGTATATTACTATTTCCCCTTG
GTGAAAGAAATGAAAGATGTTATTTTTTACCGGCTTAGTAATACTGAGCT
ACTTACTTGGGGGAAAGAAAGATTGGCTACTTATTATGTATGAAGCCTCA
GATTACCTTGAATTCCTCAACCGTTTGAGCAGTATGCTCTTCAAATTCGA
ACTTTTTGAACATCTTTCCTCCACATTCCTGATTTTTTCACATTCAAAAC
GCGCTGTGAAGCTGTTAGAAATTTACAGATCGAGGCATATTTCTATATAT
AATGTATTTTTATTAAGACACCCAAAGT
>272
TATCTATTCGAGAAAAAAAAAAAAAGGCATCGAGTGAATTTTTCACCTTG
ATAAAAAAGCCCTTACTAACCCTACAATAAATTGTGCCGAAACCCTCTGG
AGTTTTCTAGAATATTCTAGCCCCATCAGGGCTAGAATATCCTAAAAGTT
TATAGTTGACGAAAATTTTTCAGCGATGAGATGCACATTTATAATGCTAT
GATGTTCAACGCAAAGGAAATCATAGCGTTATCGGGTAGGTTCGCATCGT
TAGCAATAGCTAGTCGCATATATACACAGAGATACATATTATACCTATAC
CGTTAAGAAATAGGATAGAAAATAATGAGCGAACAAAAGGAAGATTTGTT
TAAACCAGTAGGAGAAGCTGCTGCAG
>273
TTTCAACGTATTCTATAAGAAATTGCGGGAGTTTTTTTCATGTAGATGAT
ACTGACTGCACGCAAATATAGGCATGATTTATAGGCATGATTTGATGGCT
GTACCGATAGGAACGCTAAGAGTAACTTCAGAATCGTTATCCTGGCGGAA
AAAATTCATTTGTAAACTTTAAAAAAAAAAGCCAATATCCCCAAAATTAT
TAA
>274
CGAGGGAAAAAGACAACAAAAAAGCAATGGATAAACGGTCTCGAGAGATT
TTTCATGATGGAAAAGGAAGGAAAAAAACCCGAAAGGCATATGGATAACA
TTCTGAAAATGTCTATTCCTGTCAAAAGCATGTCAGAGGTCTCGAGGCCT
GGAAGTGCCGCATTAGGAAATACAGATGCAATGCGCGCGAGTTTACGAAA
TTCTCGCAGGAGTTTCTCCGGCCATGTGCGGCTGGTTCTACGTCTCGTGT
ATGGGTTTATTTCTGCGGTAATTATCGCCGGATCTCCGCTTCGAGACCGG
GTTTGTTTTCAAATTACCGGAAAAGGTCAGGCAAAACAGAGTGATGTATG
GGTGATCCCAGCAATGCCTGTTTATGTTTCTCCGTTTCAGGAAGCTTGTT
TTGTTTTTTCCCCGTCAGCGATGGTGACGTAAACGACTTTTTGCACTTTA
GCAAAGCTGAGTTAATCTCGGAAAATCTCTGTGTCCTTCCTTTTTCTTCT
AGCTTCCGTTCCGAGTCTCATCTTCTTTCCCGTGCCGTCGGGTTTAGTAA
AGAAATGTAAAGAAAAAATGTCGTATCGTACCCGAGAAATATTTCAATTC
TCTTACGTATGCGATAGCAGTTGGAAAGATCTGATTCGTTACGATGACTT
GATAAGCGCGGGCTTTTTCGCCCTATACGGCTTGGGCCTGACTAAAATGT
GATTCTGTGTTTTACGTATATGCGCGTATATAGAGCAATTGATTGACTTA
TTACGCAGTTTATCAAGATAAATTCTTTGTTCTTGCTTACGGGAGTGTGG
TAAGCATGTATACGCCCGTTTAAAAACCCGATGGAGGCTTTTTCCCCAAT
TCTCGTACTCCATTGGGCATATGATTTCTTTCTTTTTCCCTTTTTTTTTT
TTTCTATTTCCCTAAACTAACAGAACAAGCTTCAAAACAAATGACGGAGA
GAAAAACAGTTTTGATTTACCAAATGCGGCAAACTTATTGAGGCTAGACA
CAGCTCTACCGGATTCGTCCGAGCACTTTTTTGTTTTCTTTTCTATATTT
ACTACAAACATAACAAAGTTTTGTGCGTCTTCCCTAAAGCAGCTAGGATG
AAAATCCTATGCTCTCA
>275
TGTTTCTATGTTTTACGAATCTTCCATGACTCTTCTAATTGGTCTCTTTT
TACTACAAGGCTTCATGGCCCTTTTTCAAACCTAATTTATAAGTTCTTTG
CCCTATGCTTAAAACAGTTTAGCCCTATTTAATATAGTACAAAAAAGGAA
AAACCTAATTGAAAAAAGCTATTCACCCTAGGTCATTACTACTTTTTCCC
TTAGCTAGCCGTGTTTTTAGTTTTTGTTTTGTTTATTTTACCTGTATTA
>276
CTGCTAAAAAGGCTATCATGCATGACGTGTTAATCGTAAAAAATAGCGAA
CTACCTAGTGTGCTGGTTAATGAAATGGTCGGAACCAAAGTAACTTGGTT
TCTCGACGACGAAGCTGGCGCCTTGATTCCTGAAAACTGCTAATTACACT
CGTCTTTATACGAAACTGGCTCCGTTAATCACGACAGACAACCTTAATTA
CATTACATAATAATAAATAAATGACAACTGTCTTCTTTACAGCGTATGTT
GGAGCTTACTCCCGAAGCATAAACCCAGTTCTTCTAGAAGAATTGACAGC
AGAAAGGAAAGGGGTACCGAAGGCAAACTCAACCTTAAAAGTTCCGTAAG
CAACCGAGCCTCCGCGAAGGTTGCATAACTTAAAAGAAAAACATAGCTCA
CCCGGTGATACCGTTACAACGCGTTAATCTTAATGCTATGACTCGGAACC
ACCTGCAAAACAGCGCTAACGGAAATTTCCATGGAAATAGAATAAGGGAC
GCAGCAGGGTTTTTTTTTTTGGCGAGCACACGAAATATAAAATTGCTTCG
GGCCAGCTGCATGGAAGGGTTAATTTCGCCCCTTTATCGCAAGCTACGCA
GTTCTCCTGGCTCGAGAATGAATCTGGCCCGCCGCAGACGTTTCCTGGCC
CCAGATTAGGAAGCAGCGGCGGCGGAACGGAAGGTGCTCTAAGCAAAATA
AGGAATATTAGCCACGCCGGTAATTCCCCTCCTTTGGTCTGCCCCTGGTC
TGCCCCTTTCGTTTTTTATTTTTTTTTGGGTGAACGGAATACTCCGTGGG
CGGCACAAGGAGAGCCTGCGTAGGAATCTGTGCGTCTCAGTCGGGCGGGC
CGATTTAGCACCGATGGTTCGCTTTGGCTTGGGCTTACGGTGACTGCGAG
ATTTGCAGATTAGTGCATATCCGCGCCTTTGTATGACGTGAAGCGATCCG
CCCTGAACAACTTGTTACGTATATGATGTTGACTCTGCGCCCCCGTCTCT
CTGGTTGCTGCCTTCTGCGCTGATTTGGTGCAATCTTTCTTTTTTGTCTT
TGAAAGATTTAAGCTTTTTTTCGAGAAGAAAAAGGAGGAACCGAAAAAAT
AATCTTTCAGTTGTTGACCCGTAGAGCAGAAA
>277
AAACTACCTTTTGTGCGGACTTGGTGTCGCCCCATTATCTGCAGCCTACC
TATACTTAGTATCACTGTTCAATCACAAGCTAGCCCCAAAATGCACACGT
GACCAAAATGATTTAGAAAAGCAAAAGGATGAAAAATTACCCCAACATCA
CCCGGAAGTCAAAGATGGGGAAGCTGCATGCCCATTCTCAAAGATGAACA
ACGCCAAAACATTAAAACCTGAATCCGAAAGAAGCGTAAAATGTCACTCA
TACATGTCATTGCACATGAGCATTGTAACCGGTATAACAATTTTTACCTT
TGGTAAGTGTATCCTAGATGGATTCAAAGCATGAACGACGAAGCACGTGA
CACGTTCCCTTCAAACATCACAATTATTTAAGCGAGACTAATATATATGT
TTAGCGAAAAAAAAGGCCAAAAAAACTAGTAAATATACAAAGCAGAGTAT
TTTTGGCTCTTGTCCACATTGGATAAGAGAATATTTATTTTTCACACAGA
AAAAAAAGTTATATACGTATCTCTAAGAAAGTCAAAGACAAATTACGTAG
AATGTGATTCATTCCCATTTCGCCCGTACACTCTCTGTCTCTGTCTCTGT
CCCAAACTTCCCTTCCTATACGTATTCATAATCTGCTTAAACGTCAACAG
TAGTTTCGGAACATCTTCATACGTAGGGAATACGACTTTTTTCTTTTCAC
CTGCAGCTTGAGCCAAACTAAAACTGGGATCCGGATAAACTATTAATAAA
GGATCGCAAAGTCCATACGCCAGTTTAATGGGAATGAAATGATATTGCGA
AGTGACGTCAAGAATCGACTTTAAGCTATATCCGAAGTCAAGAAAGCCGA
ACCTTACATGCGGTCGGAAAGCAAACGAGGAGATTAGATTGGTTTTCATA
TCCGCTAAATTTTCTTTTGATTTTACTTTGGCTTAATCTAATGCATGTAT
ATCGGAAGAAGCAACCGATCTGGCCCAGTTGAGTCGTGCTACCTTAGTCA
TGCCCAGGAAAACCGGATTCCTTCTTTTCATTATGACATCCGTTTAGGTC
AATAGGCTTTTTTTTCTCTCGCCCGTGCCTCTCCGTGTTCGATGAATGTG
CAGCTTGCCTCCGAGCGGGCGAGCCACCTCGAGCGGGTGACGAAATAGTG
GAAAAGAAACGGGGAAGCAAAACTGTGCTGTTCTGGCCCGCAGCGGACGA
ACGTCATTAAAGGCGCTCCATTTCTGTCGTGAGGGTCTTTCGGTGCGGTG
GTGAGGCTGCGTAAACAAGCTTGCTCTTCATACCCCTCCCGTGGAGCTAG
TTCGGAAGGACTATTGGCGCATCTTCTGTTGAGAGGTTCCGTAATTCTCC
GTAACGTCCCGTTCACCACTTTGCATGTGCTCTCACGTACGGCCGTCTCT
TTTCGGCCTTCGGCCCGTTCCGATTTTTGTACCCCTTACGTGCTTTGAAT
TCTAGAAGGCATCTCCTCTCCGATGGCTTGGTACAGGGAGCACTAGGGAA
ATTGCACATGGAAGTATCTGGAATACAAAGTTTTTGAAAAGAAAAGCCGA
GCGTAATATTGGGACAATACCCAGTTCTCAGCCTTTTCAGCGCGGGTATG
AGACAGCTTGCAACAGGTAAAAGGAAGTTAGAAGGGTTAGGTGAAGGGAA
CGATGATGCTGCCTGAGAACAAAAATGCAGCTTCATGTTACATACAATAA
AGGAAGGA
>278
AAAGTCAAGACTTTTGTTATGTCAATATGTGCTACCAAAAATCAAGGGTA
TTTTCCCACCAGAGCTTATCAATGGCAACTGTGAGATATGAACAGCAGTT
AGTAAGGGTGTGTTCTCATCCGACCCTCTGATTCATTTGGTGGCCATTAC
ATTTTCCCTCAATGACACATTCCCCTATTTCATAACTGATTAAAATGGTA
ATGGCACGTGATAGTAGTGGCTCACAAAACAAAATTTTCTTTCTCAGCGC
TGACAAAGCTTCATTTGCATTCTAACCTTATCACAACAACTTCAACTTCA
CCCA
>279
ATATAAAAGGATGCAGATGGGGAGAGAGAATGTGGATTGGCGAGAAATAA
TGTCGGTATTCGAAGAAGGCAGAAATACTAAAGTGGCTACCAAGCTACCA
AACTACCTTAATGCAGAAGTTTTGACGTTGCTGTCCCTGCAACGTGAAAA
GTCCAAAAAGGCGCGTTTAGTTGAGGCCCAGCCAAATCTTTTCGCGGTGG
GCCGGCCAAATAGTTTAAGCAATTTACCCAAAAAAGAATAAAGAGAGGCG
TAAAGACGTTAGTT
>280
CGCGGCTTTCAGAATCTTCTTACCATCTGCAGGACATCACATGCAAGCAC
ATGAAGCTGGAACCACGCACCATTAAATGTAAACCTACAGACATAGCTAG
CACAGAAATGCTACTTTGGAAACCTCGGTTGCATCGGCTGACCTCGGCTG
TTCAGCAACGTGAGCTGGTTGTTGTTATTGTTCATAGAATCCTGTATTTT
ACCAGTGTAGCTTTGTCCGCCCACCCCACGCTTTTGGCCACTAGTATGTA
CGTATATGCGTGGGCTCTATATCATTGAAAACGAATTTTCCACGCAAAAC
CCACTTCACACCATAAAGGCCTTATGACGATGTACATTCTTCCCCTCCCC
CCTCCTCCCGAAGGAACCCTTATAGTGATCCTAATACGGTATAACGTAAA
CCGGAGTTGTCAGCAGAGAGAAGCGAATAATATGTTTTGCGTGGGGTTCC
CACGAGCGGCAGGAACCGTAGCGCATTGAAAAATGAATCATCGATCATCT
TTGGGTTTCAAGGGTTCGGACTTCGCCAAAGGTCCGAATACTTCCACCAG
TATTTCTCTTTTTCCCTTTCCAGTCTCGTTCTTCGCCGAATCCCCGCTTT
CCCATCATGATCGTTTCTCTGTTTCTCTCTTTCCGGAACAGGCTCTTTTC
TGACCGCCAGTTCGTGCGGTTAGTTCTGTGGATCTTGCAGGCACTTGCCG
GTTTAGCCACACTTCTCCGCTGTTTGTGTCGAATTTCCCTCGAGTATGAG
AAAGACTGGACCACAAAAGAGGG
>281
TCTTTCTTTTGATAGTTTCTTATTCTTAGAGGGAGAACCGTTCGACTAGC
ATGAAAAGAAAAGAGAGAGACTCTTTTATACGTGAAATCAAAAAGAAACC
AAACTTGAGGTACTCTACTAATGATTCTGGCCCTCCTTTCTTGTTTACTC
CGTGCCCCTAAAACTAATTAACCCATGCCCATATATTCATCCACACGACC
ATTAATATTGAACATAAAGATATCATTTCACCAAGCAGTACTTCACTCAA
TAACAAGGTGTGAAATCCGGTATATTATTCCATCGCTATGAGTGCGGGAT
CAGAAAGTGAATTACTTACTGTCCCCTAATGTGCACAGCCACGGGGAATG
CGGATCAACTGCAGAGAAAAGGGCGCACAGAGTTAGAATGCATCCCTTAA
TCCGGGAAGTAACAGTAACACGTCATGCGGATGTTTCTTCGGTGGGTATG
GGTCACAATTTCGTCCACCAGTACATCACAGCATGCTCTCATTTCTTTAC
TTTTTGCTAGCAGATGATTACTTTCATTTCGGGTGGGATGGGCCACCTTT
TTAGTTTATCCTCCGGGATGCCTTAAACAAGAAAATGGAACAGTGGGGAT
AAGACCCATAAAAAATCCGAAGTGATAAGTATTGATTGGTATATTCCCGT
ATCGGAGACCTTAACATAACATAGTGTAGTGATTTTGCGTATAGAAAAGT
AACCAATAAAATAAGGTAAATATTGCTATATGAATGTAATAAATAAAATA
ATATATGGGCGCAACAAAAAGAACGCAAGAAAGAAGCATTGATCAGTGCT
TTTTACTAGTTTTCAAGCTTTT
>282
GTTCAATTTTCTCTAAACAAATTAACAATGCAAAAAAGAGATCTTCTAGC
GAGCTTGAAAAAGAATCTAGCGAGTCAGAAGCTGTCAAGAAGGCTAAAAG
TTAATTTGTTTCCTCCTTATCTATCTTTTCTCTCATTTTTTTCTTGTGAA
GAAAAAAATTTGAATTTCATAGAGTGCGGTGCATATGTATATATCTATAT
ATGTTTGAAGTGTATATTAAAAATAAAGTCATTATTTGAATATTGGTTTC
TCGGTCTAAGAGCTTATACGTTTTAGACTGATCTGTTGTACTATCCGCTT
CAAATAAATAGATCATTGAAAGTGACGGGGATAACAGCATTTTACCTTTA
AAAGACGTTCTCATAATACATTTTAGGATTAATACATATAGCTTTTTTTT
TTTTTTTT
>283
TATTGATGTGATGCTAAAATACCAATTTACAGTATGAATAGCTTCTACTC
AGTTTGGTCTTAGAAATGGTCAAAAATGTTAGAAACGGAGTGACAAGAAA
AAATGAATAACAGATCAAAAGATTACGAATAATATAAAACGTAAAGAAAT
TGGTGGAATTCTACTATCCTCTTCATTTTAGACTATTTTTTAATATTTCC
CTTTAAGGAAAACAATATGTAACAAAAAAATTTCTGCTCTCCATTTAATT
GCATTTCTACAAGGAAGAATACGCAGAAGGACGCGCAGAGCCCTAAATTG
ATGTGCTTTTTAACATGCTGAGCCGAGTGCGTTTCGGTGAAATAACACGA
AGATGCGTTTCAAATTGAAACTAGTCAGTGTTATCTGCATGAAAAGGGAA
TATCGTTATGCATTCAGTTTTCCAATAGAGACATTTTTTTTTTTTTAGAT
TCGGCTTGCTTTATCCACCTATGATCTTGTTTTCAAACAACATGTGCCAT
GTAAGATAAAAAGGTAAAGATGAAGTACAGAAAAGAGTATAATGTTACTT
GTATATACAGGATATGAATCAATAATACTAATTATAACGTTGAGTCGAGT
AAAACAGCTTATGGATTTCTTTTCTTATTTTCGTCTTATCATTACTGCTT
TAATGCACATTTCTAAAACTTACCGGCTGCGTTAAATGATTGGCCCATTT
TCTGCATGT
>284
AGAGTTTTCTTCCCTTATGCTGGTGACCATCTTTAAGTTGTTTGTGTTGT
CCTTGTGAAACTGCTGTTTCCATTTTGCCGCGTGGAGACATCTGTCCAAT
TTGCCCCTGGCTCTCTGTAAATACCCATATATGAACGTTATATATATTGT
ATATTAATGGCGTATATGTGCCCATGGGAAGTCATAGTAATAGATCTAGG
CACGTGGCTGCAGTGACTCCGCGCAGGGCTGTACCGCCAAGGTAGATAAG
AGAGCGGAGCACGTGGGAAAAGAGAGATACGGTATGTTACAACAGTCAAA
GTAATGAACTTTCGCCCACGTGCGTACATCATTTACTATCTCAGGCCGCT
GCGTTTGGAACTTTACGGCGTTGTAGTTGTAATTGCCATAACTGCCATGC
ATTTATGTATATATATTTTCGTACGTAATGAACATGGTTATGTTATATAT
TGTTTGCAATCAGAGAGAAGTTGAAGAGGAGAAAAAAAAAAAGAGAGAGC
CGTACCGCAATAAAATGGACCCTTGTCGGTCACGTGAGCAAAAATACTAT
TGCCGCCGACGGCCGTAGATAATAACAAAGGAATAAAAAAAAAAAAGCGG
TAACTCGCGGAAGCATTGCCGATGCTTACCGAGATTTGCCGCGGATAACC
GAACCATCATTGGGGTAGGAAACATTATAAATATTTGATATATATAAAGG
AAAAAGCTTGATTTGGTCTTGTAATATCCCAGTGTAAACATAAAAATACA
CACATACCACAATTACACTCTCTCATCGACTCAATGACTGCTGGTTCTGC
CCCCCCTGTTGATTACACTTCCTTAAAGAAGAACTTCCAACCGTTTCTCT
CCAGAAGAGTAGAAAATAGATCTCTGAAAAGCTTTTGGGATGCTTCTGAT
ATCTCAGATGACGTCATTGAGCTAGCTGGTGGAATGCCAAACGAGAGATT
TTTTCCTATCGAATCTAT
>285
TCCGAGCGCATGCGAAGTAGTCCCTGCCATGCCGCTTCGGAAAAACTTTC
GAAACCAATACTCCTTACATCCGCCTTGAATTTAGGACCTACAATTGTTG
TCTCTTCTGCTTGAACCAATAAGCCCTAGAAACCTTACACCCTAATTTGC
ACAAGAAAACTACGAAAAAATTTTTTCCTCTTTTTTCCGCAGCTCCAATC
TCGCCCTGCTATTTTTTTGGTTCGGAGAAAAATAGTCGGTCGATATGAAT
TGAAGTTTCATTGTGGCCACTCGTTTAGGAATGGAATAACCTCCGCGAAT
GGAAAAAAAGAACTCGGAATATCAAAAATTCCGGCTCAAAGGAAAAATTT
GCTTCAGGAGGGGGGAATTATATTCCAGATGAGACCTGCAAGGATTTCTG
TGTGAGGTTTTCTCGGAGGAATAATAGTTTTCCAAAAATTACTTTTGGCA
ACTACGTGAATATAATTGACTACGGATATCCTTCGAGAAGGCCATAAAAA
GAACCGTGACAGGGCCAAACAGAAAAATAATGAAGACAAGTTTGCTTTTT
CTCTCACTGTATTTGAGGATCGGAAGCTTTTTGCACTGAAAATATTCTGG
GTTAACAAGGTTTAAAGAAGCAAACTGCCACAAAGTATATGAGAGTATAA
CCGGACGGTACCTATACTTTGAAGTTGGAATAAATACGGGGTAGACAAAA
AGGATGTGTTTCTGTATGTCTGATGAGAATGATGTCATCAAAGAACGTAA
ACAACAGTAACTGTCTATATTCTTGC
>286
AACTGCTAACAATAGTAAAGCTACGGCTATACTACTGCTTCATTTTATAT
ACTTGGCGAACAAGACGTATCTTCATGCAACACCGATGAATAGAGCACAT
CTTGCCTGTTATCTAAGGATAACCGTACCGTAGAAAGCGCAATGATGAGT
TACACCTTTCCCATAGGTACGCCTGCTTGTTTCTATGCTGCAACTGACTA
TTGGCCTGTCCACTCTCGAGCATTATTGTCTGTCGCATTTGCTATCATAA
AATATCCCGATAAGATAACACCCAAATGTGCGCCGCCTCATTTCATCATC
GGAAAAAAGGTGCGGCACCAATAGATAAACAGAATTGGAATGCCTAGTTT
GAGTCAGCCTTGCTGCATAAAACAAATACCTGTATGACTGCTTTTGCATC
TTTAAGAGAACCTTTGGTCTTGGCTAATCTCAAAATTAAAGTTCATATCT
ACCGTATGAAGCGCTGATAAAGAGCGCCAAATCTGCACCTTGTGCATTTT
GTTCACACATTCTTGGCGCTCCTAACTGGAGAAACGTCTATCATTGAGGA
TAACTCCGGATAGTCGCATTCTGATTGAATAGCCGTCTAGCTCCCTATTG
TGACTAGAATACTATTGACATCGTTTTCTCATCAAAACCTCCCGATAAAG
GGAAAAAAAGAATTATCTGACCAGATCATTCGGAAAAATGCGTATCGTCA
TTGATATCCTTCTTGTCTTGTCTGCTGCTAACACTATTTACTATGGAAAG
AGAGATTTCCCTGAAACTTCTTATTTTTATCTCTATAGAAGGGGAAAAGA
TAAAAGTAAAAATGTAAAAATGTTTACCTGCAAGTTCACACCTGTACATT
TTCTACATCCGTAAACATAAGAGAAAAAATGCCACAACTATTTTTATGAA
GATAAAGTTCGGGTAACGATAATGTTTTAATTTTGAAAAAAAAACTTCGA
CGCATTCGCGACTAGCCTCAGAGATTGAGTAATAGACCGTATTGAATTCA
AAATAAT
>287
CAGGTCTTCGCCGGAACACTATCATCAAAATCACTACAATTTAGCGGCTT
AGCACAATACGCGTTTTCAACTTCCTACGCTAGCGATGACAAAATGTCTC
CAAGAGGCGGAACTTGCGACGGATGCATGGAAATATCTTACGTAATGAAC
TTCCGTAATGAACTTCCGTAATTCAAGATCTCTTAGCATCTCTTGTTCAA
TCTTCAGACTCTACTAAGTGTTCTTACCAACCATTGGATGCTCATTACAA
ATGAATGAATATATTGCACGGAACGGAAGCGGCATGCTTTTTCCGTCTCG
TGTGCTTAGTAAAGCAAAACGGAGTAGAATCGGTAAGAACTTCCTTTTTG
GGTTGGAAAATCATTGCCATTGTTTGGACACCTTTCTTTTTCCGTATTGT
TCGAGCACCGCGTTTCTTTTTGGGTACTTGATGAGGTAGCAGATTCCTGG
AACGTGCTTTCTCTCGAGGTAACCTGCCTTGTTCCTCCTGGTGACTT
>288
GAGAGAATCATTTGTACACGTTTTTCCCTATTTTCTGCTCATAAACCGAG
GATCATCAGCGTTAAATGTAATTGCTAAGCCAAGAACTTTTGCTACTCTA
ACATTACATATTTGAAGGGTACAGTGAGATTCCCCAACAGGAATTCGCTT
CTGTACATCAGCCGGTATTCGCTGAGAACTACTGTAGCCCTTAACTGTTG
AATGATCTTTTTCTGGTAGATCATCGGCTTCTTTTGACGCAGGAAAAGGC
CCGTGTCACTTCGGCTTAGCTTCTTTCGGCGATTTTCAAGGGAAGCGTCT
GCACCTTAACGCAGACAAATGACGCATGATATGCACCCTTAAGGCGGACT
TGATCTTCAGATCCCTCAAATGGTAAATGTGCCATAAGGTGGCCAAATTC
CAACTAAAAATGATAAATAGGTAATGAATTGTTCACTATGCAGCGTTGCC
ACCGTTACGCCTCCCCCTTATTTTTCATTTCCGTTTCCATCCAGTTTTTC
AGCCTCCTTGAACCCTACCATTAGTAATGGAAGCAATAATCTCATAGCAG
CAATTGAAAAAAAAAAAGCATATTCGCTCACATTAAAATAATGAGATAAC
ATGAGATGGCTTGGAATTATAAGCGTTCGCTGACCTGAAAAAGGCGCGGG
GCTAATGGACCCATTCGTTAAAATGACCTTAAGCATCCACACATGCAGAA
TAAAAGAACTTAACCTATTC
>289
TAATTATGAGATTCTCTCATCCTATGTAGAATTTCACCCTTTCTCTGCCT
GCGTTTCACATACTGCCTTTTTTTTTTTTTTGGCAGTATTCTCAGCATAG
TCAGCGTTTCGCTGCCGAGAGCCCTTCTGTGGCTGGAACCCCACCAAAAC
ACGAACCCAAAAATACTTCTCCTGTATTCCCCTTGATCAACGCCTTTCTA
CATGAGGAGGCGCAGGTGAATGCAGAAAGGCACAATATAGCCAACACGTA
AAAATCACAATCATATCAGTCTATTCATTCATTTACGTATTTAATTATTT
AGTAATGGATATACGAACCGCATCGGCCACAGCCACAACAATATGTCGTT
ATTTCCA
>290
GTACTTGTATAGAAAAAACACATATTGTGCCGCTTAATATTTCGTTTCCC
TCATGTATATACCTTATCGCTGTTAAAATAAGAAATCTTCACTTCTGCTA
TCTTTTTTTTTCAAACATTGATTAATAATCCGGCCGTCCGCAGATTGCTT
ACGCAGAATATACCGTACCGCCACCGTAAAATTAACGAATACTTAAATTT
CCGCCTCTTCCGTTTCGGCAATAGCGAACCTTAATGTAAGTTTTTAAAAG
GCAGCGCCAAAAATTGCTCTGAAAGGCCTGCAGTGCTTCGCGGCTACGCA
GTTCCCATGTAAAAAAAAAAGAAAACTTTCTTTTTGAATCTGGAAAATCC
GCACAGGCGCGCCAGCATAAACCTCAGTATCCTGCAAAGGCCATCCTTTT
AAAGATCTTAACAACGT
>291
TTCCTCTTTCCCCAAGTTTTCCTGCAGGCGGGGGAATATGGGGCCCCATG
GAAAAAAAACCGGGGGGGGTGGGAAAAAAAAAGGGGTCAGAAAAAAAAAC
TGCTCAGGGAAATATCTTCTTCTCCACAGAAAGAGACGCAGGCCAGGAAA
AATGTGGAATATTATATAAACATTGTTTTTCCATTTTGTACGGATTTTTT
TGGAAGAAAGCGGATAAACCGAAAGAAAAAACGGGAAATGGTTCCGGTTT
GGGCATTGTTTTTCCTATTGGGCAAAAAAAAATCCCGGAACCAGCTGACT
CGGATATTTTTCTTCCTTGTTTCCGCTATGCTGCTGCAAGTGACTTTACG
AAGGCCAAGCGTTTCTTGGTGGAAATTACTGCAGTGTACTGGGTTTCGTT
GGAGGCCCAGCCTTCATCTGCGTCTTGTTTATTCATTCTCATCTGATTAT
TATATCTTGATCGGTGCAAAAAAATTTTGAGGTACTTAAAATTTATTTTG
CATAGAGATATTCGCATAAATGGAAAACCTAAGCTTTTCAGGTACGACTA
TTTGGCAACATCGTTGAACCTGGCTTTTCGGTCCTAACTTTGCACCATCT
AGGATGAGACTATCTTGACTGTTTTACTTTTACGCATCGCTAGAAAATAC
GTGCGCGTTGCCAAATCAAAATTCCCGCAAATTGATG
>292
AAAGCGTTAATCTTAATCCCTATATCTCCTCTAAAATGGACGTAGCTTTT
ACAAAGGGATATTACGCTTGAGTATCCCTTTTGAAGATCGTTGCACCATT
ACGTATTAAAGCATTTTTTTTCCTCCGTCAAGATCTTACCCGAATACTGC
TGCAGGACATACAAAGCGCACTGACATGACGCAGGAAGATTGATTAGAAC
CGTCCGCAAAATTTTCTTTGTTACAGCATTAGTAACGCATCACCTCCTTC
TCAAGCTAGGGCACTTTTAACTCATAAAGCGACACATTGCCTTTTCAAAT
ATTGTAGCTTTTCAAATCACGCAATGGAATATTTGCAGCATTCATTGTTC
CGTCAAAAGTAAAATTTATTTTTAGTACTTCAACGTGGAAGGCAAACCTT
GCCTTATACCTTTACATGGATGGTTTTATGCTATTGTGAAACGAAGTCAA
AAGGCTAAACAAAAAGATAAAGGAGGGGCATATTATCGGACCACCTCGTA
TAGCAAGAAAGGGTACTTATCAAAAGAAAAGGTCGCTGAAAATCGAGCCC
CTCTTGAGAATTTGATTTTCATACATATCCCTTTTCTCTTCCGGGTTAAA
GCCTTTACATAAATGTGTCATTGTATAGCATTACTTTTTTTTTGGTGTGA
AAAAAAAATCGGAAAAATAT
>293
AAGAAAGGTGAACACTGTTGCGGAATGCGTGGACTGCTTGTGTAAAAATG
CTAGTAATGAGGGAAGTGTGGACTTGATATGGCCTGTTGTGGAAGCCTGA
GAGTTCTTTCACGTGCTGTGTTCGGCCCGCCTATATAGGGACAAATTGTT
AAAAAGATAAATAAATATAATCTGCCTCGGAAGGGGTTGGGAACGCCCGG
CAGTAGCGATGAGGGTAACGGGACGATATTTAGAAGTGAATGCTGAAATA
AATGGTGTGAAGGCCTCTTGTATGTCGTCTCATATAGGGCTAAAACGAAG
CCATCGTGCACAATGGTAAGTTCATTCAGTGTTCCCATGCCAGTAAAACG
GATATTTGACACATTTCCGTTACAAACATATGCTGCGCAGACTGACAAGG
ACGAGGCCGTTGCATTAGAAATACAGCGGAGGTCCTACACATTCACAGAA
CGCGGTGGTGGAAGCTCTGAGTTGACTGTGGAGGGGACGTACAAGCTAGG
TGTTTACAACGTTTTTTTGGAGGCAAATACAGGGGCGGCATTGGCCACAG
ATCCATGGTGTCTGTTTGTTCAGCTTGCGCTGTGTCAAAAGAATGGTCTA
GTCTTACCCACGCACTCGCAGGAACAAACCCCATCGCATACCTGTAACCA
TGAAATGCTCGTTCTGTCCCGTCTTTCTAACCCCGATGAGGCCCTACCTA
TTCTAGTTGAGGGTTACAAGAAGAGAATTATAAGATCCACCGTGGCAATC
AGCGAAATTATGAGGTCTCGGATACTTGATGATGCTGAGCAGTTGATGTA
CTATACGTTGCTGGATACCGTGCTGTACGATTGTTGGATCACGCAAATAA
TTTTCTGTGCCTCAGATGCGCAATTCATGGAATTGTACTCTTGCCAGAAG
TTAAGTGGTTCGATAGTCACTCCATTGGACGTAGAAAACTCTTTATTACA
GAAGTTGTCCGCAAAGAGTTTGAAGATATCCCTAACAAAGCGGAACAAGT
TCCAGTTCCGCCATCGAGAAATCGTCAAGAGTATGCAAGGAGTTTATCAC
AACCATCACAACTCCGTTAATCAAGAGCAGGTCTTGAACGTTTTGTTCGA
GAATAGCAAGCAAGTTCTTTTAGGTTTAAAAGATATGTTGAAAAGCGACG
GGCAACCCACTTACTTACATCTGAAAATTGCAAGTTACATTCTTTGTATA
ACGAACGTTAAGGAACCCATAAAGCTAAAGACATTTGTTGAAAACGAATG
TAAAGAATTGGTCCAGTTTGCACAAGACACCCTGAAGAACTTCGTTCAGT
AATCACTTTCAAGCTGTAGTATGTAAACGATATAGATGAAGTTTTCGTGT
GTATAAATATATGAACTCTAGAGTGTTGCATAATTTGAAACACAGCATTT
CTTTTCGGAGAGCTCGTTTCAAAATGAAACAAACGCCGTTGTCCGTTTTC
GTCTCAATAGAAAAAGTGAAACAGATAAAAATTGTTTTAAAAGAAACGAA
TTTGCAACATCTTAAGATATATCAAAACTAATACAAAACAGCCTAAAAAA
GATTGAACAACTCTTCGCGGTCAGGTCTCGACACCATAAATCGAAGTACT
CGTACGCTAGTTTTCTCGCACATAGTACCACTACGTTCCTTTTACAATTA
GATTACTTCTTTTTAGTTGACTTTTTTGAGACGTTCGTGCCATTCATAAA
ATAGGAAAAGATAACAGGTAAGCACTGAAGACTTGTTTTATAAGTGTCCC
AAGCGAGACCTAGAGTGGATATTGATATTTCTCAAACAAGACTCGTCGAA
GAAAACACACTTTTATAGCGGAACCGCTTTCTTTATTTGAATTGTCTTGT
TCACCAAGGATGAAAGTCCAAATAACCAATAGTAGAACAGAGGAAATCTT
AAAAGTTCAAGCTAATAATGAAAACGATGAAGTCAGTAAAGCTACTCCGG
GCGAAGTTGAAGAATCGCTAAGGTTAATCGGCGATCTAAAATTCTTTTTA
GCCA
>294
GATTAAGATAACTTGCTACAACATATGAAAAGGCTTACTTTAGGCTTCAG
GCACCCTATAGAGGCCAACCACTTAATAAATTCTTGGCGTAGTGCAATCA
AGCAGTGAACAGAAACAAATCACATGTTTCCTTGGCAGAATGCTCATATA
AATGATGACGTAATTTTTACAAGAATGCCATATATTAACTTTTTAGGGCC
AAATTAAGATTGAGTTGAAATATTCATTTTTACACTACTAATCTTTTTGA
ATGCGCGCAGTTTTCTAAGTATCAAGCTCTCTGCAATCTTGTATGAAAGA
TGCAGCTAGGCACATAGGAAATGAGAAATCATAGTTATTTTTATTTTTAT
TTCTCTCCGTAAATATGCACTTCATACAAACAAGGAAAAAATATGATCAA
AGAAAGGCAAAAATAGTAAGTTCAGGCAATATAGAGAAAATAATTTATTT
CTACAAGTAGAGGGGCGCAGTAGAATGCATTTGTATAGCATAGCCAAGTC
AACAACAATACTGCGTTTTCTAAGGCATATTTTATTGCCATTTTTGCATC
TCTCTATTCATTTTACTAGTTGCTTGTGCAGAATAATCTATGTTGGCTGG
AAAAGTTTTTGGAAACATTTTTTTTTTTGCGGGCATAAAATAAAAACTCC
GCTGTTCATCGCTTCCTACGCAATGTTCTTAGCCAAGCAAAAAATTATAG
TTACAATGTTTGAGGTTTCTTCCGTTCTAGAGAAACTGCCGCAGAATATT
TTACTGTTTCACTACCCTCTTCCTTCCAAAATGGGAAATAATTTATTAAT
GTCGTTCTTAACACAAAGATCGATCGATGAAAAGGAAATTGATGCATTAT
TACATCCTAATGCGGTCTATCGTTTCTGCAATATGAGAACCACATTCAGA
ACATTATCCTCATATGGCAAATAAACGAGATATCAAGATACCGGACCCCC
TTTTTTACAGTAGATAAACCGGAGAATACCAGAGTATTTTCCAAATATAG
AAAGAAAAGGGTTATTTCTAATTCTCGCTCTCTGTTTTTGGAAGACGAAG
TTATTAAGTTTTTGCCTGCATTTGGAAACCTGCTGCGATTTCCTCGATAT
TGAAAAAAAGTAAAGGCCACAAGAAAAAAATTTTATAGTTGCCTTGGGAT
GACAAACAGCTGGATATTATTATTATTGGCAGTAGCCCTAGTATGTTGTA
AAAGAGTTATTTACAAGATTTTCTTTTTACGAGGGCACGTTATAACGTTG
GACTCAAGGGGAAAGTTTCTAAAGGCACAAATAAACATTATGGGCTTATG
GAAAAGGTGCCAGTGACGTGATGGTTACGCCTCGCCATTCATGTTAAACG
ATGTAAATTACTTCTATTACAGGATATTTTCTTGCCTTCGTTTAGCGTAT
TATCAGCCCTTTTCTCTGTTTTACAAATAAGG
>7
GCGATCGATTATATATCAAAAGCTGTCCGCTTTGCCACCCATAATCGGCG
CTTAGTTTCGGAGTTCAATCATAATTCTACCACCTTACACTCAACTTACT
CTTTAACTCCTATAGTATAATATCGCCACTGACCCCATATTAAAAAAATT
TTTTTGCTCGATCTTCTATCCTCTTTAGGTTAATTGTCGCTGTTATTGTC
TAGATTTTTTCTCGGAGATGGCGCATCTATTTGCCGTCAAAAGATCCTCT
CATACCATATTAAGTAAATTGCCTCCATTTCTTTTTCCTCGGGCAGAGAA
ACTCGCAGGCAACTTGCTCTCGAAGTGGTCACGTGCGGGTCTAGGCCTGC
ATAATCGGCCTCACAGAGGGATCCCGTTACCCATCTATGCTGAAGATTTA
TCATACTATTCCTCCGCTCGTTTCTTTTTTCAGTGAGGTGTGTCGTGAAA
GAAAACCCACAATTAAACTTTCAACAACCGGGCGACTAGGAAGAGAGTAG
TGGGCGCGGATGACGAAGGCTAAGGTCACTTCTTCGTTTCCTTTATTGGG
GTTTCCGTGTAGCCTTCCCCTGAATAGTGTGGGACGTTTTATGAGAAGCC
GTAAGAAATAGGCAAATTGAGTTATGACAAGTAGACATGATGCCGCAGCC
TTGCCTGACTTTACGTCTCCTTCATGAATAAGTTTTTCTATCGAGTTCTT
TTCCTTTTTTCGCCTTAATTAGCTCAATTAAGCCTGTCCTCACTACTTTT
CTTTTTCTTATCGGCTTTGTGCCACACCTAACCTTCGAATGCTGTTTTA
>8
TTACTTTTCCCCAGCACTACGCAATCAAAAATAGTAAGACCTGTTCAGTA
GTAATCCTTTTTTATTGGACTAACTGCGCAAGATGATGTGCAGGATAGTT
AACACACGCATACATACAAAAAAGAGCCTCTTGGACAACCTTTACTTAAT
ACACAGGGGCACGCCAATGTTCAACTGTGTTGTTGATTTCTTATCCAGCA
TTCTTTTACTTCTCTGCATTTTTTTCGCGTCGCGTCGCAAATTGTGATGG
TTAAAAGAAAAATGAAAAAATATTTTTCGCGTCGTTATCACCCGGAGGAA
TAAAAAAAAGAAACATACACATCACGTGACCACAAGAATGTTAGAAAGGC
TTACCAGTACTAGAGACGTTAATAAATTGCGAATAGCCCCCTATCTCCCA
CATGTTGGCATCTGTGAGGTGGAACCTATTTAAAGGTGCCACATTTCTTT
CCTTAGAGGACGATGGTTGCAAGATCAGCACAAATCCATAGTTTGATGCA
TGGAAAGCGAAGCACTCTAACAGAAGTAAGATAATAAACAATCTCACGAT
TCTACTGATTTAAGTGCAACTAGCTCTTGGGCTTCTTTTGGTTGCCAAGT
CGGAATAGACGACAGATGCATGTTTCGGTGCAGAGTTCAGAGAGATAAG
>9
CACTTGCAGGTAAGAGCAAAAGGCGATTGATTTCCAGTCCGCCTCTTGTC
ACGTGATTTAGTAAGAAATTTTGACAGCACCCTCGGTTTAATGGAAAAGA
GGGGCGTTTTTCGATGAACCCGAGGGGAGACTAGAGAATCATCTCGGTTG
AATGGAGCATTATTTTTTTAGTAGCGCCCGCCCGGAGAAATGGACGTTGG
CGAATGAGCCATGAATTATTAACCGCCCATGTCTACCAGATACCACATCG
TATGACAGTACCAGCCTAGTCCCGGTAAACCGCAAACGGACCTTAATTGT
GACGAAGGGCCCAAATTTGATGGGTCGGTGTTAATGATTAGTCCTCATTG
TCATAATAAAGTGTGATGATGGAGGCAATGATGATATACGGTAGTACTAC
TGCTCGAGGTGCTATCTTTTAACCAATCCTTTGAGATTCTTGTCGCCACG
GAGTTACTACCTTTTACAAACCGTAATGTCACATTTTGCATATATCTTAT
GTATAAATATATAGTTCA
>10
GAATTTCGTCATATTGGGTTCGCAATTTTTGGCGATGGCTTTGCTTCGAT
ATTTTTCGGATGAAAATAGTCAAAGGACACTAGAAACACGAATGGCGCGC
TGATTACGGAGACGTCGGGCTAAGACAAAGAGGGTCCATTCGGCGTGCTG
GTGGTACTGTGACAGATAAACCCAATGCCCCACTTTTCTCGAGGAGTTGA
AACAAGCGGGACAACTGCTACGTCATAAAAATGGGAGTACCAAGGGAGGA
GCCATAAGCCGGGTAAAATTTGGCGCTGTTTTTCTTAATCTAAAAATAGT
TCAACAATAAAATTTGGGCTCCGCCCATCCAGACCAAAGCAATCTTCGGC
CTTAACAAGCCAAAGGGAACGAAACCCAGACTCTACCATGCATTTCGAAC
ATGTTGTAGCTAACTACACTGGTAACCCAGATACCTATTCTCTCAGTAGC
TGTTTCACCAAGACTCCGCACTCATGGTAAGTAGAAAAAGAAAACTCTCA
CAAAAATCTGAGTGGCACAGCTTTTCCAAATACGCTTTTTAAACTTGGAG
AAATAAAGATGTATTACCCGCTGGTGCCTTAAAATATCCTTTTCTCCGGT
TGTCCAATAATTTATGTTACGGCGGCTATTTGAGTTTTTGTGGAAATCTC
TATCATTAATAAATGTCAGCCTTGTGTCTTAAATGCAATTCAACAG
>11
GGCAAGGAACAAGATCAAAAACGTCCGACCCCAATTTAGTAGTAAATTAC
AGTAAGAGAAAAAGGTATTGGGGCTGATACATATTAATTGTGCGTTGTTG
TTGTTGTTTAATTTTAGATTGGCTATTATGAGTACACACAAAACGTTGTA
AACGCAATCACCCATGGATAAGCGCTCCCTTTAAAATGCACTACGAAATC
ATTGATCTACTAACTTTAAACCGGACTTAAACCATCAAAGGGTGCTCTAG
ATCTCATCGATGTATTCTGATGCAGCCAAAATTGCGCAATCAATCACGTT
TCCCGATATAGAAAACTAATTGGCTGTGTTACGTGGCTGGGGGTTCTGTA
ATTCCTTTCTTCCCCGGTGAATCATCAAGATTGGGCTAAGCGCCTTTGAT
CCTTTCCCTCGAAGACGGAAATGGGGCCGCAGGATAAAAAATGGTGTGTC
TGTAATTCCGATTTTTTGCTTATGTAATCATGTAACTTTCTTCTAGTCCC
TTTGCAGACATGCATGACACTTCCTTACCCGAATAGTGAGTTAGATCTGT
GTTAGGATGCAGGATGGGCAGTTCAAAGGCTTTTCTTATCGTATCTTTAC
CTTTTCCTGTAACTAAGAAGGTTTTTGAGTGCATGTAAAGGCACATAAAT
GAAACTTTAATTCCCTGCGTATTTAAGACCCAAGAAGCCACCATGACGCT
TCCTTGATGTTGTATCTACCCCCAATCCTGGCGCCCCCTCCTGCGGGCAC
GCATGCGCCTTTGATCCTTCCCCTCGAAGACGAAAAGTAAACAAAGATAC
GCACTTTTTTTCTCCAACGCAGTATTGAAGGTACCATCACATGCTTACTC
ACTTTGCGGCTGCTATAACACCGTGGCAGTGTAACGTTTTACCGTTTGTC
CTTTGCTACCGCATTTTAAAGTGGTACAAGATGTTGAGAGAAAAGATTTC
CTGCAGCCATGATTAGGAGAGGTAATAGCGGATGACATCAACGAATAAGC
TTTATCCAGCGGCTTGTATAGTTCTGTGTACACAATTACTGCCGGGCTCT
CTGAGCATTTGCGTTTCTCGGGCTAGCTTCATTACTTAGTAACTTCAAAT
TAATGAAATATTTAATTATCATGATTCCAAACAAAACTACTTTAATTTCA
ATCACATTTTTGTTATCTGCCTGAAACGATAGCTGTACGGGTACGTTCTT
GATAAATAAAACTCAGTGTTTAAAACTCTCTTTTTACATCTGTTCGCCGA
TGATTGCTTGCTCGGAGGTACTAGTCATCGGAATTGAGGAAATTCCTTTT
CTCCTTTGTTTTCTCTTTATCCCCGCGTAAATACGCGGAATGCCAATAAT
CAAGTACACATTCTTTCTCCAAGTTGGCCAAAAAATAGTTCAAATTCTTT
AAACTAAGCGCTATTAATTATTATTAATTATATAAGTTTGAAAATATCAA
TGCAGGACCCTATTTCTTCACGAGGGTGTATCCAGAAACGGTTTCTTATA
TAGTGTTGGCGCTCACTTTTTTCCTACCCACGTCTATATATGCAACGCCT
ACTTGTTTTAATCAACATCACAATTTTATGCTTTTGAGGTACAGCAGTTA
GCCGTACGTTTTCGGCAGTCGCTAAAAATGTAAGCGCGGCATTTACTGCC
ATTTAGTGGACTTCTTGAGGTTCTTTTGACATCCGCATTCTTGCAGCAAA
TACACCCCCACCCTTCTTTTATTGAGAATATCTACTGAACCTCCGTGAGG
GAATACATTAATCAAATTACTCCAACACCATACGGGCCGTGGCGGAAAGA
ACAGCATGATATAGATAATATATGATATGAATTGATTTTTTTTTCTTTTT
TTCTTGCGGCTGGTATGGTATTGTAAGGATGATAGTGCATTCTATGAGTG
ATTTTTGTGACGGTGACGTACGATCTCTATACCTTTTTAGCCGCCCATCT
TCTGCCTTTCATTTTTATGCCAACCCTCCATCCATACATCCTTTTTAACC
CATACATATCATTTAGATTATTGTTTTTTAATTTTTTTTTTAT
>12
GTTTTTACAACTATCGAATAGTGTGAACCGATAACTGTGTAGTTGTATAT
TAATAGAACTTTACTTTTGCGCAGGAACAAACATTTTATTGCGACATAGG
CATACCTTGCCCTCAGAGATCTTTATATTCTTGTTCCTCGTGGCCCAATG
GTCACGGCGTCTGGCTACGAACCAGGAGATTCCAGGTTCGAGTCCTGGCG
GGGAAGAATATTCTTTTTGTCACTAACACAACCATTCTATAAATTGAAGA
GAAAAATTAAATGGCCAATATTCTACGTGCTTGTTATTAGAAACTCGCAA
CAATTGTTCTGCAAGGCCCCTCATTTTTTTTTGCTATATAAAATAATAAA
TGGTCACGTTGGCATAAGTTTGTGTAGAAATGCTTAAGATCACTTGCAAA
AATATAAACTGAAT
>13
TTGATGGAAATGGAGCTTAAGTGTGAACCCAATGTATTTTATTTCAAGAT
AAGACCATTTTTGGCCGGGTGGACGAATATGTCGCATATGGGGTTACCAC
AGGGTGTTAGGTATGGAGCGGAAGGACAGTATCGGATCTTTTCTGGCGGG
TCCAATGCGCAAAGCTCGTTGATACAGACACTGGACATCCTTTTGGGTGT
GAAACACACTGCGAATGCTGCGCATTCTTCCCAAGGAGACAGCAAGATCA
ATTATCTGGACGAAATGAAAAAATACATGCCAAGAGAACATCGTGAATTT
CTTTACCATTTGGAATCGGTATGTAATATTCGCGAATACGTTTCTCGTAA
C
>14
TCGGTTTACTAATCCGTAAAGCCGACGCGGGTAAGCCAAGACCCTGAGTT
TAGAACTAATATTTCGTCACGTCACGTAAGTGCAAGGTAATAAAAGCAGC
AGAAATATCTGTAGTTTCAACAAAATATGTCTGGCTTGCGATTTGTTGTG
TTTTGAAACTAGTTGCTAGTCTGCATTCCTTTGTTTTCCCTGAATTACCC
AAAGAAGAAAGCGACGCGAGGCCTCACGCGTCGGAGTTTCCAGATCAGGA
AATTACCCACTTAGGAAATTGAGTTGGCTGGCAGAAAAGATATAACGCCA
TCTTGAAAAATAGTATTAGTTAGTCTATTTTTTCATTTATATAGTA
>15
TGCTGCAATTATCTAGCTGGCTGCTAGTAGCAATGTGCTCTTCGTTACGC
TACCGTAGCTTTTCTCCGTGAGTGACTGATTTTGCTGCTGTACATTTAAC
TCCTTTTCTATTTAAATTGTGCGCTGCCATTTTCCGCATCGGAAAACCTA
AGACAAATTTTGATGAGTATACTTGGTACGTGCCCACGCAGCCAATAGTG
TCTCGTTCACGGCATCAGATACAGCAGTACTTAAAAGGGCACTGAGGATC
AGGTTTCCTAATCTGGAAAATTTTGCAGCACAAAGCTTAGTTATTTATCT
CCGATTATGGATTTCTGCAGTACCTAGGTTTCAACGTAAAACTGTAACAG
AACCTTTCGTCATGCAAGCATAATTGAGTTGAGTGCCTTGTTTCCAATTT
CAGTTTCCAATTTTACTTCAAAAATCACTTCTGAAATAAGATTTAAGACT
TGTCAACCCTG
>16
TATTAAAGGTTATTTGGGTCTTTCTCTCTCTCGGCTTTATTTTATTTATA
GTTTCTATCTTTCAGCTTTCAAAAAATAATATATATGGCGCTTCATGAAA
AGAGAGCTAGCTACAGAAATATAAACAGTCATGGATGAATAGGCGGCGGC
AGCTATGCCGGTGCATGCGCACAGTATAATGGACTTAAACTGCCTTAGTA
CAACTGTTCAAGTTATTGAATAGCATTATATATTAGTGCCAACCAAAATA
TGAAACCGATGCTTCCAACTGTCACCCCAAGAAGACACGCAAAAGGTGCT
ACTGCACATAAATCGGCCACTCCTTGAGCTAGACCCAATT
>17
GGAAAAAGTCCCTCTTCTAGGGTTGACGCGCTAGAGGTAAATCCATTAAG
GTTCCTCCTGGCTTCGTTAACTCCGAAAAGAATAGCATGTGCAAGATGAG
TTACCGAAAGAAGCAATAAAGAAAGCACGAGTACATGTAGAACAGGGGCA
CAGATAATACCAGACAGATGAGCCCACTTTTAAGAGTTTCAAAACTTCCA
CGAATGCACAGGGAGAATAAAGTACGCGCTGGGTCCGTTACGATTCGTGC
TGCAAGAGGTTTAAAATCGCTCCACAATGGTCTCGCCCCTCGGCCCTTCT
CCAATTACAAGCATATTACTAATACAGTTTTCGTTTCTTTTGTAATGTTC
AGATAGGAGCGAAAGACTAATTTCGATGGAAATTTTTA
>18
TCCAACAAACAGTAGCTCGCGTGGCGTAATGGCAACGCGTCTGACTTCTA
ATCAGAAGATTATGGGTTCGACCCCCATCGTGAGTGCTTTGTTTCTTCCG
TGATAGTTTAATGGTCAGAATGGGCGCTTGTCGCGTGCCAGATCGGGGTT
CAATTCCCCGTCGCGGAGATTTTTTTTGAAGCTGTTGTAGTTACTACTTT
AAGATCCAGATTGATACAGTACGTATGTGAGGCAACAGATACTTGCAATA
TAACAAGTTTTGTGAAGAGATAGTGTGAATACCTATGGTTCCACGCAAGA
AATCATCTATTTGAATTTTCGGCTTCTATAAGAATGACAAAACTCATAGG
AAGCTGCAATGCATTAATTTTCCGTAAGCTTTATTAACCCGTTAGCCGCT
CAAGTCGCTTTTCTCAGGTCGCGCTCCTCTTCTCCGGACTTATGTG
>19
TTAAAGGCATCGCACGGTATTGTATTTTCAAGATGTCCGCACCGAATCGG
TATTGTAAAAGTTTCACAATATTGAACATCTAGCACAATGATCAACTGAA
TTGAGGACAAACAGATAATTTTCGTGTGATATTATATTTTAATAGGATAA
AGGTGAACTACTACAAACTATTTCAAAAAATAACTATTTAGCTAATCACA
TAAAAAATACTCCGATACGGGGAGTCGAACCCCGGTCTCCACGGTGAAAG
CGTGATGTGATAGCCGTTACACTATATCGGATTATAAACGGTTAATATTC
AACACCTAATAGTACTACTTACCAAATTAACAAGAGGATCATCTTTCCCA
TATGATAATAGACACCGGCTCTAAACTCAACTGTTCTGTACTAGTTGTTT
TGATAGAATTTTTTTTACAAATCTGCCCAAAGTACGTTTTCCTAGTTTCA
TGCCTGTGCAACGCCGCAGCGCTAACCTGTGCAGGACAGATATGTAAATT
GGAATCTTAACAGCAA
>20
TTCCTCTGATAGCAGTGAATTTTCGAGGGTCACGTCGTGACTCATATGCT
TTCTTGTTCCGTTTCGTTTCGAGATGACAAAAAACTGGTCATTTTTTCCG
TTAAGTGCAACTCACAGCAGTATCGGCCGCTGAGAAATGCCCGGACAAAT
TTTTTTGAGCCGGATTGGTCACCGTTTCTTTCTTCGGCGCGGCTTCCCAT
TCCCGTCCATCCAAAAAAATCTACCTATATAAATCGACTTTTCACCTCTA
AAGGCAGTTTATTCCTTGTATGTCCTTTAAGTACAGTTAATAACGAGC
>21
ATGCAAAGTTTATTTCCCCGTTTTCTTTTCTCCGTCTAGGCATTTACGCT
TTCACGCAACTTTATTATATCACCTCCGCGGGGATTCAACAACGAGGTAT
GTGGAGAAGGAGAGAAATTCCAGAGAAAGCAGCCTAGAGCATCCTGCTGC
AGCAACTTATAAACGTATCTCACAGAAAAGGCCGGAGAAAGTTCTTGAAA
TGTGTAATTTAGCCTACCTGCCAAGCGGCTGGAATTATCCCGAGAATAAT
TCCGCGACCGGGCCTGTTCCTGAACTCTAAGAAGTTTTGGAATTTCCGAA
CGCTTCTTCGCATGAAAGACATGAACTCTTAAGTAAAATAATATGAACTG
GCATGGTCGTAATCTTT
>22
TTTCCTTTATCATCACTATATCTGAAAGTTCAAGGTTATTTTAGCACTTC
TACATTCTCGGGTGTGGCTAGAATTGGGCGGAATGAAAAAAAAAAACTAT
GTCCATCGCTTTACTAATTAGTGATCGCACCAAGAAAAACGAGCTGTACA
TTGCAATTGTACCTCTTTTTTTTTTCCTACTTAGAATCCCAATCGTAATT
AATTCACT
>23
TACTCGCGATGACTCAAGAGCGTGAAAAAAAAAAAAAAAAAAAAATTAAT
TGCTAAAAAATCAAATATATGCTTCCAATCGGATTTGAACCGATGATCTC
CACATTACTAGTGTGGCGCCTTACCAACTTGGCCATAGAAGCTTCTATTT
TATATTTGCCTGACCTATTTTAACGGTTATATTCCACAAACATTTTAATC
ATGAAGCAATTTTTTTGATGTT
>24
AACAACAGGCAAGGAACAAGATCAAAAACGTCCGACCCCAATTTAGTAGT
AAATTACAGTAAGAGAAAAAGGTATTGGGGCTGATACATATTAATTGTGC
GTTGTTGTTGTTGTTTAATTTTAGATTGGCTATTATGAGTACACACAAAA
CGTTGTAAACGCAATCACCCATGGATAAGCGCTCCCTTTAAAATGCACTA
CGAAATCATTGATCTACTAACTTTAAACCGGACTTAAACCATCAAAGGGT
GCTCTAGATCTCATCGATGTATTCTGATGCAGCCAAAATTGCGCAATCAA
TCACGTTTCCCGATATAGAAAACTAATTGGCTGTGTTACGTGGCTGGGGG
TTCTGTAATTCCTTTCTTCCCCGGTGAATCATCAAGATTGGGCTAAGCGC
CTTTGATCCTTTCCCTCGAAGACGGAAATGGGGCCGCAGGATAAAAAATG
GTGTGTCTGTAATTCCGATTTTTTGCTTATGTAATCATGTAACTTTCTTC
TAGTCCCTTTGCAGACATGCATGACACTTCCTTACCCGAATAGTGAGTTA
GATCTGTGTTAGGATGCAGGATGGGCAGTTCAAAGGCTTTTCTTATCGTA
TCTTTACCTTTTCCTGTAACTAAGAAGGTTTTTGAGTGCATGTAAAGGCA
CATAAATGAAACTTTAATTCCCTGCGTATTTAAGACCCAAGAAGCCACCA
TGACGCTTCCTTGATGTTGTATCTACCCCCAATCCTGGCGCCCCCTCCTG
CGGGCACGCATGCGCCTTTGATCCTTCCCCTCGAAGACGAAAAGTAAACA
AAGATACGCACTTTTTTTCTCCAACGCAGTATTGAAGGTACCATCACATG
CTTACTCACTTTGCGGCTGCTATAACACCGTGGCAGTGTAACGTTTTACC
GTTTGTCCTTTGCTACCGCATTTTAAAGTGGTACAAGATGTTGAGAGAAA
AGATTTCCTGCAGCCATGATTAGGAGAGGTAATAGCGGATGACATCAACG
AATAAGCTTTATCCAGCGGCTTGTATAGTTCTGTGTACACAATTACTGCC
GGGCTCTCTGAGCATTTGCGTTTCTCGGGCTAGCTTCATTACTTAGTAAC
TTCAAATTAATGAAATATTTAATTATCATGATTCCAAACAAAACTACTTT
AATTTCAATCACATTTTTGTTATCTGCCTGAAACGATAGCTGTACGGGTA
CGTTCTTGATAAATAAAACTCAGTGTTTAAAACTCTCTTTTTACATCTGT
TCGCCGATGATTGCTTGCTCGGAGGTACTAGTCATCGGAATTGAGGAAAT
TCCTTTTCTCCTTTGTTTTCTCTTTATCCCCGCGTAAATACGCGGAATGC
CAATAATCAAGTACACATTCTTTCTCCAAGTTGGCCAAAAAATAGTTCAA
ATTCTTTAAACTAAGCGCTATTAATTATTATTAATTATATAAGTTTGAAA
ATATCAATGCAGGACCCTATTTCTTCACGAGGGTGTATCCAGAAACGGTT
TCTTATATAGTGTTGGCGCTCACTTTTTTCCTACCCACGTCTATATATGC
AACGCCTACTTGTTTTAATCAACATCACAATTTTATGCTTTTGAGGTACA
GCAGTTAGCCGTACGTTTTCGGCAGTCGCTAAAAATGTAAGCGCGGCATT
TACTGCCATTTAGTGGACTTCTTGAGGTTCTTTTGACATCCGCATTCTTG
CAGCAAATACACCCCCACCCTTCTTTTATTGAGAATATCTACTGAACCTC
CGTGAGGGAATACATTAATCAAATTACTCCAACACCATACGGGCCGTGGC
GGAAAGAACAGCATGATATAGATAATATATGATATGAATTGATTTTTTTT
TCTTTTTTTCTTGCGGCTGGTATGGTATTGTAAGGATGATAGTGCATTCT
ATGAGTGATTTTTGTGACGGTGACGTACGATCTCTATACCTTTTTAGCCG
CCCATCTTCTGCCTTTCATTTTTATGCCAACCCTCCATCCATACATCCTT
TTTAACCCATACATATCATTTAGATTATTGTTTTTTAATTTTTTTTTTAT

>25
AGATTTTTTAGGAATGGGCAGAATACCTTGACCAGCGGGCTTAGCGAAAT
TAGATTGATTACCGTTCACAAACATACTTGGCTCCGGCACTAATAAAAAA
TCTTTATCTGCCCTATCTATTCTAGTATCGCCAATGTCTTTTAGCTTCTT
CGCCCTAAAGTTTCTTTTTGGTGCAAGAGTCTTCGAGAAAAACGTGTGTT
GAGAGAGGCAATGTTTAACGAAGAAAAAAAACTCTATGGAAATCCAAGAA
GTCCTTGTTTCTTTGTTTTCGTTTCTAATATATGCAGGGTCAAGCGGGAA
AAAGAAAGACAGACGGAAAAGTGCCCAGCAACACGGAACAAAATTGTCCA
GATTTATTCGAGCGGCCGCGGTTAGTATGCATAATGCAGGCGCCCCTCGT
CCAAATGCGAACGGTTCCATCCGAAACAGGCCATTTCCCAAAAATTATTT
CTCTTAATAGAAGTTGCTCGCGTAGTTACCTATTGTCGATGCCGCATACG
CAGTTACCTTATCCGTTGCCCTACGGAGAATTTCCGCGATGCAGCACCGT
GCGGCGAGATCACAATTTTCCTTGTACACTCTACTCTGCCCCTGGAGTGG
TTCACCCCCGTCTGTGCGTATTTTCGTGTATGATGATATAAGGTCGTTAC
TACCGTTGATTCAAAAACAGTTGCTTCTTCCATATATTGTAGCACGAACA
ACTATGGCCGGCCGCAAATTGCGACAATTACACCTAACGCAGCATTAAGG
TCGCAGGAAATGTTATCTGCCGAGCTGTTTATCTCTGTTTTCCAAGATTT
TTTCAACCAGCCCATGAGTCTGCTGTTGGCGGCAACCCAGTTACAGATAA
TGGTGCATGTGATAAGCTTCGTACCACTATTCGTAGTTTGTTACATCTTG
TAAGCCAGTATATATATTTGTTAGATT
>26
GAGAGTTAAAAATAGATAGCTAAATGTATTTCGAGTCTCCCTATGTATCT
GCGTCTCTGCCCCATAGCACCTCTGTTAAGTTTTTATCAATATTCCATCG
GCATATTTGAAACCGCCCGGATGGTATTAGAGAATCACTCAGCCTCAAAC
TCAGCAAGTAAAAGAGGACGGGACGGACTTTCAAATATGTCTTTGTACGT
TATTGTTTTTCATCCCTAAATGGCTTAGTAAAAAAGTTTTGCCAAGAATT
TTTTGACGTTCAATGGAAAAATCGCCAAGAGAAATACGCACAACCTCCGT
TTTCCCGCCTTTTATCAAAAAATCTTAGTTTTCCCTTCCTTTTTTTTTTT
TTGGGTCGCAGAAAAGAAAAAAGATAGTAGTG
>27
TTTTCCATTTAAGTTGATTTTCTTATTATTGTCGTTGAGAACAAAAAGAA
ATTGGACGAGTCCGGAATCGAACCGGAGACCTCTCCCATGCTAAGGGAGC
GCGCTACCGACTACGCCACACGCCCTAATATTATTGATATTGTTGTTTAT
CAAAGTGAGATACGTCAGTATGACAATACGTCATCCTAAAAGTTCATAAA
ACACATATGAAACAACTTCATAAC
>28
GGATGATAATTTTTCAATGATGATTCCAGGGTTACTTTAACGTTACACAA
AAGAAATTAATTAGTGCGGCTGTTTCTGTGAGCGGGGCAGTAAGTCCGAA
GCCCTTGATATTAGCCCATACCCTACACATTTTACTCGTTTGCCCTACAT
CAGATAAAATACTGGCCCTAAGCCCTCCTAATCTCTTCTGGTTACACCTA
GGGTAAAATATCTGCCTTTC
>29
GATAAACGCTGTACAATACCAGTGACTGCACTGCTCCGAAAACGTCCGAG
ATATGTATATTGTCCGAATTTTTTCATACTTTAATAGCTGGCCAGAGAAA
CCTTATAATTTTGTGGCTGCAAGCTATCGCGCTGTTCCTCTGTGACAGGC
AACACAGAACAACTAACCGCCTGTCTTTTATGCCTGTACACTTCATTAAA
ATTTACCGTTTTCTTCCATTACAAGCGGGGACACTTTCCGTTTAAACCTG
CAATATGTTGCAGGGCCTATCCACGCCAATTTACTGTGGCAGAAGTTACT
GCAGTGGAAGAACTACCTTTTCCAGCATAGCCTCCGCCACCAAAAAATGC
AGGTGCTGCGTTTTCTGGATACGTGGCTGGCCTTTAAAACGCATGGGAGG
GACAGTATCTCACCGATTTGGTAATGCCGTGATGCAACCTCGAGGATCCG
GTTTTCAAGAGCGGAAGTAAAAAACCGGGAAGATCTAATATTTCCTTATG
CAGGTATTCTGTGACTAAAAAGTATAGAAGACTATTTTGCACCGCTCCCT
GATTAGACTTCGTGCGATATTATTGATGGATATCGTCTTTATCTTTCCGT
GGACCTAAAACGGCACCCCTTCGTCTAGGATAAACGCGGTCGGCTCTTTC
GAAGACTAAAAAAGCAGCCACAATAACGTTACATGCAAAATCAGCCCACT
CGAAGTTAGATACTGCGTAGACGGATTTGCACGATGCGATGATAAATATT
AGGGACAGTGCGTGCCCACCCATAAGTTGCTGTAGAGCTTACAAATTGTA
AAGACTAATTCCAATCGCACGCCCACCCCTCACGGGAATAAGTTAGAATG
TTGCGGAATGAACGATAACTTCATATTAGGTAAAAGGGAAGAATGCAACG
CTGCGGTCTACGGGCTTTTTTCTGCGAGACCAATTTTCTTCTTTTGTTTT
TTTATTTCGATATTTAGTTTTCATGCAAACGGGTATTATTCTTGACAGGC
CATTATGTAAGAGTGTGGAAACATAATTCTTGCACATACGACGTTTTCTT
AACTGTTCCTGTTTCAAGTTACGGAAACGCCTGTGGCCCAGGTAGCGTAG
GCAAAATCAAGCTCAGAATGGGTTACGTAATTATGACGTTTTCGAGTGCG
AGGATGTCAGAAAGGAGAGCCAGAATTATATATATATGGATGCATCTCTC
TGCATATAAAATTAATTTCCCTTTCGTACAGTTCCCTACTTTTTTTTCCC
TCTTTCGTTTGCAAAAGAAGGCGGCCATACTCATTAAAAACCCCTCCCCA
TTTTTCCTTTTTTTTTT
>30
GATCTTGCTCCTTTTTATATGTGAGAATTGTAGCATTACGATCTTCTTAT
TGAAAGAATAATTAGTATACCAGCGTTCTAATATTTGGGCAGGAGAGATT
GACTGGACACAGTCTAAACCCTTTCAGATACATGGGCTAAATGATGGTCC
ATCGTATTATTAAAGCAAGTAATCGAGCTCCAAGAAGGATTTACGTCCGC
CATCTCAATTTCTTTTATTAGCGTTGCTTCTATAATTGGCAGGACATAAA
AAGGCTGCTAATAATAAATGATGATATAATTAAGAGCAAGCTGGCCGATC
TCTCCATTTTTATGCGCTCCAAGCCACGTCATTTTCCGATGACAGGAATG
CTTTGCATATTTCATATGAGATATACATTGACTCCTTTTCGACCAACCGT
TTCATTAAAGGGGCAGCAGCTGTCAAAAAAGTAGCCGAAAAAGGCGTCTG
GCTTCGAGGAATTATTACCTAAATAGGAAAGGCAGAATATATTAGAAAAA
AAAGAAAAACCAAATGAGAAAAGTGCTGGTGCTAAATAAAACATTATTGA
GGGGCCAAGAGGGGACAAAAGAAG
>31
CCATGAAGAAAAAAGCAGAAGAAAAAGAAATAAAAACGCTAAGCACACGA
TTTGTGTTTTCTTTGTGCACAAAACTTGGCGAACAGCGCCATCTGTGTAC
AGACTGATCGTTCGTTGTACGTACATTTACAACAACACCAATTCTACTCA
CCGCCATAAATAACACTTTAATTTTAATATATACTTTTATATGCATATAA
CCAACTGACTTCCATACAATTCTGACCAGAGCACTTGGGCAGAGCCCCAC
CCAGGCCTTGTCGGAAAAAATCGGAATATCCCACACGATCCACCGGAGAA
TATCGGGACGCTGACGGGTGAATGGAGATCTGGATTTCCTAATTTGGATA
CATCTCTTTCTTTTTTGACTCACAATAGGAAAAAACCGAGCTTCCTTTCA
TCCGGCGCGGCTGTGTTCTACATATCACTGAAGCTCCGGGTATTTTAAGT
TATACAAGGGAAAGATGCCGGCTAGACTAGCAAGTTTTAGGCTGCTTAAC
ATTATGGATAGGCGGATAAAGGGCCCAAACAGGATTGTAAAGCTTAGACG
CTTCTGGTTGGACAATGGTACGTTTGTGTATTAAGTAA
>32
AGAAGTACGTGTTCCAAAAATAAAGCAGAAAGGCGAAAAGGGTCGAATGT
AAGACACTAAATAAATATTTTAAGAAGAGGAAAAGTCGCCTCAGAAACGC
TAAAATGCATCCGATTTCCCAAAGAGGAAGTCTAATGTTTTCGATTTGTG
AAAAAAAGATAAAAATCGAAGAAAATGTAGGGAGCCGCGCGTTACCCGGA
TTGATATTTGAGTGATCGACGGCGTCACAAAAGAAAGAATGCTTGGCTAA
TCAAGAAAAGTATGTGGTTTGTTTCATCTAATACGGCTGTCAAGGCCCAC
ATTGGTGTTCAAATGCATTTTTTATAGTTCGTGGTTACTGTTAATATTCT
TTCCTAGTAGAATGTTTGGGGTTTAGGTATTTTTGATGTTTTATTTATAA
ATAGATATTTATATCTTGACGATTGTGGTGTTTTATTTTTTTTTTTTTAT
ACATTTTTCTTTTCTTCCTGATTCGAAATAAAAGTATTTTTAGAAAAAGG
ATAAAGAAACAGAAATCAAAAGAAATAAAAAGAGTGTGGCAAAATCACAA
CTCGCCGAATTCATCGTAGACTGATCTCCAGTGCTTGAAAAATCCGTTGA
AGAACTTAACACCTAATCCGACATCCTTGGACCCTGTAGCAGCTCTGATG
CTGTGCATGGACAACTGTGCAATTCCCAGGTCTATGGTACGAGCACCTGT
TT
>33
TATTTCGAGCATGCATCTGGAACCTATGTTTACATACGTACAAACGGTAT
TTAAAAGTTTCTATTCTTAGCGTCAATTGCCCTTTATCGTTTTGTTAACC
AATTGTTGTTTTTATTCATTATGCCATGACCCGAAAAATGAGCAAAATCG
GTCAAAGTAAATAGCTAAATATTTGGTCTAAAAAGTAAGAGAGAAATGAA
AATGGCAAGGCTTAACTACTTTGCAATAGTGTATATAGACATTACCAATT
GAGTCCAGCAACGAAAGATTCCGCTTGCACTTGGTCAATCATTTACTGAC
CATAATACGAAGTAATAGAGATGCTACTAAAAGATGACCATGCGATTACA
ATTTACAATAGACAATTAAGCGCAAGGACAATCAGTATGCATTCCATTTC
TAATAGACAAGGTGCTATGAGTGAATTGCTAGCCTCCCCTTTTTATTTTG
TGCGGTCACCGCAAGGGACAAAGCTTTTCTTAGAAAACCGTCTGAGAAGC
ATAACGTACGCCATCCCCTAGACATATTAATAATGCTACAGATACTATGC
TGCTCGTCTTTTTTTGACGACCCTTTTATTGCAATGTGCAACTAATGGCA
AACAACCACATAGTATCACAGTATTACATTGCCTCCACCGATGCGGATGT
TAGGGCGCCAAGTCTGTCATGAAGCATGTTCCTGTCATAATCTTGTATGC
AAAATACCGCGTTCTGCGCCACTGATATGCTAGGCAGCAGCAACCTATGC
AGAAGATTGCTTTTCCCACGCCTGTTTTACGTCTCCAGGGCACTTGAAAC
AATGCAGCGATCGCCGCCACAACACGCCAAAGAGAAGCGAAAGTGGGCCT
GGGCGGCCTCAGTTTCGGCAGAGGTAAACAACACGAACTGAACTGCCTTA
GCTCCGAAGGGCAATTCCACAGGCACTCCGCGGGGCCCGGCCAAGGCCCA
AAAGGCGTGGAATATGCGCGTTTTGGGGCCATAACACCCAGTACCACGGC
CGGAACGGGCCATATAATAAGTTTTTCACTCTCAAGAATGGTAAACGTAA
ATAGGAACATCCCACTACCCTAGAAATTGCGGAAATTTCGCGCTTATCAT
TAGAAAATCTGGAACCGTCCTTTTTCCTCTTTCTTGCATTTCCCTTTCCG
TATTATTGCCATTCTTTAACTGCATTTGGGGAACCGTAGACCAAAAGCCA
AACAGAGAAATGTAACGTTCTAAAAAAAAAACAACGAAAAAATTGAAAAA
TAAGATACAATAATCGTATATAAATCAGGCTTCTTGTTCATCATTTTCAA
TTCTCTTCTTGCCATCCCTTTTCCTATCTTTGTTCTTTTCTTCTCATAAT
CAAGAATAAATAACTTCATCACATTCGCTACACACTAACAAGAAAAAAAA
TGCAATTCTCTACTGTCGCTTCCGTTGCTTTCGTCGCTTTGGCTAACTTT
GTTGCCGCTGAATCCGCTGCCGCCATTTCTCAAATCACTGACGGTCAAAT
CCAAGCTACTACCACTGCTACCACCGAAGCTACCACCACTGCTGCCCCAT
CTTCCACCGTTGAAACTGTTTCTCCATCCAGCACCGAAACTATCTCTCAA
CAAACTGAAAATGGTGCTGCTAAGGCCGCTGTCGGTATGGGTGCCGGTGC
TCTAGCTGCTGCTGCTATGTTGTTATAAGAAATCTCTGATTTTTTATAAT

>34
TATTCAATGGGGAAATTCCATTGTGCGGTAATCACGACATGGAAGCTCTC
TTGAAGGAAGGTATCGACAATGCTACATCAACCAATGATAAGAACAATAC
TCTCTCTAAAAGGAGAACGAGGCTCATCAACTTCAACTAGCATCACTACC
CATTTGTCTTTCCTAGCACACATGTTTCATAACATTCTTAATAAGATTTT
GATTTTTTATATTATTAGCCAGCCTTGTTCATTTATAAATTGTATAGCGC
AGGAAAAAGGCATCTGCCTATCTATGGTATCAACAACATTAGTCGTCATT
AGTTAGTTAGTTATAAAGACATCATTCACTCATATTCACTACGTTGTCTT
CTTCTCAACAACTACCTCTAACTGTTTTTTTACGCGTCATTTAATTGTAG
CGAATTTCTATTTTTGGACATTCTCGTACCGGTGCATTAAAGGCTAAAAG
CTAAAAAGGGAACAGGAGCCTAAGAATAGAGAATAAGGAAATTTATTTAA
GGAAAGGCTAAGCAATGAAATGTTTCGTTATTTTATTGTATTTTCAAGAG
GATGGAAGAAGAACCTG
>35
AAAATTTGAACTCGAAATGAATGTATTAGAGACTGGGTTTCTTCGAGTTT
GCTGAGATCTTGGCTATGCACAATGTTTCCTGCGCCCCTAAGGTGAAAAA
AACATGCATGCTTGTTTCAACAGACCAGTGTGCATAAAGAATTTCGCCCT
TAGCTGCGATTAAAGAGTCAAGGCGTGAAAAACATAGGCGAAAGTGCTGA
CCGTTCTTCCCTTTATCTTTTTACCATCTTCGTTATCTGTTACCTGTTCA
AAAGAAAGTGGGAAAGATATTGGTGTGCTACGGTGGGATCTTTTTTTTCT
GCCATTTTCTATACTTTACTTCCACTTATAAAATATTTTACAAATTCAAG
GGAGACGTGTGACAAAATAATAATCTAGAACTCAATGAACTTTTGTCCTC
ACTACAATTGCCCCTCGGATGGATTTGAACTTACAAGAAATATCACGTTG
GCGCGCGCTAAAGTCGCTTGCCAATGCGCTATGAAATTTTCATGACCTGG
CACATTTTAGCACAGTGCCATTAATCCCTTTATTATGGGCATTGATGCGA
CTTTAAAACTGTACCTTCCTTCGCACATGCTGAATTTTCTTAATGAGATT
CATCTACGATGCTTTAGAGCTAGCCTTGTTTTCTTTTTTATGCTTCAAGA
GTAAGTAGTGAAGAACCCCACTAGACAAATACTAAGGGATGCTGCAACCA
CGTCTTATACTTCACCCATACATAACATTGGAATCTCATTAATTTTTGCA
AAGATATGGTGAACAAGTTTCAAAATAAGAATGTATGTGTACCGAATCGT
AGCTCGAGGTAATAATGAAAAAAAAAATCGGACATCTGGAAAGTTACGAA
TATAGAAGCAGATACCCCTCTTGACGGCAAACATTGTGTGCTCGACCTTC
TATCCCGTTAAAATATCATAATAAACAAACCCCTCCCGCGAAAACAAAAA
AAGAGAGCTAAAAAAAGTACTTCTTCGCGTTATAGATGGTGCCGCACCGT
ACGTCATAACTAAAAATAGCGTTAGCCACAGCTCCCTGAACGAAAAGGGC
CCTTCGGCCCGATTGGAATACGGGTCCGCTTACGTCTGTGCGTGCGGGTT
GTCCCACAACGGTAACTTACTCCAGGAGAGCCATCTCGAAGGTGCCACAA
AAGAAAACAAAAAAAACAACAAACAATAAGCTCTGTGGTTCACGTTCAAT
GTAGTGTTTTTTCACCTTTTAATTTTGATAATTTGTGGTGCAGAAAAAAA
AAAAGCAAACAAACAAAATCTCAATTATTTAAAGGACGATCTTAACGTTT
CTTTCTTTCGCTATCTTCCTTGAATTTTTTTTCTGTCTGAAGTAAAATAT
CCCGTAACAAACTAATAAATACTACGAAAGTCTCAAAAAACAATAATGAA
ATTCTCCACTGCTTTGTCTGTCGCTTTATTCGCCTTGGCTAAGATGGTCA
TTGCCGATTCCGAAGAATTCGGCCTGGTGAGTATCCGTTCCGGCTCGGAT
TTACAATACTTGAGTGTTTACAGTGATAACGGCACTTTGAAACTTGGCAG
CGGTAGTGGCTCATTTGAGGCAACTATTACCGATGACGGTAAACTGAAAT
TTGACGACGATAAGTATGCTGTTGTCAATGAGGATGGCTCATTCAAAGAA
GGTTCTGAGAGCGATGCTGCCACTGGTTTTTCTATTAAAGATGGCCATCT
AAACTACAAGAGCTCTTCTGGTTTCTACGCTATCAAGGACGGGTCGTCTT
ACATTTTCTCTTCTAAGCAATCCGACGACGCTACCGGTGTTGCGATTAGA
CCAACTAGTAAGAGCGGATCTGTTGCAGCAGATTTTTCTCCAAGCGACTC
TAGTTCCTCTTCATCTGCTTCTGCTTCGTCTGCTTCCGCATCATCTTCTA
CAAAGCATAGTTCGAGTATAGAATCTGTCGAGACCTCTACTACTGTGGAA
ACTTCCTCTGCTAGCTCCCCAACTGCTTCAGTTATCTCTCAAATTACTGA
TGGACAAATCCAAGCTCCAAACACAGTTTACGAACAAACAGAAAATGCAG
GTGCCAAGGCTGCCGTCGGCATGGGTGCTGGTGCTCTAGCGGTCGCAGCT
GCTTACTTGTTGTAAGTACGAGAACAAAACCTGCATGTTTTATTTCCTTC
AATATAGCTTTCTACATAATGATCACTTACATATAGCGTAATGTAATATG
AAATGGCCCATAATATTCTCTTACATTGTCCTCCTACCTACATTCCTTTT
CTTGCATGCAGCTCTCACATTCCCCGATTCGCTTGAAAAATTTAAACTTG
TAGAAAAGTAGGTGAATGTCCCGCCGGCGGTTTCTCTGCTGCATGTAGAA
AGATGGATATACAGAAAAGGAGATAAGAGTAGCTATCTCAAGTTTGTTCC
ACTGACTGCTAATACGCATAGAGTTGTTATTTATTGTACATATTCGAAAA
AAAGCAAGAAATCACTACGGTGACCTCAGTAGAACGAA
>36
AAATTATACTATGAAAGAAAGTAAGGTATTTCTATTTTTTTACTTTTTGT
TATTTTATTTATGTTTTTCTAGGAAATGTAAAAATAAATCTTTTAGTAGA
CAGCGAGATGAAAACTAATCTGTGTGAGCTTCAATCAATCAATATGATTT
CCCCGCATTTTGTTTGATATTTTAATTGATTCCGATTAAATCCGCTGGTA
GCAGTTTTGTTTCAAACTAATTCAGCCTCCTTACTCCCCATTTCCTTATT
GAACTTTGGGGATTCGGAGTTCCTTTTTTTTTCCGCCACTCCGATAACTA
AACTTTGCAGTTTCACTGCTTGTTAAACATTTTCCTACTATAAATGACAT
TTAAAACGTAATTGAGACAAAAAAAGTTAAATCGTTATTAACTTTCACTG
CGGCTCCGCTCTTTTCCTCATAAGGAAATCCCCTCTTATGATCTTGAGAA
ATGGGGGAATGTTGAGATAATTGTTGGGATTCCATTGTTGATAAAGGCTA
TAATATTAGGTATACAGAATATACTAGAAGTTCTCCTCAAGGATATAGGA
ATCCTCAAAATGGAATCTATATTTCTACATACTAATATTACGATTATTCC
TCATTCCGTTTTATATGTTTCATTATCCTATTACATTATCAATCCTTGCA
CTTCAGCTTCCTCTAACTTCGATGACAGCTTCTCATAACTTATGTCATCA
TCTTAACACCGTATATGATAATATATTGATAATATAACTATTAGTTGATA
GACGATAGTGGATTTTTATTCCAACAGATCTTGATATAAGCCCTGTCATT
GATTGCAAATGCACAAATTCCGGAGATTGAACAGCCAACACAAAGATAGT
ATTTGGGACTTAGCGGGTTGAGAACGGTAATTATATCATGAATACTCCAC
TCCAAGCTTGTTTGATACATCACATTCTTGTAAAAATATATGATCCAATT
CCTAGGACATCAGAAAATATATCTACTATGGGCGTGTGGCGTAGTCGGTA
GCGCGCTCCCTTAGCATGGGAGAGGTCTCCGGTTCGATTCCGGACTCGTC
CATTTTAAAATTTCTTTTTTTTTTTTTCTCTTTCCGTATGTAAGCTTTTT
TCCTTTTTTTTTTTTTTTTTTTTTTTTTTTTCTTCACTACTTTTCAATGA
AACTCTCTTCA
>37
GAGTCACTGATGCCTACTGCTCAATCCAACCATCTAGTTCTGCAAAGATA
CTTACTCCGCATAATTAAAAAAATAAGGTATTTTAAAGTTGTGTAGTGAC
GAATGTAGTGACGCGGAAACGTTTTACTCGTCAATGGACATTTGCGAATG
TGTCCGATAAATAGTTGAGGCTTTTCCTGCATTCTGTCAAGAAGGGTATG
TGTATGAACATGCAAATGACACTGTAAAATGATTCATTACCCTGATTATG
GAGTGATTTTCTTTCCTTTTTTTTTTTACATTTAGTTTCATTATTATGCA
AATTAGAGGGTATACAG
>38
AGAGAATATGTCCAAGCCAAGCGCAGTGTGCATGTATGCTGTTTTTAGCA
TATCGGGTGTGCGAAAGGAATGACATAATGATTTGCAACTAATATTTCCT
TATATAAATATGCTTCTGGATATGAGTCTCATGAAACAAGTTCAGTAATT
GCTTGTTTTACCCTTACTTTTTTCTTGGTTATGACTTGTGTACATAATAA
ATTGCCTATTTTCCCAAATTGTGTCCTTTTTCCTTTCCGGTTGGTATGAG
ATATTTCTTTTCAAAAATCAAAAGAAAACAACAAAGGGTTGATATTATGT
AATGCAATACCTAGAATCGGGAAAAACTTGTTTGTCGTACCAAGAGAGGC
AGCACTGGCGTGCCTTGATTTAATATAACTCCTGAGATAGTGGGGGTTAC
ATGAGTTGTACAGCATAAGACTCCCTCTCCCCAGTTCTGTTCGTATATGT
CGGGCTTGCTTGCGAAAGCAAGGGGTTCAATAAACAGAAAACAGAGTTTT
TGGATAAAGTTTAAACAACGGAAACAGAGCAACAATGAAGGAGAGAATAA
GTATCAATTGTGTAATTCTGTATACCGTAGTGCACAGTACGCTGTGCGCA
ACTCTTGCCTAAAAAATCTAGTTATCAAGCGGGGTGAATATGCTACAATG
CCTCTTTTACGTTGTACTCTATCAAGGGATGATAGCAGTGGCACATATTG
ATTGATACGACTTTTCGCCGCGCGGTAGGCGAAAAGCAAAGAAAACTACA
GTAATATCCAGAAATAGATGCATTTTATGTGCGAAATAAAACTCATGCTG
AAAAAAATAGTAATAATTAATAGGGTAACGAATAGAATGCAAACCTTATC
ACGTGAAAGAGAGAACAATCATAAATGATTTAGTGCGTAGGTCCAGATTT
GCGAAACACTGCGGAAGGCGAGAAAAGAATTCGAATATGAAGTAGGTAGA
AGCAGAGGTAGGGCCGCTATTTAAAGATATACTTTTTCTGTACGGGCCGG
TGACTTCGCAGTAGTGATGTACTATGAGATCACTATTTTGCCGGAAACTG
TAGGCAAAAACCGTTTATGTCTTTTTTTCACCTTACGGGATAACCTCTGC
TGAGAATTTCCAAAACTAGGCATGGATGATTGCCGGAATTTGAAACCCGG
GCCCCGGAGGTTGATCGCACGGCAAATACATAAGAACCTTCTCCGCAATA
CGGGCTTTCCTCAATTTTCTTGGCCAAAAAGCGAGTCGGCCCCGAGCTAC
AAATCGGGAACAACGGAGGAATAGAGCGACAAGTTGATTCGGTCGTGCAG
CCCGGAAAAAAAAGGCTGTCCTGCGGGCTTTATTCACTCCAATGCCGCTG
AGAGGAACACGCGTTTCGTGGGCTTTGGACCACTACCCCGGCGTTCAGAG
AAACCCCCCGGGGCAGGGGTCCGAAGTCTAAAAGTTTAATCCGGAAGTAG
CGACGGGGGGGAAGCCCGCCGCGCACAGATGGCCAGCACAACGGAGCGGG
GCCGAGGCGGCAAACGAGGTTAAGCCCGCTGAACCTGAAAAAAAAAACGA
AAATTTTCTTTCATCAAGGACTAAAGTTTTCTTATGTTACGGATCTTGCA
CGCGGTAAGCAATGGCCGTAGCCTTTTCACAGTTGCTTCCAAGTGTCATG
TA
>39
CATATGAAATACATATCTATGAAAAGTACTGCACCATAATGATTCAACAA
AATAAAATGAGTAACATTAACATCACGCTAGTACTGCTAGATTAAAAATA
ATAATGAAAACTCCGATACGGGGAGTCGAACCCCGGTCTCCACGGTGAAA
GCGTGATGTGATAGCCGTTACACTATATCGGATTACAAAGGATAGAAAAT
TGAAACGTAATGGAATTACTCATGTAAATATTAAAGAACTCTTTTCATTT
ACATGGATAATTGGTGAATGTTGTGGGGAATGTTGGATTTCATTGCTGTT
AAAGGCTATAATATTATGTGTACAGAATACACCGTGTGTGATAATATACT
AGTAACACGTATACTACTAAATGGATGATA
>40
ATATGAATATTACTAAACAGATGATATTTCAACATCATGTTTTGCTTAGT
AGACTCTTGCGGGCGTTCCATCCGTGTGAAATACATCATTTACACCTCGC
TCTGGGTCAAGTAATCAAAAAATACCTCGTCGAATATCTTCGACAAATCT
GTCGCTTGGTTTATGTTTGACCTGATGTATATAAAATCATCACTACCCAA
TTTAGAGAACACATTGCGTTGCCCGGCCGGCAAAAAATCCTGGGCCAAAA
GTTAAAAGAAACTTTCTCATACTCACTCTGAAGTTGTACTATTACGAAGC
ACTAAAGCATTGATAGATAAATCAACACAGAACATACATGATTAAATTAG
ACACAGCTCTCTGTATTTTTTACTGTTTGAACTAAGGTTCTAATACTTAC
ACATTCTTTTCAACCCATCAGATGGTGTCTTGCCCCTGCTTACGTAACCT
ACAACAATAGATTAGACACACCAGTGCCAAGGACAATATGTTGCGTTCTG
ACTAGTCGAAGTATCATTACGCTGTGCAGATCGACCTGACACCAGACACA
AAGGAGAATAGGGGCAGCATGAGTTCCGTCGGCGACTCATTCCGACCTTC
CACAGGTCCGTTGATTACTTTTTCACTGATCCGGTGGAATCTATGGTTGT
TTTTTTCATCATGATATCTGTTTTAGGACTTTTTTTTTCAGCCGATCGCT
TATCTGCTCACTAGAATCGTAATCAGTGATATTTTTATTAATAATTATTA
TTTATTTTTTTTTATACCATTTCCTTTTGATAAGGGGTCGTTGGTGCCGT
GCCGCTATCAGGCAGCCTCACTAATCTACCCATTGACCTCATGCAGCAAA
GTCACATCGCCCATATCTCTCGAGTGCGATAACGGGGAACTTGATTTGGT
AACTGATAAGATTGTTAAATGTCAGTTTGGATGCTTTTTCTTACGTCCGA
TTAGCTTATCTTCTGGAGCAACCGGCCATTTACCTCCTCATAGTAAATTA
AACATGATAAGCGCATAGTTGGGGCAACACACCTTTCTTCCGGAATTCGC
TCTGGATGAGACATATAAAGATGAAGGTGAAGTCCACTTAAATGAATGTC
AATGAGACGATGTTTTTTCTCCTAGATTGATTTTTGAATTCCTTGTATAC
AAAGTCTTGTTTTCTTATTGTCCTCAACAAAACAAAAGTAG
>41
ACGAGCTAATATAACAGAGTGAAGAAATGAAGCAATTACGCACAATTTAT
TGTACTGTGTTCATTCAAAACTCTTAAACATATTATTTTGGCATTTTCAT
GAGCCCCAAGATAATATCATTTGTTACGTAACATTCTCTATGACAGTAAT
GGTTTTCTTGAATGACACAAGTAACCACTACAACTTGGTGTGCAGAATAG
TGATAGAGCGAACTGAAATTGTGGGTACCTAAATATTCTTTGATTATGAG
CGGA
>42
CTCAATTTTCAAATGAACCGCGGACTTCACTTTCTACGGTCGTTTCTTCA
AAAATCTTTACAACGTATATCGCCTGTTGCATTGCCTTTTTCGGAAAACC
TTATTTTACGACAAACCTTTTTTAGGATTAAAGTTTAAAAAATTTCTTCG
TCTGCCTCAAAATTGCGCAGCTTTAAGCTTCCAGAATGTTTTACACGAAA
TACCCTAGCGCTGCATTTCTTTTTTTCCTCAGTTGCGGTAGTAGAAAAGT
ATTACATCAGCACGAGTAACAACTTATGGTGTCAGTTTCATAATTTCACG
CACTAAAGTTAATTTCCCCTTTTGTTCAAAAACTTTCAGGA
>43
TCATTCTCTGATTTTATATTTAGTTGGCGAACTAGCTCATCCTAATTATA
ATTAAACTTATATATAGCATAAACCGACAATAATGCGTGGGTGGTCCTCC
ATGCCGAATTTGTGAACTGAATTATTATCTAAGCACTGGATCGATCACCT
TAAGATGATATATTATTTATAACTAAAACGCAGCAGCATTACACTCCAGA
GTAACTCCTGAATTTCGTCATGGCATGTACTTATACTAT
>44
AAAAGCAAGATCCGATAGGAGAAGACCTCTTTAGCGGCTTTACTGCGCTA
CAAATAAGGTTACGAATATGCGGAATAGTTCATGATACGTTGTTGAGTTA
TAGTATGTAGCCAATATTTCCTGTTTTTCCGCTGTTACCCTTTTCGAAGG
ATCGATGAACGCTTCTGTCACTTAGTAAGCAAATGTACGAAACCCAGAGC
ATTGTATGTACACCAGCAGTCGTTTTTTGTAGCTCTTTTCCATGGATGGA
CGATGATGGCAAGACGCGATCGTGGCGGAGCCTCACTAAGAAAAACAATT
GTGGAGAATCTATACACACAGAAATCGTACTTCAAGAAATATTGATTAGC
GAGCCTTTAAGCACAGAACAATCTCTATAGCCAACATCTTGTGGAAGCTA
CAACTGTTTTTCTTGTTCCCGCTTGAGTAGGGCCTTACAAGGCAAGACCG
TATAAAATAAAGATAACTCCTCCGCCGTATCCTGAATTTCGTGTGCCCTT
TCTCTCTCTCTCTCTTCCTCTTTCTTCCTTTCCCTTTCCCTCTTCTTCTT
ATCTCAACAACCGCCCAGCGCATTAGCAAACCACAGTACGAGCTGTACGG
CTGAGCCACTGCACCTGTCTGGCTTGCCCCTTTTTGTTGAGTAACCGGGT
AATAATTCGGCTGTCTAAACGATACAATCCTCGTTCCACCCACACCCATT
CACCCGTCGGGCGAAATCCACCCTCGCGGCCTCGTTTAGAATACCAGGCA
ACGGCACCAGCAACGGCCCCGGTAACTCGATCGCGTTCATATATATCGGA
TATACTCTTGAGGCACAATTTTTTTCGGTTTTCGGTTTTTTCTATTATTC
TTCGAGATGCAAAGCACACATTTGAGACTCACAACTCAAGATACCGCAAG
CACACAGACGCTATTGTTCTCCCAAAGAATAGGTTCCTGCAGTGCTCTTT
TAAGGTTTGAAGATATTGCACAAAATTGTATCTGATTTCATCTCATCGAA
CCTCATTCCATCAACTTCCTTTTATCAAAGCATCTTGTTTTGTTTTCGCA
GAAAATTTTTCTTCCCTTTCAATTTGGCCTTTTAGTTTTTCTCCAGTCGC
AGGCAAGAAGGTAAGGAAATAGAAGAAAAAGAAAAAAAAAAAAAGGGAAC
AATAGGTTAGATGTCGAATACCCCTTATAATTCATCTGTGCCTTCCATTG
CATCCATGACCCAGTCTTCGGTCTCAAGAAGTCCTAACATGCATACAGCA
ACTACGCCCGGTGCCAACACCAGCTCTAACTCTCCACCCTTGCACATGTC
TTCAGATTCGTCCAAGATCAAGAGGAAGCGTAACAGAATTCCGCTCAGTT
GCACCATTTGTCGGAAAAGGAAAGTCAAATGTGACAAACTCAGACCACAC
TG
>45
AATGACATGCTGATTTTGTCTACTTGCGTGTGCTTTCAGTTCTTTACCAG
TACGATTTGGTCACGTGACACGCGATCAACTACATTCAATCCATCTGCCC
CTTGCTGGTTCCGAGTATCAATTCTAAATTGTGGCTACCACTATAGCAAT
AGTACGCCAAGCTCGGATGCAAATCACGGATATCTTCTTAGCATCCGAGT
TCAACATCCGAGTTCAGCATCCGAGCTTTGCGGCGAAAACTTAACAAGAT
AACGGATAATCAAAGTTCTCTGTGATGTTACGGAGTCTTTGGTCTGCGCT
GCTGACTAAAATAGTGTGACACAACGTACATAGCGCCACCCATATTGGCC
GATAAGGACCAGACTTGTGGCGATGACTGTTAACTCTCCGCGAATCTTTT
TCGAAGTCGCAGGTGGCATTGCAGAAACAAAAATGTGTGGCTTCTGAAAA
AAAAAATAGGCACCCCATTTGATGTAAGACATCTGGCTACCCCTTGTACA
TTTCAGTCACTGAGCATCGAAGGCACGTCTTTGCAGCATGCAATAGTGTT
CGAAGTTCTTCCATTTACGGTGGCTCCCCTCACTGGAACGGTGATGTAAT
ATGTAGATAGCTAAAACATTTCGCAGGTCCCTAGGAACTGGACGTCAAGA
TGAATAG
>46
GGCAATCCATATTTTGTCTTTTCGCGCCCTGGAAAGGCCTAAGTAATGTC
GTAAACGCATTCTATCTGTACTTCAACTCTCCTCTGTGCATTGGTTTGTG
CAAATCACATTTTACGATACTGCCAGATTTATGCAAAAAGAGAAAACCAA
GGGACCAGAACAAAGCAAAATTACGATAAACTTCGAATTCCTTCGTGCTT
GACTAAGACAAAGGGATGGACGTAGCGATTTTTAGCGGGCCAAGAACTGG
TTCCGAAAAAGCACAGGTACACCGAACCCTCAGCTAAGGAGGGACAGCAC
CGATGCGGAAGGACAAACTTTCTTTTTGCCTATCACAGTATCTTATCGAG
CTAACTATTTTCGACACACATGAAAAAGCAGAAATATTAACGAAAAAGAA
AAGAAAGACCATGTCATGTACGGGCAATCAGAATCTGTAACAAGCGCCAT
TTTTTTTTCTGTATCGGGCCCTCCTTACTGCTCTCCTTCCGTGTAACGCG
TTATGAAACTCTAATCCTACTATCGGCGACTCTCTCGAAATTTTTCTTAA
CGCGTCCTTGTACTGCGTCTAACGCTTTTGCCACTTGGATTTCTATTATA
GGAAATAGTCTCACTTACTGGGCGACGAATTTTCGCGTTTTGATGAAGCA
CAGGAAGAATTTCTTTTTTTTTTGGCTTCTTCTGGTTCCGTTTTTTACGC
GCACAAATCTAAAAAAAGAAATAATTATAACCTAGTCTCGAAAATTTTCA
TCGATCCATTCGTTCCTTTTTTTCGATTTTTTCAGATCAAAATTCTTGTT
TCTTTCTTTGTCTTAGTTTATATTAAAAGATATTTTGATTTTACTCCTGA
ACTATTTATTCTTTCTAAGAAGGCCAGAACACTACAGCTGTTTTAACCGA
CTACGAAGTTCTCCATTCTCGAACACTAGCCTTCATTTACCAAACAGGAA
CTAGCGTATATCATTAGTCCTTATTCGAAAAGAG
>47
TTGATGGAAGACGAGGGTAATGAAGAATACACCAAAGATTTGGAAGAAGC
AGCTAACAAAGCTCAACCACAGTAGAATGGAATATTGAAACTGGAGTGAC
TTCTGATGAAGTTTCCAATTATTTATATGTATACATTATTTATTTGTCTA
TCATTAAAATTTCTGTCAAGTAATGGCTTTTTATGTTTATTTCATGGATT
ACGAAATTTGCTGGCTTTTTAGAGTGACCGATGAGTTGCATGTACATATG
TGCGAAATAAAACAATACGGTAGTAAAACATGAATACTTCGAGAAGTAAA
TTCAAGATTGCAGGCGTAGCACAAGAATGTCCTTCCGCCTGCTAGTGTGT
TGAGCAAAGCACGCCATCACTAATGGAACCCTTACAAAATCTCGCATGGA
GCAGCAAACCTTAAATCCATTTTCTATCATTCGTTCCTGAGGACCCGGAT
ATCGTTTTAGAGACAAAAATAGATACTACAAGAGGAATAGGGATATCTGC
ACATGGGGCCTCGAGCATGGCTCATTTTCGATTTTCCGGCACGATGCTGA
CTTAGTACTATCATGCCAGGCAGGACAGGCCTTATGGGGTTCTTGCAGCT
TACCAATTCTGACACTGGACTGCCCCTGGATTAGCGACCCCGCGACCCCG
CGACCAGACTCCCTGAAAATGGTAATTGGTGATGATATATGTGACTGAGT
TCAGCCTGGGCATACAATGTTTAACCCTTTTGGACATGGAATTAGGCCAG
CAAAGGGAGCAGCTTTCCCCGAAAGCGTAGTTTTTCTCCAGGAACGCAAT
TCACCCCTTTCTTTCTTA
>48
CACGTCCTGAAGTTGTTCGTGTTCTTTGGATATTCGTGTTCAAGCTAATA
ATGAGCCTTTAAGGTAATACAATTTATAAACCACCACCTTGGCCTCGATC
TATTGCGCTTATGTTGTCTATTAGTAATCAAGAAAAGAACCCTAAATCAT
CGGCGTCCCCTGTGGGGCTCTCGGAAAAACCGGTCCTGACGTCACTGAAA
AGATTTCGGCACATGGTCATGGGACCAGAGAAAAATTAATCCGACATGTG
GAATATTTCCTTCCGTTAAGGTAGTGAGCGCGGATTTTTTCTGATTTGTA
ATTATACGGGGAGCTCTGGCCAAAAAGGTCAGTATTTGGTGATGAAGTTG
AATATCATCTTTTGATTTTCTTCTGTATCATTCTTTTTCTTTTTCCACAC
CCCTTCCGGACGGTATTCACATATTGTTGAGAGGTTAAATGAAAAATAAA
GGGGTGGAAAATTAAGGACGAGATGTAAGGGAAAAGCATAAACGAAACAT
TATATAAAGGAGCACAATTTCCTCTCCCTTGCCAATTGTGCATATACCGT
TTCTTTATAACGAAATTTCAACAAACCAGAACAACACAAGTACTACCAAT
AACCACAACAAAACATGTCTGACTTAGTTAACAAGAAATTCCCAGCTGGC
GACTACAAATTCCAATACATTGCTATCAGCCAAAGTGATGCTGACAGTGA
ATCTTGTAAGATGCCACAAACAGTTGAATGGTCCAAATTAATTTCTGAAA
ACAAGAAGGTTATCATTACCGGTGCTCCAGCTGCTTTCTCCCCAACCTGT
ACTGTCAGCCATATTCCAGGTTACATCAACTACTTGGATGAATTAGTTAA
GGAAAAGGAAGTTGACCAAGTGATCGTTGTTACTGTTGACAACCCGTTCG
CTAACCAAGCGTGGGCTAAGAGTTTAGGTGTTAAGGACACCACACACATC
AAGTTTGCCTCCGACCCAGGCTGTGCTTTCACCAAATCCATTGGTTTCGA
ATTAGCCGTCGGTGACGGTGTTTACTGGAGTGGTAGATGGGCCATGGTTG
TTGAAAACGGTATCGTTACTTACGCTGCCAAGGAAACCAACCCAGGTACC
GATGTGACCGTTTCCTCAGTCGAAAGTGTCTTGGCTCATTTGTAGATGCT
ATGTAATAGACAATAAAACCATGTTTATATAAAAAAAATTCAAAATAGAA
AACGATTCTGTACAAGGAGTATTTTTTTTTTG
>49
TACAATAAGCTCGATTTCAATAAAAACAAGTGTGTATGCACAAGAGGCAA
CAGAACGTCAATGCCCAGAAAATGAAGTATTTCGGCTTTTCCTTCCAATG
CATTTTTTTTTCATTAGAACGCTGATCAGCTGTGTATAGTTTAATTTTAT
TCTCATTTTCATTTTACAATTTTAAGAGCCGCCGAGGCCTAGAACGAGAA
ATCCGTTTCCCGCTTTTTCTTCTCCTTACGTCGTCAGATTCTATATGGGC
AGTTCTCGCGTTATTCGTCATCAGGCAAGTAATTATGCCCAATCAGCTTA
CCAATGTCACATAAAGGAACCACTATTATCCCTTTTTGGTAATGAAAAAC
AACACTCTTCCGGTACGACAGCCGCTGCGGCAATTACTTTTCCCCAAAAG
CTCATAATCGATCAATTAACGCGTAAACGAAAAACAAAAAAAAAAAAAAT
ACGTAAATTAGGTCTTCATACGAGCGTTTTTTTTTTTTTGAGGATCGTTT
GCATGTCTAGCGCGGCAAGCGTGTTTACAGGCATTCGTTGTGTGTTCATG
TTTAGAACAAATGCTAAGTGATAATTATAACTGAATCCTACTCATAACAA
TTGCACACCTTGTCGCTTTCTTTTACTCAAGGGCGACAAAACGAGAACAC
ATCCTCGAGCTATAGCCGCGGGGCCTGCTGACTCGAAACTCGTCGGGCTT
TGCAGCCATAATCCAGGGCAGTGGCCGCATCGTTCGGGTCGAATGGAGGG
CTAGCTACTTGTGATTTCCGAAAAACGGACTGCAAAAAATGAGGAACAAT
AGAACACCGCGCGCTTTCTTTTGGGGCTGTCTGGAGAAACCAGTGAAAAG
TGCGCACGCGTATTGCGGCTTAAAAAGATACCCGTCCATTCAAGAATGGC
CGATTTAACAGAAAAGAGTAAAGAGATGAGTTTTGCGAGATCAGAAACAA
AAAC
>50
ACCCTTCGGTAGAGTCTCTTCTTGGTCCATTTACTAGAGTTGGCATATGT
GTGGTAGTATGAGGGATGTTTCTTATATGTTCGCACTGTTATTCTTAGGC
CTATCATACAAAAAGCAAGATCAAGACAAAATACACGTCTGTAATTGCAC
TACTTGTTGCTCCATATATATACGTACATTTGTTAGCGAGTGAAATGGAT
AATATTGCCTATACATAGGACGATCCTTATAATATAGTGTGGGGAAGATG
CCACAAGTTGGCAAGCGACAGGAAGAAACCAAGCAAACCAAAAAAAAAGT
AGTGGGTATTGGCCAGTTCGGCAATCTTCGCCTTCAAATTCCCTGTCTCA
ACTTTTTAAGCTTTCTTGATATGTGGGAATACCAGGCTATTGCTGCCTTG
CGTTGGCTCTTACGCCCTTAACATTACCTAGCTTTACTACATAATGAGCT
TTCGGGCCCGCATAACTCCGGGTGTCCGCACGACCGCGACTACTAAGAAT
AATAATAATACCCCGGAGGTGAATTCAAAAGCGGCGATTCCATCCGTCCG
GAAAAGAGAGCAGAAGTTAGCCCGGGACCATGCAGTTTGATGGGTTGTCT
ATCTTAGACTGGAAAATTCGAAGAACTCATCCTTGTTAGCTCAGTTGGTA
GAGCGTTCGGCTTTTAAGCGCATTTGCTTAAGCAAGGATACCGAAATGTC
AGGGGTT
>51
TAGATCGTTGGACTAAAATCTGCGTCACAATCGCCTAAACAGGAAATATT
GCCTATTTTCGTACAAGGTTACTTCCTAGATGCTATATGTCCCTACGGCC
TTGTCTAACACCATCCAGCATGCAATACAGTGACATATATATACACCACA
CCCACACACCACACCCACACCACACCCACACCCACACACACCACACACCC
ACACACTCTCTTACATCTACCTTTACTCTCGCTGTCACACCTTACCCGGC
TTTCTGACCGAAATTAAAAAAAATGAAAATGAAACCCTCTTCTTTAGCCC
TACAACACTTTTACATAGCCCTAAGTAGCCCTCATGTACGTCTCCTCCAA
GCCCTGTTGTCTCTTACCCGGATGTTCAA
>52
ACATAATAAAAGGAGTAGAAGAAAGTGGTAGAGAGGAGTACAAATCTACC
TGCCAGAACTCTCTCCTTATATATATTTCCAGTGGTGTCTGGATTACCTA
CCTCAAGCCATACCATATCCATACCATATCCATAAACGCCTACAAAATTT
CTACCCCAATCCAGCAGCTTCTATCACTATCTCGTATACCACCATAGGCA
CCACCACTGTTTGTGTAAATTTACTCCTGAGGGGGGGGTGGCTCAACACG
GTGTAGGCCTTCTTCCCGCACAATCCGATGAAACCCCACAATCGCCTCCG
TCTCTTCCACTGTGCACGGCGCTAGCTCAACATCTTCCCCGCCACATTTA
CTGTGGCAAAGAAGGTGCATAATCTAAAAAAACATACGTATGAGAATGGA
AAGGGCAAGATAATATCGGACCGTAGTGAGTCACTTGCTTTTGGTATTGC
AACCAACTGCCGCCCCTCTTCCCGCTCTTGCACCAAAACGCTAAATGCCC
ATTGTGATGGCTCATCCACCCTCACGACGAAGTAAGACCCGGGGCACAAG
AAAATACGAGATCATAACAGTTCGAGTCCGTTTATTGTGTGCGGTTTTGG
TACGCTTTTTCGTGAGGTGTACTACCATTCATGAGAGTCGTTTTAGGAGC
TGTCATGAAAGATATGTATCTTGTTGATGAACTGTAAAAATTTGCAGAAA
TTGCGCTATTCCGTTTATTTCATTGTCGATTCGGTGTTAATATTAGGGGT
ACAAAATATACTAGAAGTTCTCCCTCGAGGATATAGGAATGCGCAAATGG
GCATTTGATGTGACACAAAATTTGGACAATATAACGATTCATTTTTAGAT
CGTTGTTCAACCGTCCCAGTGGCCGAGTGGTTAAGGCGATGCCTGCTATT
TCCTCAGAAAAGCAATTAGGCATTGGGTTTTACCTGCGCAGGTTCGAATC
CTGTCTGTGACGCTTTTTTTAATTTCTTTACTCCATGACAAAAGCGGATA
AAAATTCCCGCATTCGGCGTAAAAAAATCCGGTTTTTTTTTTAGCACTCG
CTGTTTTTGCCTCTACCGGGTGAAAAATGACGATGAAGACGGCTGGAATT
GCGCTGCATCCGCTTACGTAGGATAGAACACCTACAAAG
>53
CGGTTGCGGCCATATCTACCAGAAAGCACCGTTTCCCGTCCGATCAACTG
TAGTTAAGCTGGTAAGAGCCTGACCGAGTAGTGTAGTGGGTGACCATACG
CGAAACTCAGGTGCTGCAATCTTTTTTTTTTTTCCGCGCGCAAGCACGTT
ACCCGGACCCCGTCTTAGCACACGCACACGCACACGCAGCGCTCACAGAC
CAGCGAAACAGACCTGAGAGCCACGATGCAGCACACGCTTACCCGGACCG
CCTCTCTGCCAGAACGCTCGAGCAGCGCCCACAGCGCCGCTACTGCGTTA
CCCGCACTTCGCCGCCCGCCAGACAGCTGCGAGACTCTCGTCCCGCTACT
GTGTATCTTTTGGTTCGTCTTCGTTAGTATGAGCCCGCTCCCGCCGGCTC
GTGCCAACAAATCAGACAACAAAGGCTTAATCTCAGCAGATCGTAACAAC
AAGGCTACTCTACTGCTTACAATACCCC
>54
CAGAAAGAAACAAGGAAAACAATGCAATTAATCATTAACTGCACCAACTT
TTATATGAATATATTGTGCTACATGTCTTAATTAGTCCTCTGTGAATGAG
CATCACAAAGAATCACGAGGAAAAGATTGATTACTTAATATTGATAGGAA
TCAGCCGCGGAAATGGAAATCTTGGTAATATAATTTTAATGCGGCACGCT
GAAAATTGATGGCGGCCTGCTAGGAGCCCTATTGATTCCGCGGAAATAGG
CGGATTATTACAAACGTTGAGCATTCAGCAGGTGCGCTGTGCCTTTTCAC
TTTCAGCTAAGATGTTTGCAAGCAAGAATTAACAGATAAGCCGCTTCGCT
AGTAACGCAACTCATTGTGTTTTTAATGGAAGCTAAGGATGGTTGAAATT
ATGGGTACCCTGAGATAAGATTATTAACTATGATGTAAGTATTAATCATT
ATAATAAGGGGTACCTGCTCATTCGCATTACCATACATTGACTATTAACG
AGCAGAAAGTTTTTGGAAGTTTTGCAGATGAAGTGCATGTTTGATAATTT
GAATATGCGGATTTCCTTATTCAAAACTTTCTTTATGCATAGAGCTAATT
AGGTTTGAGTTAAGGAAAAAAATCTATCATAAGTGTCTTGAGGTATTTAC
TATAATGTATACGGGAAATATTAGGTGTGATAGGCT
>55
TTTAGTTCTACTTCCAAACAACTGGTCCAGAATGAAACACCACTGGACAC
TCATTGACTACTGAGACATGGAAGAGCAACATTCTCGCGTATATATACTT
CTCAGCCAATTTTCCTGCGAGAAGCGCTAAAAATACCGAGCTGGGCTTGG
CTGATAGTACGCCCGATTTGGAAATAACGCTCGAGGCGTGCTGCGTCCTT
TTTTGCCTGGCCAGGCCAGGCCGGGTTGTCCCGCACCATTCAACGGCGGC
TATCTGGCGATGTTGAAAGAGGGGGGGAGTGGAGAGGGCTCTGAGGGTCA
AGTGGGAGGCTGTGACAGTTCTCATAAGCTGGGCACTGAGATACATGGAA
AGAAATAGGCTGTTCACAGTGTACGTCAATGTGTGGCTGACTAACCGTTA
GCGGGGCGGAACCGACATGTCTGGTGCAGTGTATGTAAGAAAAAAAGAAT
GACAATGCATGGCCAAACTTTTGATCTGTGACGTTCGCAAAACGCACTAC
TTTGCTTTCTGTATGCAATGGGAATGAGGCGTAGCGACA
>56
TGTAATCAGACAGCGTTCTACCGTCTTCTAGCTGCTTACCGGCAAAGATC
AATCTTTGTTGATCTGGAGGGATACCTTCCTTGTCTTGAATTTTCGACTT
AACGTTGTCGATGGTATCGGAAGATTCAACTTCCAATGTTATGGTTTTAC
CGGTCAAAGTCTTGACGAAAATCTGCATAATCTATTAGTTAAAGTAAAGT
GGGAGGGAGAGTTCGAGAGTTCTTGTCGTATTGTAGTAGATAGAAGATAT
ACTTATCCTTATCCGTACAGTTCTTGCTCTTTCTGAAGTAGCACTTTCGG
AAGAAGAAAGATAAGCAGGCGAATTCAAAGGTGGCAAAACCCGGAGCCTC
TCTATATATACCCCCAAAAGGAGGAACCGCCCTCAAATGACACTGAATTC
TAAAAACAACTGATAAGTGGCATCGCCCCTGAAAAAAGAAACGAAGTGGG
GTAACCACCGTGTGTGGCCGGATGTACGGCTGTGTGATGCTCCACTGGGC
GGCTATTTTTTTTTTTGGTACCGAAATTGGTTTATCCAGGATTATTCTAG
AACGTTCTAGAAACAATACTGACCACAAAGACTTTTCGGAATAGAATATT
GTCAAACAAGAACTTTTTCACTTTCTTTTCATAAAACGTCACTTTCATCA
CTTTTGCAGGATTTCCCACAGTTCGTTTAAAGGGACATTTCCTATCATGG
GTTGCCCTGCGCGAATAAGATGATTGGTCAAGGAAGACTCTAAAATCATC
TGAACGGGTTATTTGAAGACTTGGGTCTAAATGAGAGCTTGCTTATTCCA
CCCGCCACGCCGGGCGTATCTTCACTGTCTTCTTCGGCCAGGGGATCCAA
AGAGAATCGGGCATATTCGTGCGTATTCCTTGTCCGTTGTCTCTGGAAAT
CTAAGCTAGTGCTGGTGGTGGGAGGCTTTGCTTTCTTTTCTAAGCTTTGT
CGCGTGAGCTCGCTTCTCATTTCCTCCAGCTTCAAATGGCTATTGTCCGT
GGACTTCCTGCCCGGAGTCGATATGCTTGAGCGGAATTGTATTACATCCT
TGCGTTGTTTTTCTAGTAACCCGTCGTCTT
>57
CAAAATACAGATATTGCGCTGTGTATTATCATTACGGAAAGTGTGATATA
AACAATGCTGTGTTGTATTCGGTCTTTTTTTTCCGCCTGGAGATTGTCGT
TTTTGTTTTTTTTTCTCGTGTAGCTGCAGTTATCATCGTTTTGCATGTCT
GTTCTGTCGGTGAAGCCGATCTCATGGCACTTCGCTTTGATACCGTAAAG
AATCTTCTTCATTAATACGGCACTGCAAGGCGATATCTATCTCTGGGGTT
AGGACTGATAAATAGGTACTTATCAGTTATCACTAGAGACGAACTGTTTA
CGTTTTGAAGCTCGACAGCAGGGGTTCTTAACGGGCGTCGGCCTAGACCT
CACCTTGCGAGAAATTTTTAGTTCATATCCAGGGGATGGTGAATGGTTGG
ATCTGACGAAGCCACGGTAAGGGCAAGGCTTTGCGCATGCACTGGCCACT
ATGCATACCATATATAAATAGATAATCAAGCGTATAGAAAACGACATGCT
AAGTTATTTTACTCAGTGTTAGGTCTCTTAGTATTTGCGTCTGAAAAGAT
CTTAGCTCTGTCTTTGACTCTATCACTTATTTTT
>58
AATACACCTACGACGTTAAAACAGATCGTGCTGTCGTCTCAGCGGCAGTA
AAAGTACTGTAGTAGTTACGGTGCACGCAGATGCAATGCTAATTAAATAA
TCATGCTCCCATTTTTAAGAAGCAGAAAAAGGCCGCAGTAATTTGAGCCG
TGAAAAGATTTCGGAGGGTTGATTCTTAACATTTTCCAAAAAAATGTCCT
TTGGTCTGTTTGCTTGGGTCTGAAAAGAAGGACTGCAGCGCCACCTCCAC
TGGTTAAGGACAAAATCCATACTTATTCCATCTTTCTCGGGACATATTTT
CCTGAGACAAAAGACCGTAGAACTTCAAAGACTCGTTCCCAGAAAGGGAT
TTAGAGTTAATTTTTGCTCGGCATCAAGCCGGAAAAATTCAGGCGCCGCT
TAGTAATTAATTGCAAGTAAAGAAGTACCGGATTTATTAGACATCGTCTT
AGCAAGCAAATTCCTGAAAGCTAAAACGCAAATAATTAACTAAAAATAGT
TGCTAAAGAGCACCTTTTATGCGGTACATAAAAGTTTTTAGTGCCGTAGA
TATATGTAGATATAGGTGGGCGTAGGATCAGAAGGAGCCGGAGAGAAGAT
TTACCAACACTGATATTCCTCGAAATACTCTATAATTCTCTCTGGGTAAC
CGAGGAGTTTTTGAGAAACGGTGTTTCTAACATCGTCCACCAGAACAGGA
GGGCCGCAGCACACGACCGCT
>59
GAATTAAGCAACATACTCCTCCTAATTAACCTCTAAAACCGGAAGATTAT
ATATATAACAAAAGATTTTCCTTGTCCTCCCTTTTTGTGCTTGCCTTTCC
GAAAACCGGCAGCGATTGGAGGTTTGATGGTTAAAGTCGCCTGCGGAGAA
CAACTGAAGGGTTCAAATTTTTCTCGTATGCACTAATTTCTCTATTGATT
GGTCAGGACCTTTGCCGATTTCGGCGCCGAAATGCTCGAAAAACAAAGGG
TATTGCCCGGCCCCGCGGACCTCCCTTTTGCGGCTCTCGGCCATTTTTTA
GGTAATTTGACACCGTGCCCAAATGGCTTGGCACAATCGAGAATCAGGCA
CCCGCGTGTGACCGGCGTCATTCATTAAAGCCAGATAAGACAAAGTAAAA
TACAATGGATTATGATTAATACAATGATATACAAAAAGAGAGAAAATAAA
CGAAGGCTACGTCTGCGTAATTGACGATGGGAAACTGGTATTTTTATATA
AGCATATGTAAAGTGCGAAGTATATCAGTACGGAATGCCATTTGTGAGCC
TTTGGAAT
>60
TCTTTTTCCTTCTTTTCTTTGTTTTTTTTTTTCTCCTATTCATCAAGCTT
CATACATCCAATATACATTCTCAAGTGTGCTAATGGTACATTTGGGAAAT
TATCTTCCTCTCTCCACAATTTTTAGAAGGAAAAAAGAAATGCAGTTCAG
GGTAACAGAGTGCGCAATTACCGTAGATAGCGATCGGATGTTTATCTTTA
GCCCTCTTTTTCTAGCTCAAACCCCGGCACGAATTTTTTAGGTCTTGCTG
CTCTGCCCTCGGGCACTTTTCTTCGAGAAGTTCTGGGGCGGTCTGATCGG
GAAAAAACGTTCCCTTTTCGGACGTATCGCAGGCAATGTGCAAAAGCTTA
TTATATACGAGAAAAGAAACGCGAAGGAACGAAAGAAGATGAAAAAAATG
CAG
>61
CAGTAGCTCCTAAACGATTATTCCAAATGAAGAAAAACGTTTGGCCAGTA
ACCTGCATAAAACTGAATAACTATAATGATACTCCGACTAATAATATATC
CCAATGCCCCATCTCATCTGTGTAGATCAATTTTTATGGCTCGATCCAGG
TACCTTGATAAGCAGCTGTCGCGCAAAGGGGTTACCGCAAAATGGATAGA
TGGACCGGGGGCACACCGGGGTAGGGGGTCCGGAGGGTTAACTGTCAACT
CCACCCATACAAGACCGCGCAGAAATCGTCGCAGGACCCCGCCGAACGGC
GAAAGCAAATATGCAGCCGTAAAGACCTAACAATAAACCTAATGTAGTCA
TAGGGCTAATTGATTTTAAATATATGACCTAGCTGACTATTCAAGTTTGC
CCTAATTGATGAGTTTTTGAAAAAAAAAACAACTTAGGTTTCGCTATCCA
AGCTTATGCTATGGGAAGCGTTGGAAAACTTGCATATAGTATGAACAAGA
GCGAGATATAAAACTATAACGGTAGATGGAAAGTAAAGAGTAGACAAGCT
CGGAAACATGGAAAATAGCATGATGTTTATATCGCGTTCCTTGCGGAGAC
CCGTTACTGCTTTGAACTGCAATTTACAAAGCGTTAGAACAGTCATATAC
CTTCA
>62
TTCCCATTTTTTTCCTCCAAGACTCCTCTTATGTGGTTGTTATGTATAGC
CCATAGTTACTAAATAAAACACTAATTAATGATTAATAATCCCTCTCTAA
TAAGAAATAGATAAAAGCTATTGTTCTTCTCATCGCCGGTTCTCGGCGTT
GTCCGTACCCTTGGCCGAAACTCGGGCGGGGGCTTATTAGTCATACCCTC
AGATTTCATTGGTCAGATAACAGTCACCCGGTAAATGCCCGTTTAATGAC
TTCTTTATTTTGGATTAAAATTGACAGGGAATTTCAACGGAATAAAGGAA
AGAGATTGAGATGCTTT
>63
GGCGATCACTTCATTTTCTTGAGAGGGGTACTCAGTAGCCGCCAAGCACG
AAATGTCCGTTATTAAAAATTGGGGAGTGAATCTTAAAAGCCCGAAAAGG
AAATTCAAAATCTGTCTATTTATAGGCCGTCGCGCTCTACGAAAACGCGA
AATTATTCAAACGGAAAACGGAAAAAAATCTAAAAAAAGAAATTAATTGA
GAGATCTCACGGAAATGCCGCGAGGAATGTTTCTCGAGGCTGAGCGGCGT
GGTCTGTGCAAAAAAATGGCAATTTTTTTGTAGGAGTTTGCATTGGGCCA
TTCAGAAGGAGCACCGTTAGATGGGATGGTAAATGAATTTGCTGTTTCAG
ATTTGAATCAATCTTTACCCGTTATTTTTGCCGTTTTGCTTTCAT
>64
AAATGAAGGGAGAAATAATTATGGTAAATCATGCGGCGGTCCTTTTGGTG
ATGCAGTATCCATAGTCACTACATAACAATCTTAGTCACCTTGTATTGAT
TCACCACATAATCCTGCAGAGCCCGCTATGTCCTTAATCTGCGCGATAAC
TCTCCTACCCCTGAATTTTGAGAGCGCCATAGCAAACCGATAAAGCTGGC
ACAATTAAAGGTATCGGTGTTGTCAGAATTAGGTGCCTCCTGCTTTTTTT
TTTTTCCTGCTCTTATATCCGTTATATCCGAATGATTTTTATCGCTTGTT
TAAAAAATACTTTCCCGATATATATATATAGTCTCCCTTTAAATTTGTTT
CCGGTAAGTTTTTAACACCAATAAATGAAAAGAAATGACTACGGTGATGA
ATATGAGCCGCGCATTGAATCAGGTTATGTAAGTATCAGAACCCCTAATT
ATGATGTCACTCTTACCCTTCGATGGCTAAGCGGCGACTGGGATGCCGGG
AAAAGCTCTACAAATCTACTAAAAAAGTCAAATATACAGCTGTAAACTTC
TT
>65
TCAACGAATATCAAGTTTTTGGGTGCATTGAGCGTGGAATGTATAGATAC
TACAGTTTAAAAGCATAGATATTTTTCTCTTTACTTCCTTACCCTTCCTC
CGCTCTCGTCTTGTGTCTTGTATATGATTTCTATATATGGTAAAATATTG
CATACATCGTCTACCATTTAGCCAGACTTTTCGGAAACGAATTTAATGAT
TGCAGCAAATTCCCTTCCCCTATCAACTGATTGAAGAATGCCTCGAAACG
CAATGTGATTTTTAAGTTTTCCATTTTTTTTTTTTTCATAAGGGAAGCCT
CTCTCCTCCGAAAAAGGTAAACATTGCGAAAAATGATCCAAAAGAGAGAA
TAAAAAAACAATTAGAAAATGATTTACTCATCCGCTTACTAGAGAGGCCA
AACCGGATAGTCCTGACGCTAATAAGAGTAGGATTAAGTT
>66
TTGTATTATCTTCTCCTACAAAGTCTAGTATGGGGATGATTAAAGCGCAC
ACTTTCCTTCGAGACTTCTGATGATGACATTTCCACATTTCCATATATTT
CTTTTTTTGTATCGCGAAAAAATGGGAAGAATGGCGTTTCTAACCACTAA
AAAAGAGGAATTTTTGCCTAATTTGGGAATTTGTCAATAAAAATGTAAAA
CATATGAGATGTATTATTGCCTGCGGAAGATTCTTAAAAACATGACAAAA
TCCAAATTGAAAATGACCTGAAGGTCTCGACTTTTCGGATTTTCATTGTT
GCTATGTAAATCTATAGTTAATTATATCCAATTCTGGTAACCAAACCTGT
GCTTCGTACACCAATCGGGACCATGCTCATAGTATTCTTCTCTTGTGACC
CTCGCTTTTCGGTAGGAATCTGTCTTTGCAAACTGTGACA
>67
CAAAAATACAGATATACAAAAGGTGAAAAAAGATATAGTAGTTCCTCGAC
GTATGCCTACGGGGAAAACAATATAGATGGAATTCTATAACACCGACAGT
GATGTTTCTCCTGAAATTTGTGCCAAATAGCGCCGCGGAAAGTCGGCACA
TTTTGCAACATGGACTTCGGAGGTCTGATATCATCCCGTAACCTTCTCGT
AATGCATCAGATTCTGGTCATGCTTGTTCAATATACATCCTACGTGCACA
ACGAACAATAGCTTTCTCGGTATCTTATTCGATTATCCCCGAAGTTTCTT
GAAACGGCAATATCCTTTTACCCTATCCCGGGCGAAGAACCCCGTCACAG
TGCATTACTTTATTCCCACTATAGGGATAACAGGGGCGATTGTGTACGAA
TAACTAGATTGTATTTAGATAACTAAGAT
>68
ACAAAGAGACCAGAAAGCCTAGAATTAAATGCCAGAAAAATGGAAATTTA
TTCTAGACAAAAATTGTTCGGCACCTCTACAGACGTTTAACGAACCTGGT
CCGGCCTTTGAGGCGATCAAAAAAAGGCCCATTTTTGTGTTCCGCGTAAT
TGGTTTGCGCCTTTCCATGGAGCTTGGTGGGCGACATTCTCAAACTGGTT
TCCTGATACATCATGCACGCCCGTAAAGGGTTTAAGTATTGATTGCTAGC
CTGAATGTTTCATATGCATACCGTGTCTATGCAACGAATATATTTCAGAA
AAAAGCACGAAAGCCAAATTTTTGATGTTAAGAGGTGTTTTTGCCCGTAA
ACGGAGAAGACGTGGTAGGACTCGCAAATGTCGCGTTTAGCGTTGAAGAA
CATGGAAGTATTGAACGTTTGGGGCTTGACGGCTCGACTTTTT
>69
TATCGAGTCAAAAACACCATTAGCAATTAATGCTCTTCTAGAGCCAGGTA
TCCAAGAGTGTCTGACACCAATACCTACCGCGACTGCTATGGGTGACGTT
AAAGTGAAGGCTAATCCCATTAACCAAGGCATGTACTTCTTACTTTCTGG
CCAATTCGTTTCGGCAACTCTTGTGCCTAGACCCAAACCTTCGAACATTT
GGTGGAAAGTTAAAACGATAAATAAGGTTTCGAATTCTTCACCCGCGACA
GATAGCGAAAGACCCACAAATACAGAGTGAAAGATGATGCCAAATTCTAG
AATAAAAACAGCTAGTATCTGATTGAGATACTGCTCTTTATCTTCCTCCT
CGATACGTGTGGCCAACTGGGAGACATCTTGATGGTCATTTT
>70
TTTGTTTCACTGCTTGTTTGCAATTGGTTGTTGTTCCTAACGCGTTTTGT
CATTTTTCGATGAAGGTCGAACGGAAAGAACTAAAAAAGACTAGGGGAAT
GGAATGCGGAATAGCAGTGCATATTTCAGGATGAATGGAAAAACACATCT
GCAGCAACAATGAAAAACCTTAGTGGATTTAAACTTCTCACAGGAAATAT
CGATCAAAGCAATGGGCTAGCCAAATAAAAAAAAAACTGTAGGCACAAAA
AGCAGCATACGTCATTCGCAAAAAAGAAGGTCCTACCCGGATTCGAACCG
GGGTTGTCCGGATCAAAACCGAAAGTGATAACCACTACACTATAGGACCG
GAACTTCTTGATGATACGAACGATTAAAATTGTTGACGTTCTCTTCTTTT
TTTCATATTTGAGTAG
>71
AGGGGAAATAAACTATTAGATAGTACGAGTTCGTTAAGTTAAAAAAAAGG
CTATAAAAGTCGAAGAACGAATGATTACGACCAACATCTATTGTTCAAAC
TTGCCTTCGTTGAGTTTATCGAACGCGCTCGTTTAAATTTTTCCGACAAG
AACGAGGAACGAGTCACCAATTACGTTTTCGGCTCTGTCGGTTGCAGGAT
CTGTAAAAGCGATATAGATACACACGTCAGCATGAAGCTCTTATGATTTG
GCGAGTAGTGTTAGTACGTTAAATGCTACGACTCGGCATATACTGTGCTC
GTTTTTATCAGTTTCATCCGAGGATTGTAGCCTTTTTTTTTCATTTGTTG
ATGTTTCTCTAGTATTTTCCGTCTTGTAGTGGTTTCGGGTATGTTGAACA
TAAACATTAAAAAAGACGATTAAATAAACTTGAGTTTGTACAAAGGAAAG
CTGTAGTCATAGAGTATTTAGAAAAAAAAGCAGCCACAGTTTACATGAAG
ATGTGACCAATGAGGAGGCATCGGTTTGCCTTTGAATCTCAATCGC
>72
AAGAGTTAATATACTTGAACCACTTAAATAACAATCTGTTGGTAAAGCTT
TCTTCCTATTGATTATGGGTTCGAATAGTACCAGATGTTTTGCCAATCCT
AAATCGGTAGGAAAGTGGCTTGTCGTCGTCAGGCTTATTATCAACTCTTA
TGCACAAGAAAGGTACTCATCTTCTATAAACTACATAAGACCTGAATCTA
ATCAAAGGGAGAAAGCGCAGAACATCAGATTTAAAGCGGTTTTGCTTGAT
ACACTCAGCCTTGTCTCTTTGTAAGGATTTTGGGGTACCTATGAATAATA
CATCTAGTAGTGTTAGTAAACCAACGTATGGGATTTTGGGATACATAGTT
TTCCAGTGTTTCTTATCCGTGATAGTTTAATGGTCAGAATGGGCGCTTGT
CGCGTGCCAGATCGGGGTTCAATTCCCCGTCGCGGAGAATTTTTTTAAGC
TTCTATTAAAGAAGCTTTTTTTCACTTATATCTGATGGATGATGAATAGC
TAGTT
>73
AGTTTACAACAACAAAGCAGCGGCACCAGCCAACAAAGCACCAGCAGCTG
GCAAAGCCTTAGCAGCAGCACCAGTGTAAGAGGTGACAGAGTGAGTTGGA
GCAGCAGAGGTGGTGTTCTTTGGAGCTTCAGTAGAGGTAACTGGAGCAGC
AGTAGAAGTACCGTTCTTTGGGGCTTCAGTGGTCAATGGGCACCAGGTGG
TGTATTGAGTGATAACGTCATCGACGGTGACGGTAGCGGTGGAAACCAAA
GCTGGGGAGACAGTTTCAGAACAGACGTGGTCTTCACAAGAAGTGATGGT
GACCAAAGTGGTAGATTCTTGGCTGACAGTAGCAGTGGTAACGTTAGCAG
CGGCAGAAGCGACAGCGGCGACAGCGGCGATAGAAGCGACAGTAGAAAAT
TGCATTATTGATATAGTGTTTAAGCGAATGACAGAAGATTAATTTCTTGG
TATGTTAGGAAAGAATAAAGGAGAATAAGAATAATTAGAACAATGTAGGA
TGGAAAGAAAGATTATCAAGCATGCCGACTTTATATACTTGAACGGAGGC
AAAGGATGCAAAATTTTCTCACATTTCTTTCTGCCGTTATGTTGGAAGTA
AGACTCCCATTATCGCAATACTGCAACACGAATATGCAAAATTTGCTGAG
TTATCGCAGATAGTTGTTGCAAAGATAGCGGCGTAGGTGGCCGCGAAATG
GGGAATTCCAAAACAAACGGTTTTTTTACTCCTGAGAAATACTTGTACGG
GATAATCCAGGGCCTACCACCCACGCTTCGAGGATTGGCTTTTATTTTTT
TTTTTTTGGTGGCGTTTTATTTCTTTCCCGCTTTCTGGGACTTGTGCGGA
GTTTTGAGAGGGGCGCGCGGCAAAGGATTCCCAAAACGGAAATCAGACGC
CAATAGCCAGCACTCAAAGCAGTTCTGGACCCATTCCGATTTTCCCATTT
GGTTCTTGCGCGTGCTGATTCCGACACGCGCGTCTATAAATAGCATGAAG
TATCCGCACACCGCAGCGTTAGTGAGGTGAGGGTGGCAGCAAGCTAATTC
CCGCATCTGGAATCTGAACTGCCCCTTTTGGACTAACCGTGTGGTTCATG
GGTGGGCGAAGTGCGCAACCTCGAAGGTTTTCTTTTGCGTGTCGGATTTT
ACATCCGGCGGTAGCGCATGATGCCATGGCTGGCTCCAGATACATCCTCA
GGGCACCAGCATCTATAATTAGATTGGCGCAACATGGCTGGCTGCACTGC
TGTCTTCACTTCTTTCTTTTTCCGGCAATGAATGATGTATGTTTTGTGGC
AAAAGGGTCCGCATTGTACCTGTTTACAGTTGAGATTATCGTTTTTGGTA
GCCCTTCATTACGGCATAACGTATTAAGTTTCTTTTATTTTGCTTTGCCC
TGGTTTAAAAGACAATGTCGATTAAAAGTTAATTTTAATCGATTGAAGGA
AATAAGAGGAATAGCGCAAGTTGTTAGGAAAGCGTTCTTTATCTCCAAGA
CTTTGCCCTGTATATAATTAAACACCTCAAAGCGCTTCGTCATGGATGGA
GATTATTCGGCATTTTGACATACAGGAGTGCCACATGCGAAAGCGGAGTG
GGCGTATTCTCTGGTTACCCTACATGGTCTGGCGGCGTTATTATACGGGA
GGATCTTCGAAGGGAAGGAAGGAAAAAAAAAAAGAAAAGGCCAACGAAAA
GCAAATATTATCTATCGTCGAAA
>74
TAAAAATAGGGATTTGAGGATTCCTATATCCTCGAGGAGAACTTCTAGTA
TATTAACTATACAGAATATCATAGCCTTGATCAACAATAAAATCCCAGCA
ATTATCAAATTATCCATCCATTTCTCAGTGACATTCTCACTAGATGAGCG
TTTTTGAGAATAATGCTAACATTTGGTAAGGTATGAAATAAAATGCGATA
TCCTCCGTAGTTGTCGTCCGATATAGTGTAACGGCTATCACATCACGCTT
TCACCGTGGAGACCGGGGTTCGACTCCCCGTATCGGAGATATATTTAATA
TTTTTTTTGATTTGACTTCAAATGAGAACTATTTTTTTAAAGCATCGTGT
GGTAAA
>75
TCGCATGATAATTTTATCGCCTATATATTCTTTACATTTTTCACATTCAT
TCCTTTTTACCGCTCTGACCAATCAACGTTGTGCCGATGCTCGCAAAAGA
TATTTTTGTCCGGGCAACGGCTTTTGCGACAGACGGTAATAATAGTAGGG
CCCCTTGCCCCCTTCTCATCTTATTCTTCTCCTTTCTTCTTCATTCCATT
GTTTTTTAGTGGTCCTAACTCAATACCCTTTCAAGATTATCGTTGCTCTC
CATGGTGTCCATCACGGTCACATGGTGCAGTACTTCCTTCCTACTGCTCT
CTGCGATGGAGCCATCGCACATAATCATCTCATTCAAGATATCGTAGACC
TTACTGAAGTTAAATATAATGTCTAGCTCACAAACATTGCCGAAATATGT
GTCCATTGTTTCGACAAACCGATGGATAATTTCCAAGGTCAGCAGTTCAT
TGTCAACATCGGGCGTCATCCCAACAATAAAATATAGACTAGCATATCGC
TTGTATACTACTTTGTGGTCATTATACTCGA
>76
CGCATGTTAGTATATACGATTCGTTGGAAAGGGGCCGTCCACCAAACGTG
ACTTGACGAGTTGACAAATTGACCTCAATATGGCTCAGTCAGTAATTTTT
AGTTCCGCTTTATTCCCGCCATCTTTCAGGCCACGAGGGTAGCTCATAAC
GCCGCGCTAATGCCGCTGCGTCACAGCAACCAGTAGCTCAGCCAAAACCG
AAAGAGAAATCGTAGCTGTCCCGATGAGGACTTATACACTTGTCACCATC
TAAATAAATTATTTATTCGCGTTTCGGTTCTTGTTTTCGATTTAATTAGA
TTGT
>77
GTCTGAGTGACTGTAATAATAAATTTTACAAGCCACTTCTCATGACATAT
ATTGGTAAGTAACTTCATCAATACTAATTAGTCTTTGCCGGTTACCCATC
TGGCCCCTGACTTGCGATGCTTAGGAAGTTCCATACTCGCGGCTCTTCCC
AACAGTAGCACATCCGTGAAACTTCTGGCGCTATTCATTATGCAGTACCA
GGACAAGAAGTTAAAAAAAAAGCTCTGTTACAAGTTCAATGGTGGTGCAA
GGATTGAAGTTATTATCCAGGAGGCACGGATGCAAAAGATAGAAGACAAA
TTAATTTCCTTAAAATTCAAAATGCTCATTATTGTCACGCTGTATGAGCA
TTTGGTGAAGATTTCACTGGGAAATGTTGCAATAATTTGATAATCGTTCG
TATTGGATGAAACTGTAACATCATCTGTTTATTAAGTATCCGTGTTATTA
GTATATCATCACATACGGTGTAAGAAGATAACATA
>78
CATATCACCCATATTTCCTTTTCACGTAAGAAAACTTAAGTACTAGTGCG
GTGCCTGCGTTAGTGCTTGTCTTTAGGTCAAACAGGTCATCTTGACCAAC
TTAGCTTATAATAAGAATGATAATCGATTACTCTAAATAGCATTCTTTCA
TTTGCGGCATCTTATAACCCACACACCGCATTTAGGACCCGTTTTTTTTC
TTTTTTTTTTTGTTGAAAAAATTCAACAGTTCCTATTTTTTTCTTTTCAT
TCTTTTTTTTTGCCTTGCCTTCGTTTCGAGAATTCTTTTTCTTTTTCTTT
AGGTAAGGGACCTTCTCAGCTGAGGCACGGTGGGGTTTGTAATAGTGTCC
ATTCTGGCACAAATGCATAAGTGATGCTAAAATAGTGATACGTCTAAACA
AAACGGTTTGGATGCCTAGCAAATAGTAAAAAGACTTGAATATATCACTT
TTATCACTATGTAAAAAAACTGAGTTATATTATTAAGTTTTTTTTGAAAT
GTTCCCGTTTGACG
>79
TATCATCATCAATAATTTCTTTTCTGAAAGTACGACATCAAAGTCGCCGA
GTTTTGTCTTCGGAATAAATACTAGGTCAGATGAATAAAGAGCAGGAATT
TACTATCTCTGATAATTTATTATGCTCCTCTAGTGCAATGGTTAGCATGC
ATTCTTCCGGTGGCTGTGATCCGGGTTCGAGTCCCGGGAGGAGCTTTTAA
TTTTTTAGCGCACTATTCTAATTTTTAAGGAAAAAGCATATTTCCGAGTC
AGTGCATAGAAAGAACGGAGGCTACGATGCCAGCACAGTGTCTATAAAGT
CAAGAAATACATTCAAACTCTTCGCGTAAGGGCTGTCAATTTTTCATTTC
CCTCAAAGTTAATGCGCAAGAGTTAGGATGATCTTGATTATTAGTTATTT
GTTTGTTCCATCAATTATGCCGACGTCCATGAATGCTATTGAAGTATCGA
TTACTTATGCTATTCTATTGTATTTGAGCCGGCGGCTAGTAAACAAGACA
GCATACCTTTCCAACATCCGTACATATTGATTATTGTATCTATGATTTTC
ATGTAATGTATGGGTTAACTAATCCTTTCTCTTCTTTTTTTTTTTTCTGA
AAATCAGTAGCTAGAGGAACCTGTTCGTGAAAGATATGGAATATTCCGTC
TAGGGAAGAGCCGAGAGCTGAGAGCAGTATCCATCGGATGGAATCTTGCC
TGGATGCGTAACGACGACAGCTTGTCTAGAAGGCGAAGTACAAGATACTA
AGAAGACTATAACAACAGAAGACAATTTTGTAGTGCGATTCTATATTATT
GACGTAACCAACAAAAAAGTATCAGAATGGCT
>80
TGATCGAATAATAATTGGAGGTTGAAGAAGTTGCAAAAAATATTTACTTG
GACGAGTCCGGAATCGAACCGGAGACCTCTCCCATGCTAAGGGAGCGCGC
TACCGACTACGCCACACGCCCAATTTTCTTGTTGTCTGTTGTGTTTCAGA
ATGGGGTACGTCAGTATGATAATAATCATCCTAAACGTTCTTAAATTACA
TATGAAACAACCTTATAGCAAAACGAACAGAATG
>81
CATTGTTGGCTGAGAAATTAAGCTCAGCATTTTAGCTTTCCTCACTACGT
GTTGAGGAATTTAATACGTAAATATAGTCTTAGTAAAGCCGTGCATTTTA
CTTCTTAACTCCTTTGGACGGGATCAAGTTTAAGGAGAATAAAACCCTGA
TTCGCACCTTCAACGCGGCTCTAACATGGTACTATCAGACTCTCACATCC
AGATTGGAGTACCCTTATCCGAAGTAACGATTTTTTATTACGGTTTAAGA
TAATAAGGGACGCGTATGATAACTAAAAATCGTCAGTTGAAGGGCGCTGG
CCATAGGTATCCCTTAATTTTGACGTCGAATTTCATAGAAGCAAACCTAT
ATATTTTCAGTCCCCAGTG
>82
TCCTTATATATGATGAAGAAAAATTTTCTTCGGATGTTGGAAGAGAATGT
TCGATAATAATCGTTACATACGATTGTCACTGTAGCATTTGTTAGGGTTC
AATCATATATGATAAGCCCAATTTGAGACCAAAATCGTACATTGGACAGG
ACCGCATCACGTCAGAATAGTTTTTGTGCATCTATGTAATATAATACGGT
TGAATTATCCTTTTATAATGATG
>83
CACTGTGCGGATGCTGTTGCTGGACAAACACTATAGGATGGGCACCATTA
CTTGCACTTCTACCGGTTATAGGACCCTTATTGATGTATTGGGTGCATGA
TAAGTTGATTGAATTGGCAGATGACAGGTATAAATTGCCTGCGGAAATCA
AGGTGAAGATGCATGGTAATATCGTTATCGATTTACTTATTAGTTTAGTT
CCTATTCTGGGAAGTGTTTTTGCATGGTTGCACGCATGTTCCACGAGAAA
CGCAGCTATAGTTTACAATTTTGTTGGAAAAAGGGCATTGGAAAGAAAGC
AAGCGGAGCTCATGCATCAAAAAGAAGAAAATGAGAAACATTCCAATGCC
AATACTGCACCTCCAGTAGTTGGTGGCAACAAAAATGTGAATGGAAACAG
AAATAATAGTAAAATGTATAACAGACCGCCTGTGACAGCTCCACCTGCAC
CAGCATACACGCGCAGTACTAACGGTCGCCCCCAAAGAGGTTACAGGTGA
ACAAACCGGCCACGGTAAGGCTACATTCTTATCAACAAATATGGGCAATC
AAAAACTTATAATGTAAATTTTATTTTTTATCGTAAACATGTATTTAAGA
AGTAATATAAAGG
>84
AGTAAATGTTTAGCTTGTACTTAACTTTCAAAGACAGTTTTTTTGATAAA
CATCAGTACATTTAATAATACATCCATACATTTATGTTAATTTGTTTTTC
CTTTCCACCTCAGTGCGCTTCTCTTTTGAAAAAATCCTCAACAGGCCACG
CGAACAAATCTTACCGAGAATTTCCTAAAATGTTTCAAACTATCATTTAG
CTGCATACAATATGTACATTATTAATTGAGATTAACAACTTTACCTGTAC
TTTACCGTTATCAAATTATAAACCACCAAAACAACAGATTAAGA
>85
ATTAATGTTAGTATTTATTCTAAGTAGTTTCTTTCTTTTTATTTAATTTG
AGTGATAACAATAACAACAATAATGACTAAAAGGTGAAAATTGAAAACAT
TACCTTCATTTTTTTACGGCCGGAGAGGGGTAGGTACACTTAACCCCGAG
CGCTTTTAGTGCCAAAAAGAGTTAATGTGCGTAGTCGGATTTTAAACGAC
CATGCATGTACAGCCCCCTAGTGATTTATACTGATGCCTCATCAAGAAAT
TTTTTCATCCAGGGTCCCTGCTCGGCGAACCTTTCCGCAAGAGTCACAAA
AATCAATCTTATAACCAGGCACCAGTAGTACTGCCAAGCTTGGACTACAT
AGCCAACGTAAAGACAAGGAGTCTGATTTAGTATTTCTTTTTTGCCAGCC
AGTATTTTCTGCGCAGGATAGATTATTTTAAGAGCCGAGAATTCCTTATG
CGGGCCCGGTCACAACGGATTATAGGTTCCGCCAGACCCCGTTGCTTTGG
TTCCATGGAGCAGGAGCAGGATTTTCCGTGGAAAGAGAAGCACCGAGCGA
AAAGCGGATACGGAAGGCGGATGCGGAAACGGATGCGGACGCGGAAGGAA
GGAAGGAAGCAAACCCTTCCGTCTATGTCGCTATGAAGCCGTCTCACAGT
AGAGCCATTCGAGATTTCCGTCCGTCGGTACACAGAAATCTTCGTATCGG
GAGTTTTACTTTAAAAGGAAACGATCGTAGGAATTCCCTAAAGAAAAAGG
AAGAAAAATTTAACGT
>86
TCCCGTAAACTACATAGCACATTGTCTTTGCCATATTTTAAAAATTTTGT
GGCGCCGTCAAAATAAAAAAAAAATACTGAAGGATGCGAGGTTCGAACTC
GCGCGGACAACCGTCCAACAGATCTTAAGTCTGCCGCCTTAGACCACTCG
GCCAACCCTCCGTCGATAATACAACAACAAGGAAATACAGGATACGAACA
CCATCCAGTTTAACTTGATTAATCTTTA
>87
ATATCATGTGTCGGTACTTGGCAGTTGTACCTAAGGGACTCTGGTGACCA
TATTTTGCACGAATTGAAGCTGGCCCAAGAAAACGGCTATAAGCTTGGGC
TGAAACTGGTTCGTGGTGCTTATATTCATTCTGAAAAAAACCGTAACCAA
ATTATCTTTGGCGATAAAACGGGCACTGACGAAAATTACGATCGTATCAT
CACTCAAGTTGTCAATGATTTAATCATCAATGGCGAGGATTCTTATTTTG
GTCACTTGGTTGTCGCCTCTCATAATTACCAATCCCAAATGCTCGTTACT
AATTTGCTAAAATCTACCCAAGACAACTCTTATGCCAAATCGAACATTGT
GTTGGGGCAATTACTAGGTATGGCAGATAATGTTACCTATGACCTAATTA
CCAACCATGGCGCTAAAAACATAATCAAGTATGT
>88
AAAACTTTAACTAATAATTAGAGATTAAATCGCTTATTGCTTAGCGTTGG
TAGCAGCAGTCAACTTAGCTTGTTCAACCAAGTTTTGTGGAGCATCGAAG
ACTGGCAACATGATTTCAATCATTCTGATCTTAGAGTTGTCGTTGAAAGA
CTTGTCTTGGGTCAACTTGTCCCATTCACCGGTGGTAGCGACTCTGTGGG
TTTCATAGTCCTTAGCACCGAAAGTTGGCAACAAGGATAGGTGGTCCCAA
CCTTGAATTTCGTTGTATTGAGCCTTTGGACCGTGAATCAACTTTTCAAT
GGTGTAACCATCGTTGTTCAAGACGAACAAGTATGGCTTCAAGCCCCATC
TGATCATGGTGGAGATTTCTTGAACAGTCAATTGCAAAGAACCGTCACCA
ATGAATAAGATAACTCTCTTCTTTGGATCAATTTCTTCAGCAGCGAAAGC
AGCACCCAAGGTAGCACCAGTGGTGAAACCAATGGAACCCCATAAGACTT
GAGAGATACCGTAGGTGTTGTTTGGGAAAGTGGTTTGGTTGATACCGAAA
GCGGAGGTACCGGTTTCAGCAATGACAACATCACCTTCTTGCAAGAAGTT
ACCCAATTGGTTCCACATCCATTCTTGCTTCAATGGGGTAGAAGCTGGGA
CAGCAGCGTTAGCTGGAGTTCTAGCTGGGACAGCAACTGGCTTGTAACCC
TTAGCGGCGTCAGCAATAGTGGTCAACAACTTTTGCAAAACGAATTTCAT
TTGGACACCTGGGAAAGTGGCGTTTCTGATCTTCATGTGGTCGGAGTGGA
ATTCGACAATGTTCTTGGTCTTGTAAGAGTAAGAGAAAGAACCGGTGTTG
AAATCAGACAACAAAGCACCGACAGACAAAATCAAGTCAGCAGATTCAAC
GGCTTCCTTAACTTCTGGCTTGGACAAGGTACCGACGTAAACACCACCGT
ATCTTGGGTGTTGTTCGTCAATGGAACCCTTACCCATTGGGGTGACGAAA
GCTGGGAATTGAGTCAAGTCAATCAACTTCTTAGTTTCAGCCTTGACGTC
GTGTCTGGAACAACAAGCATCAGCCAAGATAACTGGGTTCTTAGCATCCT
TGACCAAAGCCAAGATGGTGTCAATGACTTCCTTTTCGGATTCAGCATCG
TTTGGCTTCAAAGACATGTCAATTGGAGTTTGCAACAACTTAGCTGGGAC
GTTCAAGTCGACCAAGTTAGCTGGCAAACCTAAGTAGACTGGTCTTTGGG
TGACGTAAGTGGTTCTGATACATCTGTCAATTTCAGCTGGGGCGGTAGCA
ATGTCAGTGATCATAGCAGTGGTTTCAGAAATGTTGGCAGACATTCTGTG
GAAAACAGTGAAGTCACCGTTACCCAAGGTGTGGTGCAACAACAATTGCT
TAGCTTGAGCAGAGATGGATGGGACACCAACAACGTGCAAAACACCGACG
TGTTCAGCGTAAGAACCGGCAATACCGTTCAAAGCAGACAATTCACCGAC
ACCGAAGGTGGTGATGATACAAGACATACCCTTGATACGAGCGTAACCAT
CAGCGGCGTAAGCAGCGTTCAATTCGTTGGCGTTACCAGCCCATCTCATA
CCTTCAACTTCGTAGATCTTGTCCAACAAGGACAAGTTGAAGTCACCTGG
CAAACCGAAAACGGTGTTAACGTTGACTTGCTTTAATCTTTCGAACAAAT
ATTTACCCAAAGTAATTTCAGACATTTTGATTGATTTGACTGTGTTATTT
TGCGTGAGGTTATGAGTAGAAAATAATAATTGAGAAAGGAATATGACAAG
AAATATGAAAATAAAGGGAACAAACCCAAATCTGATTGCAAGGAGAGTGA
AAGAGCCTTGTTTATATATTTTTTTTTCCTATGTTCAACGAGGACAGCTA
GGTTTATGCAAAAATGTGCCATCACCATAAGCTGATTCAAATGAGCTAAA
AAAAAAATAGTTAGAAAATAAGGTGGTGTTGAACGATAGCAAGTAGATCA
AGACACCGTCTAACAGAAAAAGGGGCAGCGGACAATATTATGCAATTATG
AAGAAAAGTACTCAAAGGGTCGGAAAAATATTCAAACGATATTTGCATAA
AATCCTCAATTGATTGATTATTCCATAGTAAAATACCGTAACAACACAAA
ATTGTTCTCAAATTCATAAATTATTCATTTTTTCCACGAGCCTCATCACA
CGAAAAGTCAGAAGAGCATACATAATCTTTTAAATGCATAGGTTATGCAT
TTTGCAAATGCCACCAGGCAACAAAAATATGCGTTTAGCGGGCGGAATCG
GGAAGGAAGCCGGAACCACCAAAAACTGGAAGCTACGTTTTTAAGGAAGG
TATGGGTGCAGTGTGCTTATCTCAAGAAATATTAGTTATGATATAAGGTG
TTGAAGTTTAGAGATAGGTAAATAAACGCGGGGTGTGTTTATTACATGAA
GAAGAAGTTAGTTTCTGCCTTGCTTGTTTATCTTGCACATCACATCAGCG
GAACATATGCTCACCCAGTCGCATGTTGTTACCCTCATGAAACATGTATG
AGATATTACTTTGAATAGGTTACTTGCATGCATTTCGGCGTGCGGGTACC
ACCTCTTTGCATGAGCTTGTTCCTTTTTCAAGTTGAAGACTATATATTTT
ATTGAGTTTATGTTATGGGGAGGCTACCCTTTACGTCCTGGTTGTCCCTT
CCCGCCTTGATTTGGCCTTCATTTTTTCAATTCTGGCCTTTAGGGTAGAT
GTCACTGCAGCGGCACGTTTATAACTTTCTTCTGAGGCAAAACTATCGTT
GAAATCGATATCCAAATCGTCGGAGACACTGCTCACTCCAGTGCCGTTTT
TTCTGTACGGCCGTATGTTAAGAGAGTTTACGCGGTGCGGCAGGTCGCCG
ATGGACTCGCTTGATCTTCTTTCATAGTTGACGTC
>89
TCATATTTTTTTTGATTTGTTGACGAGCTATAGGATGATGAAACGGAGGG
ATATCAAAGTACGTTCTTCAAGCTTACAATTTCTCAAGGTGCTTTACTGG
TCAAGATATTCAATATATAGCTAAATATTTATACAAAATGTTTGTTGACG
GTTTGTTTATAGTGTTTTCAAAACACCACGAAAAGACTTCATTCTTGCAT
TCTTTTTTCTACAAGATGAGTCTATACATCTGAAACTGCGACGCCATTTT
TTCCGCTGTTCGGGGCATTCTTGGCCAAATCCTCGAAAGAAATAAAACGT
CAAAAGTAAAAAAGGTGGGCTAGACGAAACGTTATTATACGTCATAATTG
TAGCCGTGTATGAGTGGGTGGAACTTGTATAAATAAACAAGTTCTTACTT
ATCATATTCTCGCATGCAATGAAATTCTCCAGATTATGACGCTTAGGTCT
GGCCAGACGGCTAATGAGGTCCAGAGGAAATAGAAGGATTGTAAGCGGCC
TCCACTAAATTTTGACCCCTCATACATGCTTGTTCAAACACAAAAGATTG
AGGTTGAAAACTTGGCAAGAATTGGGCTAGGAGAAAGTGGCCAGGTGCTT
CTTGTTCAGAACCAAGCAGATATGCTAGCACAATGTGCACCGTTCTATTT
TTTTCTATAGTGTGTTTACATTTCTTGGCACATTGCGTTCGGTTTCAAAT
TTGTATAATTATTATTGGAGCGAGACAGGCGTTTCTGTACCGCTGTTATT
TTTAACATCCACTGCGTTTTATGTATCTCTAAAATTGTGCGTTGCCTTTC
TTTTGTTTATATTTTTGTTCAAAAAATGAGTTAATAATGATTTTTCATCT
TCGGCTTACCGGTCTTGAAAATATTTGTTAAGACAACAGTGGATA
>90
TTTCTTTTCTGAAAGTACGACATCAAAGTCGCCGAGTTTTGTCTTCGGAA
TAAATACTAGGTCAGATGAATAAAGAGCAGGAATTTACTATCTCTGATAA
TTTATTATGCTCCTCTAGTGCAATGGTTAGCATGCATTCTTCCGGTGGCT
GTGATCCGGGTTCGAGTCCCGGGAGGAGCTTTTAATTTTTTAGCGCACTA
TTCTAATTTTTAAGGAAAAAGCATATTTCCGAGTCAGTGCATAGAAAGAA
CGGAGGCTACGATGCCAGCACAGTGTCTATAAAGTCAAGAAATACATTCA
AACTCTTCGCGTAAGGGCTGTCAATTTTTCATTTCCCTCAAAGTTAATGC
GCAAGAGTTAGGATGATCTTGATTATTAGTTATTTGTTTGTTCCATCAAT
TATGCCGACGTCCATGAATGCTATTGAAGTATCGATTACTTATGCTATTC
TATTGTATTTGAGCCGGCGGCTAGTAAACAAGACAGCATACCTTTCCAAC
ATCCGTACATATTGATTATTGTATCTATGATTTTCATGTAATGTATGGGT
TAACTAATCCTTTCTCTTCTTTTTTTTTTTTCTGAAAATCAGTAGCTAGA
GGAACCTGTTCGTGAAAGATATGGAATATTCCGTCTAGGGAAGAGCCGAG
AGCTGAGAGCAGTATCCATCGGATGGAATCTTGCCTGGATGCGTAACGAC
GACAGCTTGTCTAGAAGGCGAAGTACAAGATACTAAGAAGACTATAACAA
CAGAAGACAATTTTGTAGTGCGATTCTATATTATTGACGTAACCAACAAA
AAAGTATCAGAATGGCT
>91
GGCGGCTCAAGAATCACTACGAGTGTTTTACAAACAATTGTGAGGACGTA
CTGGTATAACATGCCTATATTGGAAACGATAGCCTATCCACGTATACACC
ACCAGTTACTGCCCGACCGCATAGAACTGGAAAGCTTCCCCATGATCGGT
AAAGCCGTACTAAGCACTCTCAAGGAAATGGGATATACGATGAAAGAAGT
ATTTCCCAAGAGCGTAGTTAATGCTATACGCAATGTCAGGGGAGAATGGC
ATGCGGTGAGTGACTATTGGAGAAAAAGAGGAATCTCCTCCGTATACTAA
GATGTGGGGTAAGAATGGTACTGTAATATAGTTCAAGATAATAGTACGTA
ATGTAGGGAGCCTGCTTCTGTGGTATATAAATAAATACTGGGCTTGCGTT
TATTTTTAAAGAATCAATATTTACTTTTCATTAACAAAGGGCATACGCCC
TTAAAACAAAACAAAAAATCCAGATCATGCGAGCTTTGCCTTTTTCAGTA
AGTTTCCCTACCTTGCAGCCGAGACGCGACTTCGGAACGATGCCAGCATA
CGTATTTACCATTATTAAAAAAATCTGATGGCTTGATACTGCGCGTTTCT
TTTTATAGCATTAATACGCACACATACGCGCATTGTTGTTTACTATAAAT
AAACCGTGGGGACCTGACCCAGTCATCCTCCCTGTGTTTACAGTGCGGTG
CACACGAGCCTGAGACAAGCCCGTAACCAGGCGCGTTGCCGCAAATACAG
AGGCGCCCCAGACAACACCGCAGTGTGAAGCACTGTCAATTTAAAACCGT
GGCTTGCTGGAGATGCCCAGACCAACCCTGTTGGGTTTTTCTCTCGAGCA
CGCCGTTATAATTTTAGCGTGTTCCGTACCTGTGTGCACATCAATAAGCG
GTGTAACAAACTTGAACTTGCCATCTCATATCGTCATATGAGCAGTTGCA
GAGAAAGGCACTTTAAATAAAAAGGCGTGGATGATAAAAA
>92
ATTCGGTAGCGTGCTCGATGTCAACAAATTTAGTAGCTCACGTGTATACA
ATTGCTCTGTAGGACCCGGCGTTGCAAATAATGTATTGTCGAAGTCGTAT
ATGTGCAATTTCGTAATCGCATGCTCAGGAACCTCAAAGGGCACGGCCAA
CTCGCAAGCGCAACTATTCCATTTTCTGAGCACACGGTGATTGCCACATC
TGCTGGACATCTCCCCTTTCCTTCGAAATTCTTCAAATTCTTCCATTATA
CTCGTTTGGGTTATGCAGACAAACAGCACATATGATAATTCATTTTTTTT
CTTCCATTATACGCTATAGTAATGTAAGACCTGATCTACGGGTTCGTTTC
TTCTATTTCCGTTACCCGCCGTGCACCACAGCATCGCTGCGGTTCCGTCT
GCGTGAGTCGTTCTGCGCGAATCACTTCCCGCAGCTGACATCACAGGGGC
GGCCTTTCCTGGCTACGATTTTTTAGCGGGAAAGGCACACCCTTTCTTCT
CCTTTCGGGTATAAAGTTTCTTCTGTGTGGATTCTGTGGGCCAGCTTCGG
TTTTGAAGTTGGAAAAAAATTCTTCATCTTTGTTTTTTTATCGTGGAAAA
GGAAGAAAATACTTGATAACCAACAGCAAAGCCGCATGGCTTGGCACTCG
ATCTTGATGTTGTCCCGTGCCTGGTTGTATAATATTATTATTAATGGCCA
TTTCGTAATCAAATTTCGGTTTGTTGTTTTTTTCTATTTCTTTTTCATCT
TATATATATTAATTCGTTTGCCTTTTCCGTTTCTTTTTGTTTTAGTAATC
ATAA
>93
CAAGATTAACGCTGGTGAAAACATCGAGAAGGCTCTAGCCTTAGCGGGAA
AGCTGAAAAGAACAATAACATTACCTCAGCTAGATTAAGAAGGCCAGATC
TTGTGCGCTACAATCACTTCGTCTCGTTCCCTTACATAAAAAACTTACGT
AGCTACATTGTCGTGCGTGGCATCAACCTAATTATCCTAGCAAAATAAAA
GAGAATGTTACGGGACTAACAGGCGGATGTAAATTACTCACTTAAACGCA
GCCAAACATCATCGAGAACTTAGGGTAGCGTGCCACAAAATTTGCATGAA
TAAACTTTTGTTTTCCTAATTCGACAGCATTCCCTTGTTCGCAACACTTC
ACTGATAGGAAATCGAATAGCGCACACTCTCTTCTGGGACATACCCCAAT
GCGGTAAAGCCACGAAAACACCGCGCGTAAAGGGGTAAACAAGTCCATTC
CTACAACCTCTTGGAGAAATTCTTTACCTACTACAACCCCGCGCCTGATA
CTTTCAGTATTCATGACAACTCGAGCCAGATCCCGCTCGTGGGCGTGTTC
ATTCTGTGACGATCCACTAGCGACTTCTTTGTTCAGCCTGCAAGAGACGC
GTTCAAGGAAGAATTCGCGATTTTACTTCTTCGAGGGAATCTCGCACCGC
GTTAGTTAGTTTCCAACCTTGAAAGCATCGGAGACGCATTTTTGGCGATT
TTGCTGGATTGAGCTGAATGGTGCCAGGTCGAGGCTGGGAGGGAGACTAA
CTCGAAAGTGACGAAGACTCGAAAATTAAAAAAAAAGATACTGCAGAAGG
CAAGATTGAGAATGGAGTAAAGGCAGCGTGGGTCCCCTGTGGAAACCGCA
GTTTTCCTGCGC
>94
GTAAATCTACAAAAATCGTTAGTGCTGTTTTCTTTTTGAGATTGAAAAGT
ACGAATCATACACATCTCTTATTCTGAGAAGGGTGCATATGACGTAAATC
AATGCGTACAAAGCGGTTTCCGGTGCTGGCCTGGCCCACCACAGTTTTGG
CGTGGTTGATTTTAAAAACCTTCGGGAAGGTGAAAAAACCACTCCGAAGG
TTCGAGGATGACAAATCGCCCCTTAGCTGTGGCCATACAAGCTTGGCACC
GACGAAAAAGGGAAAAAGGAAAAGAATGTCGTACAAGAACTCTTACAACC
ACGTTGAGATTTCATTTAACAACGCCCCCCTTTCCATTATATAAGAAGGC
ATTAATTTTTATGTAATAAAAAAAGAATTTCTCGAAAATGTCTTACAATT
AATTTTTTCTTTTGTAGAGT
>95
GTTCAGCTCAATATTGCAAAAGTATAGTATTTAACTCTTTTATTTGGGCC
TATATAATAGATGAATTTAAAATGGGAAAAATATGATGCACGCTTCAAAG
ATACACTGTAAGACAAACTTCACGCAGACATCTTTCCCTCCATTATAAAT
ACTACAGTTTTGAAACAAACGTGGAAAAGAAGGCTTATGGATACGGCTCT
CGATGGAGAAGTTACTGTACACATGAAAACACGAATAACTTTCAAACGCG
TGCGACGTTTGTTACCATATTCAAACGTTTCAACGCGAATTTTTTGTCCG
CTGTTTCGCGCAATTAAAAGTCTTGGCATTTTTCTCTTCAGGTTTTACTT
CGTCCGAAATCTTCGAGGACTTTTCCGAAAAAGGTAAATTACTGCAAACG
GTCTTTCGCGAAATCTAGACCGAAGATCTCTGGGGATATGTAAGGAACAA
ATATTTTTGTCATTGAGGGCTTAGATAAAAAGAAAATCTAGATGTCTTGC
CTGAGAAAAAGAAAGAGGGAGGCATTCTTTCTTAATTATTACCGTGCCTG
GTATCAGCATAAGTGAAGGCCGAGACAGCTTTCGTATATGGCTGTTGCAC
GTCTCTGAACTAATCATTCTCGCCCATCAAGATCGGACCATCTTGCCTAG
TGCGGCAATGATGGTTAAATTATGCGGGTAAGAGTTTTACATGGTCAGCG
GCTATTTGGCGAGAACCTTCAAAAGTAATTATGCCTTCTA
>96
GTTCCGTAATTGCATCTGCGTAAGAAGTGTTACTTTACCAGCGCGAGTGA
ATTTTAACTCACTTCTAACCCTTGATAAGATTTGAAGGCACACTAAGGAA
AAACAAGCTAAAAGACATTTCTAACGCCTTGTAAAGATAACTAATTGTGC
TCATATATAAGGTATATTCTACTCCACATGAGATACGAAAAGAAGAAGAT
TCTCAGACTATTTAACTCTTTGTCCTTTTTTTACCTTTTTTTTGATTTTT
TTTTCACTTTCTTCTGTTGGTAAACAATGCCAAGGTGGAGAATATGCGGA
AGAAATGTCCGCAAGGTAAAAAATTGTTGAAAAAGGCGACGCGTCCCTTT
GTAGGAGCTTTTCGAAGGCGTATACGAGCCAAGAAAAACCTTATTTCCCA
GTTTGGCCAGACCGGCTGCATTGGGTGCGACGGTAAATTCTCTATAGGCA
TCACCATTGAAAAGTATGTCCTTAATTTAGTCGTGAGAATCATCATTGTG
TTCGCCCTTTGTCGTATAACCGAATTGAGTGTCTT
>97
TTCTTTTCAAAGTAGCTGCCAAAGAGCTGAACCTTTAGGATCCACTGAAT
TAATAAACATTGGTGATATACTGCAAGCAACAAGGAGTTCTCCCCATCGA
GTGGCAGTAGTTCTTCCCCCTCTCGAGGGTGCCCCTTTCGGTAGTTTGCG
ATTTTCTTCCAGAAGAGCACCGATTGCCCCATCCGGAAAGTACTATTTCC
CTTTTGGGTAACAGCGGACCGAAGCGGAAGCGTTCGAGTAGCCGAGGTAT
ATGATTTCCTCTTTGGGCAAGTTGTAAACAATAAATGGTAAAAAGTTATG
AAATATATTCAATGGTAAAGGTCCATTTGATAAAGTACACATTCACTGT
>98
AAAAGACGTTTGTTTCCTTAAAGGAGCTGGAGGAGCCTGTTTTGGATAGC
GGCGTAGTCGCTTTATTAATTTGGTTATACTTTAAACGCAAAGATGGCAG
TACGAAACCAGCAATGCAGTGATTATATATTCCCTACTAAGGAAAGTTGC
GCATCCAATGGGAAACATTTTCCTGATCTGTACCTTTGGCAACCTGAATA
TGCGGTTGGCTGGCAAATAAGGTAGCGTGGAGGCGGTGTTTTTGCCACAA
ACCAGTACGCCCAATCTATCCCTGCGAGCCACCGTAATGATGCAAATTGC
AGTAAAGCAGCGCTTAGCCTCCAGCCGAAATTTACTTCCGTCGAATGCAC
GTTGGCCAGAATGTCTCTCGTCCCCCTTGTGCTGCGCAAATAACAACGCG
TTGGTGCGTTCTGGAACGCGAAGATTGCGAAACACGCCTCCGAACTGACG
TAGCATAGAGTCTTTCACAGTATTGCCTAATGCGGAAATCACATTGCCAT
ATTGGTGAAAAATACAATGGCTAGTTTGATCTATTTTTGGGTTATGGTGT
CTCGAGCGTAAAAAGTGAAAAAAAAGTATATAAACGATCTGAATTTAAGG
CAGAATTCTGTTTGCCGCTCTCAGAATGTACTGTTAATTACTGAGGTCTC
CATCAAACACAAACCCCAACCTAATCGCAAATAACCTGAATAAAAATGGC
CAGCAGTACTTCCACTTCCGCTTCCGCTTCCTCCTCCATCAAAACTAACA
GTGCCTTAGTTTCCAACAATGTCGTTGCCGCCTCTTCCGTCTCTGCTACT
TCTACTGCTAGTTCCAGTGCCGCTAAGAACACTACTTCCAGTTCAAAGAA
CGCTGCTC
>99
TTAATCTTCGAATTCATCTTCGTCGAATTCATCGTCATCGAATTCATCGC
TTACTCTTGAATCCAAATCTTTATCGTCCATTGAGTTGTGGGGTAGCTGA
TTGCGCCCTGTTTCATTAACACTTTGCTCCCTTCGTGATTCGGTATCTGA
ATTCCCAAGTGAATGTACGTCATTTGAAACGTTGATCTTTGAAACAATTC
TTGTTGGAGCGCCGGCCTTTGACACAGAGAGCTTTTTGAACTCTTTATCG
ATACTAGTCGCGGCTGCAGAAGATGCTCTCCTTGATTTAGTTCTATTGTA
ATTGGAGTCTTCAT
>100
ACATGATTATATATTTATTATGCTTTTCAGTGTTTCCATTAGTTTTATAT
GATAGCATCCTTATGTCTTTTTTCATACCTATATAAGCAATAAGAAGTTA
TGTAAACAGAACTTTGCCACTAATACCATAATTACTGTCTTTTAGTATCA
TTGTCTGTCAGTCGGCACGGATGAAAGGTGACAAACGCCTAGCCGCCGGA
GCCTGCCGGTACCGGCTTGGCTTCAGTTGCTGATCTCGGCGCGGAAAAAT
CAGCGCCCCACGCCAAAAGGTTCGTATTTTTTCTTTTTTTTTCTAATCTT
CCATCTATTCGGTAGCGATGATTCATTTCTCTGAAAAAAAAAAAAAAAAA
AAA
>101
GGGTGTGGTCTGTATGGTAGCAAATCCCTCGTCCTGCGAGCCGCCACTGC
TGTTGGGCTGAATTTTCAGCGGATAATGTATTGTCTTATTTGCATATAGC
TCGCCCATGGCAGAATACTTGGCCACCTGCTCCTTCCATTCTTCCTTCGT
GAAGCACTTCTTTCCATACGTAAAGTCTTTCCCACCATTCTTGCCTTGGC
CGCTGCAAGATCCGCTCTTCGTGGTCTCGTTACTAAGAGTAGATATAGTC
ATTTCTATTTGTTACCACACACAAATATATCTTCATCCGGCTGATATTTG
TCTCTACTGCCCCTTTGCTTGCAATTTAATGACCAAATTACACATGTTAG
CTTCAAGAAAAATGATGTACCATCAAAATGTCTCCTGCAACGAACCGGGG
CACCGCGCCGGCAGAGTCAGGAAAGCGAGATCGACACTGATAGTGATAAA
CAGCAACACAATGGAGCGATTACCATTCACTCGGAACGGATCCGGACAAC
AGTCAAATAAACTCCGGGATCCCAAAAAGGGCCGTACACACAAACCCAAG
CCGAGCGAAAAACACAAAAAAAATAAAACAGGGAAAAAAGGAGCGCAAGA
GAAAACGCACAGGAGTAGGAGCAGCAGAAAGGGGAACTAATATGGTTTTT
CCGTTTGCTTATTTTTATTTTTTTGTTGAGTCATGGGCACGTCACCGCAC
AACAGCCGCCGCAGGCCTGTACCGCTACGCGTCTATCACTGCGAAACATC
GCTACTTCTGTCGCCGCGTCGACGCTGGTCCAGACCACAAAAGGATGCAC
GATCAGAAGCACTGTACCCTGCAGAGTTGGAGATAGTGTAACCGTGACTT
CATTTTTCAAGCGTGGTTTCACATTCTTTTTGCACCGCCCTTATCTCAGA
TATAGTTTCGTTCGGTTGCTTTGCTTTCCCCAACTGAAGGTGCTGGATGG
CGGTTTTTCCGGCTGCTGCGATTTTCCCTGCGCGGGGCCCGGCGCGGAAT
TGTGCAAAAGCTAAAACTCAACGGTTATTTTGAAATATAAGGTTATAAGC
AAATTTCCTAAATTTGCTTAATTGTTAATGCAGTTGTTATTGCATTAAGA
CATTCGGCTATCGTTTCCTTTCTTCGTGTCGGCAATCTTGTATAAAAGTT
ATTTTTTGAGTTTCAGTTTCTTGTATATCTTGGTATATATTGAAGGAGGA
TTTTTTCTTTCCTGGTCCTTTTACTTCCTTGCGTCCCCTCATATTTCTTC
TATTTCCGTTCACGGCGTTTTTTTATTTTCTCCATCTACTTTTAGTGATT
TCCTTTGCTCTAATATTGTTTTCGTTCATAGTGAATTGTTTGTTTTCACT
TTAATAAAGGGCTTTTACGACTTGTCTCAAAAAATTTCATCGAGATGCAA
GCCCCCAATATCTACCCCTTCTCTCAAACACAGCCACAAGCACTGCCCGG
GTTCACATACGGTCCTCCACAACTTGTTTTTGACCATTCTGCTCCGAGAG
TAGATCCTTTGCATTCTACTGTAACTATAAATTCTCCATTACCCTTGCAG
CATTATAATGG
>102
GGTCATTTTTGTGCTGATCGAATGGGTTTCTGCCTTGCAAAGATATCTTT
ATTCTTTTCTTAGTCTAAATTTTTTTTTTTTGGCTTGCCTTTAATATATT
ATTTTTCCGAACAATGAATTTTTACCCTCTTCCATTCTCACTGTGTACTA
GTTGTACGGGGAAAATGCTTAGTAAGCGCAAATTTTTTTTTGATAGTATA
TTATACTGAAATGTACAAGATTAACTTTT
>103
GATTTAACATGGCAAACAAAAGATTACATACGTACTGATCAAATTGATCA
ATTCAATATCTCTGTTTTCGTTTTTAACATTCAACTACCGTCATAGCGTT
ATACGTAGGAAAAAAAAACCGCAATCACGTAACCGTGGCTTCCACTAATC
GGCTCTTGTGCCGTCAGATTCCGGATGTACGGGTGGACGCCATTTGGAAC
GAAAAAAAGAAATTGAAAAAAGTGGAAGCTAGAAATCACTGTCTTACCCT
GGACGGTATCGTATATAATGACTCCGGTTTTTTTTTCTCTACCCCCTTGC
CTCTTACCCCGGATTTTACCCAACTTTATCTTAATCTTCGTTTTCCTTTT
AGCGTGGAGATGGTAAACGCTAGCGGTAACGTTAACGTTGCAAAGGGGGT
ATGCGGGACTGGCTGAAACGGGCGATGATACGATGCAACAAAGCAGCAGA
GAATGGCTATGAATAGTCTTTACACCCACAGTTTTTCGTGTGGCAGTTAC
TATATATTAGTAGGATATTCGATCTATATAGATGGTAGTACTTACAATGC
TGTTCTTGGGTTTTTGCGGATCTTCTTTCTTTTTTGTAGTTTTATTTTAT
GTCTTACTTCTTATTTCCTTCTTACTTCCTCATTGGTTAAGGCTCACGTT
GATTGCAATAACAA
>104
CAAGAAAGCACCAACAAAATAAATAAATAGCATGCCTGTATATATTACGA
AAAGTCCTTCAACTACGTCTTCCACTTGCTCTATCCCTTGGCGGAAAACA
GAATACATGCAAATTTTAGAGAATTTTTCAAGATGCCTGCCCCCCACATT
TTCTTACTTGATCAAGAGCAGATCTGTTCCTTTGCGCAGGGGGTTGCATG
GGGGAGAAACTGGCCGGAAGCAGCCGAAAGAAAGTTCGCAAAAAGATAAT
GGGGACAGTATTAGAGAAAACGGCGTGGAGGGGTATGGAGGAAACAGTTA
GCATAGGTAACGAAAAACCGCAGCAAAATAATTCTCTCTTTTTTTCTTTT
GACTTAGTTGTGGGACCCGGATCATTCGGTACTGCATCTTATTCCCGTGC
CAAGGTCTCTGGGTGTTGCTGATTTCCGGGTATCCAGAGCTCTATCTGCT
TCCGTACCCAGTGAGTGAGCTAAAATAAAAAAGGGGCCTCGGCGGAATTT
GAATTCGGGTTACGTTTCCCACGGAGCCCCGGATAGAAAAGATTAGTTTC
AGGTACATGTGTCAAATGAGGATAAATCTCAAACACCCATGTACCGAAAA
TCGATGTGTTGGTTATATTACAAGGTTGGAATAGACCACGGTGATAAGAC
GTGGAATTTTTGACTGACCATGCGACTCTGAAGGTGTTAACCGGAGGAAT
TCACGTAATTTACATCTCAAGAACAGCAGAACAAAGATCGAGTATATGAT
GAAATTTCGTTTTACATGAATAAAGTCATATTTTAACTCACTGTGCACGG
ATTAAGGGCTGTGATTTAGTGGGACGAGTGGTTCTACACTACTCAAGAAG
TCACGCTGTCATTTGATGGAATTACAGTGCTTATTAGGA
>105
TCAAACCATGATGAACTAGTTCCACACGCATATCTTAAAGCGTGCTATTT
TTTAAAAAGGGCAAATTTAGGAATGTCTGACGGAATCCCTAATCATCTTT
GGCTTTTCCCTTCACTCCCTTCTTTTACCGACGATGGTTTGAAGGAAAGA
GAAAAATGAGCAATAGGAAAATTCAGTAGTCGATTTCCATTTCAATTCCC
TATTGGGTAATGTGGCGGCGAGGGCTAAACATTCGGTATCATTGATTCAA
TGTTCTCACAATGTTCAAATTCTCGGATCGGGTATCCCTAATTGGGATCT
CTTTCCAGAGGAAGGGGCCTTGATGTGGGATTGAAGACACATGAGTTTTT
TTCTCACCGTCGAAACTTTTGCTTACCCGTAAAACATCGGCCATTCGTTG
GTTTATTATGTGACTTTTTTGTGACTTTTTTTTTTGCGAAGTTTTCTCGT
CATCCGCGGAAGATCCGGCGGGCGAAAAAGTCTCTCACTTTTACCCAATC
GGGGCATGTTATGTGGACATGTTATGTGTCCAAGAGACACATGAGCCCAA
AAAGGGTACACTGTCTAAATAGTTTACCCTTTACGAATCGAAACTTCTCG
AAGAAGGGGCCGAAAATTAGCGCAGAAGTTGACGAAAGTTTATACTTTTC
CTAATGGAGAGGCTCAGGAGCTGAAAAGGGATATATTCGTACTCTATTGC
ATCTTCAAACTCCGAAGAATCTCAGTAGGGAGTGAAGCCGGCTTCTCGAT
GCTACAGTTCAACATCGATACTTTGAAGAAAGAAAGCGCCTATTATATCT
CTTTTACCCT
>106
TGGAATCCTTCACAAGGATTCAATATTTGTTTTTCCTGGTTATTTTGCCA
TCATTCAACTTTCCTCAGACGTAAAATTCGTGCTTAGTGATGTCTCAATA
TTCCCGCAGGGTAATAAAATTCAATAACTATCACTATATACGCAACAGTA
TTACCCTACATTGCTATCGGCTCAATGGAAATCCCCATATCATAGCTTCC
ATTGGGCCGATGAAGTTAGTCGACGGATAGAAGCGGTTGTCCCCTTTCCC
GGCGAGCCGGCAGTCGGGCCGAGGTTCGGATAAATTTTGTATTGTGTTTT
GATTCTGTCATGAGTATTACTTATGTTCTCTTTAGGTAACCCCAGGTTAA
TCAATCACAGTTTCATACCGGCTAGTATTCAAATTATGACTTTTCTTCTG
CAGTGTCAGCCTTACGACGATTATCTATGAG
>107
GCCAGTGAAGAGATATTCTTCTATGAAATCCCCAAGATCAACGCAAAATT
TAGTGGAAGTGGTGATTTAATCAGCGCCATGCTCACTGACTCGTTACTAG
GCGACCGCCGCTGCACACAGCTGTCATTAAGCGCATCCTTGGGCCAAGTG
CTGTGGCTCGTCACCAGTATCCTACAAAAAACGTATGATTTAAACATAGC
TGAGCGGGGCCCACAAGATTCCACGATAGATATCAAGGATTTAAAGCTGA
TTCAGTGTAGAGACATCCTAAAGCAAGATCTCATACCCTCCATTGGCAAG
CCAAAAACCATTAAAATATGATTCTTACGAAACGGTATGCTCCTTCCTCA
TTGGGGTGCGGCTGCTGCAGGAACCTGCCTAAATAGGAAAATACATTCCT
GATTTGGAAACTGTAGGCACACGACGCGTCCCTTTGGAGAAGATCGATCC
TTCTTTGGGTCTTTCAATTTGATTGGAAAAAAAATATTTAAAAAAATAGA
AGAAAAATATAGAATATATAGAATATATAGAATCAACTACTGCAGT
>108
TTTATATAATGGATGGATATCAATTGACATTTTCAAACAACAAGAGGTCG
GATAAGTCGATAGTATCGGAAAAGCTCCAAAGGGATTGCGATCCTCCAAT
AACACAAAAGTATTTTTGGTCTAGCGGGGGTCATACTTTTCATTTCCGGG
CGGCTGCGGCGGAAAAAAACGTGACGCCTTTTAGCACAAAAATGCAAGGT
AAATACATAAAAAAAAAGGCAATGTGAACGTAAAAACGCTCATATTTACA
AAGATTAATTGAGCCGTTCAATGAAATGCGAACTTCGGAGATTTCTTTAA
TTAGTTTAGGTATACTTTCCTGCGAAGGTCTTGTTGGAATATGTAGTAAT
CTCTACCCGCGTTTTTAGTTAATGCTGAATGGTTTTTGATGGCTCCTTTT
TTCTTAGAGTGACAGGCGCGGCAGCCCCTTAACGCGGGTACCTGAACAAG
TAAATCCGAAAATTCAATTTGACAAGGGAATCATTGGGCTGACAACAATA
AGATGAGCTCTCTTATATTTTTGCCCAGGGAAAAATTTTTTGCCCACTAA
AGATATGCAATATTAAAAAATTTGATAAAAATAAATCAATGGGGGCGAGC
CGGGACTCGAACCCGGGACCTCCCGCACCCTAAGCGAGAATCATACCTCT
AGACCACACGCCCGGTAGAAGTTGTTTTAATGAATTTCAAAATATGGTAC
CTCAACATCAATAGATCATCAACCACAACGTAAAACATGCATGTGAGGCT
TAG
>109
TTATGGTTGTTTGAAAACCCTAGAAAAGTGGCTAATTTCGGATAAGAATT
ACAGATAGGATCTCTAACATAATATAAGTTGTTAGGGTATTTAGCTAATG
TTTTTATATCGAAAGCAGGGGATAACAGCGGAGACAGAAAACAGGGAATA
GTGATCTCATCTTTCCATCCGTTCATCCCACTTTTACGTCCTTGTAAATA
GTACAAACTGCGGGTAGTAATGCAAGATTTGATGATATACAGGGTGCTTT
TGCATTGCAACCCCCTCCCTTAAAAGACGCTGGGGAGCAATTTTGTTCTA
GAAGTCCCCTCTTTGTCGTCTTCCCAAATCCGACTTGTGCGGCTGTGCGG
CTGTGCACTTCAGGGGGTGTCCTTGCCGTAATTTCGAGGAGTCTTTGTAA
GTGATTAATTTTCTCAAAAATTCAACGTATGAAAAGGTGATAGTTTCGGC
ATCTGCGATATTCTTTTGGACCAGTTAGTGATGACGAAGGCCCTTAAGAT
TATGTTGGGAGCCAAATTTTCGTAGTTGCATACGTAATTTTGAATTTGAT
TTGCTTTTTTTTCTTTTT
>110
AACCACACGAAATAATCGGGCGTGTGGTCTAGTGGTATGATTCTCGCTTT
GGGCGACTTCCTGCCTAAACAGGAAGACAAAGCATGCGAGAGGCCCTGGG
TTCAATTCCCAGCTCGCCCCGTTATCTTTTTTCACCATCAGGGCGGAATT
TTTTTGTTTAGCATCAATCAACCTAACCTCTCATGCTTCTCCAAGCTGAA
AGAAGTAAACTCACTCTATGTACGTGTTGCAACATATATCTGCCAAAAGA
ATGAAAGTAGGTTCAGAACAAACAGATTGAAAGGAGACCAGTAAAACTAT
ATGGGGGGGGTTGTTCTTCCCGCCTCCTTCTGGGATTATGAAGACGCGCT
GATCTGCTATAGTTCAACGTCCTTTTCGCTTACTATTTCTGGTAAGAAAT
ATAAGGAATTCTCGGATTAATTACTTTTCTCGAAAGGGGATTCCGAACAC
CTACCGGAAAAAAATAGCAGCCCTTAAGGGGAGAGTACGGCTCTTGGCAT
GACGGGAGGCAGGACAGCACTAAAGGCAGACTAGTCACTGAGCGCTCCAA
GTTGGGTATGATAGTATCTTCAAGTTTTGGTCGAGTAGCTATTCCTCTTC
TTCAAAGCCACTTACGCTTCGCCCAATAATGTCATGATTTACAAATAAAC
CTTCCTCTCCGAACCCTTAAAAGTAGGCAAATTGAGAAAATTTTTTGCTC
GTCTTTTTTTCTCTCGTTTCGATTACCTTATTGGGAACTTCTCGAAGAAC
TCGGCGAAGAGGTCCAG
>111
TGATTATGTTTCGTTAGAGTTTTTTTCTATATCTCCGTTCTTATTTCTTA
AGTCCGCCCCTTGCTGTAACCAGCCCGGCTATTATTTGACGAATTTTTCA
CATCTTCATTCCTTGCCGAGAAAGAAGCTTTTGCCTCCCTGGGGTTATTA
TAAAATATATCTGACGTCACTGGTTTGCAGCCAAAAAGTTTAATTATTTT
AACTTCAAGGGTTCGTTTCGGAGTAAATAGTCAATGCACAAAATAGGAAG
GTGGAGGTGGGGTATGCATTTTTGTGCATAGAGTGGCGGGGTATTAAGAA
TAATGCACATATAGGCACATAGGCACAAATGCGTGGGATGACTTGACTGT
GCAAAGACCGTTAGCAACCTAGAATGTGGAATAGTATCCCAAATGATGAC
GTAAACGTTCGAGGATAATATTAGATAATATAATATTAGTATCCTCGTCT
AAAAACAGGCAAAATAGCACGGAATCTATTCAAAAGAAGGCGGCAAGCAG
TATCAATTGAGATAAG
>112
CTCGAGTGTCAAGCTTTTAAGTCCTGGGTCTCGTGAAGCCAAGCACGAAA
ACGACGATGATGACGATGATGATGGCGACGATGGTGACGATGAAAACAAT
ACTAATGAAAGACAATACAAAAGCAAACCAAATGCTAGAGATGACAAAGA
AGATGATACTAAAAAATGGAAGCTACTAATCAAGCATGATTACGAATTGA
TAGTCCGTGGAAGCATGAAGTATGAGGTGCCCTTTTTCAATACGCAAAAA
TCTACGGCTATTCAAAAGGATTCCATGGTCCATCCTGGTAAGAAGTGAGT
GTTAAGAATGTAGCTTTTTCGTCAAAGCTGGGTATTTTTCTTTTTATAGC
GCAGGAGCGGAAGGCAATTTCCAAAACAGGAATGTACTTTCCAAAAAAGG
AAAATGTAGTTTGTTTTTTGATGTTTTTTTCTCTTTGACTATTTCAAATT
TAGAAGTGAAAAAATACAAAAATGTTACATAGGATTCGATACAGTGTAAT
ATATCATTATTATTACTTTTAAATAAAGCGTTTAGTAAACAAGAGTGAGG
GTTATGCAACTCGTTTAGTAAACATTCTTTTTTTTTTCTTCATTTAAGTA
TAAGACAACAATAGTAGCGGAAGCGATAGTAATACATTTGGTAGCGATAA
GTGCACATGCAATTTCACTCAGATAAGCAGCATTTGGACAGTAAAACCGA
CATCGATTTCAAGCCAAACTCACCGCGTTCCTTACAAAATAGGAATACCA
AAAATTTATCTTTAGATATAGCAGCACTCCATCCATTAATGGAATTCTCA
TCGCCAAGCCAAGATGTGCCAGGTTCAGTAAAATTCCCATCGCCGACACC
TTTGAATCTATTTATGAAGCCCAAACCTATTGTGTTGGAGAAATGTCCAC
CAAAAGTAAGTCCAAGGCCAACGCCACCATCGCTGTCGATGAGGCGAAGC
GAGGCCTCTAT
>113
TGGGCCTCTACATTACCAACTCCTTCTGACACGAATTTCAGTGGTTTTTT
CTCTCTTGCACTATTAGCATTATTATCACTGGTAGATGACATGATGATAT
AACAGAGCCCACAGTCTTTTGTTGGAACCGCTTTCTCTAGGTTTCGATGG
ACTTACATCTAATTGAACATTCTCGTGCGTTTAAACGTCATTTTTCCCTC
AGATTGGAAGTGCATCAAAAGTAATTCCTAGGGACGACAAAAAGGCGGAA
AAGGTTTCAGAAAAATAAGCGGACTTAGCTCAGTTGGGAGAGCGCCAGAC
TGAAGAAAAACTTCGGTCAAGTCATCTGGAGGTCCTGTGTTCGATCCACA
GAGTTCGCAATTTGAAAAATTTTTTTTAATGATTACGCATGTGGATGTGT
TCAGTATCAACCGATGCTCGCT
>114
TAGCTGTCTAACAGCACCACTTAGCACAAGTACGTCCACCCGTTTCATAC
TTAAAGATCTCAGCAGCCACCCAATCTACATTTAGGGTACCTGTCACATA
TCTTCTCAAATTTTAGGTTAGCTTTCAATTGTAAAGTCTCTTTTTGGATA
TTGCACGTTTCAAGTCAAAACGCGGCTGTAACATAATTTTCTGAAACAAT
ATTAAAACATAGTAATGACTTAAAACAAGCGACTATCGCAAATAAGCAGT
TCCCAGCAAGCAATTAAAACGTATATAAGCGCAGAATAATGATCTATCAT
CAATAATTATCGTGAACTTTTCCAGTATTTACGTTCATCTTTGAAAAACG
GCGAGCATTAACAATAAAAGCTAAAAAAACCAAAAAATTTCAGATGACAT
TATCT
>115
ATAAAAGAAAAGTGTACGTGGAATGAACTGTTTGCTGAGCTCATCCTACG
GTCATTTTAGCCCGTGCCAAGGGAAAGTGACTATACGGTGGGGTATCGCG
GGGTAAGGAGACTCAGGTACAAAGGCAAAAATCAAGATAGGCACATAAGA
AGGCACGAAACTACCCCACGTTTCAAGTTTTGCTATATCCCTTATTTATT
GCGCGCCCTGCAGGAAAATAAGTTTTAGGCACTTAAAAAATAAAGTTCCC
GGGGTCAATTTCTGGTAGTGGCAAGCAAAGTATACTGAAGTTGGCAAGCA
ACACGTAGCCTCTGCATATATCGGCCTTTCTCGGAATGAAATAATCAAAA
AAATATTATGCGGGAAGCCGCTGTTTTATTGAGC
>116
CAGAGAAAGCGCCATTCTTTTTATATGTTTATATCAGAAACAAATAGAAG
TCGATCGTAATGACTAGATTATATAATCAGAAATAGCCTTTGGTGATCAC
TTCCATTTTAGTCAGCATAATAGAAAGTTTAATTACGCGCTTTTTTACAT
TCCGACAAAGATCTGCCCGAGAAAATTCTTCGAGAAGACAACAACAACAA
AAAAAATAAAGCCTGGGCGAAAAACATCGTGCGTTTACATAATATCTTGA
AAAGCAAACAGATATATAAACCGCTATTGAAATTACCTTTTTAAGTATTC
GCCTA
>117
CACCAATTTAGCTTCATGGCAAGGCTTACAGATGATTAAAATCGTGTAGA
TCATGGAAATCGAACCTTTCACGTTCTGCAGAATTTAAAGTGACTCCATG
GCCAAGTTGGTTAAGGCGTGCGACTGTTAATCGCAAGATCGTGAGTTCAA
CCCTCACTGGGGTCGTTTTTTTTCTTATTTCAGATAGTCTTGTCGGTAGC
AAACAGTCAAATCGCTATCACTTACATGTGATATCATTTCTGTACTGCTT
ATGCACTATGAAGTGCGG
>118
GAAGACTACGAACTTCAAAATGAGGAAACAAGAGTGCATTTGCTTACCAA
ACTGGCCGATATAGAGTACTCGATATCCAAGGGTGGCAACGACCAGATTC
AGGGCAGCGCGGTCATTGGCGCCATCAAGGCCAGCTTCGAGAACGAAACT
GTTAAAGCCAACGTATAATCGACGCAAATATGTATAGATACAATATGTAC
AGAACAACTGCATTGTGCAATATAACAACATAACACAACGCCCAGAACGA
AATAAAAAAAATAAAAGAAATAGATGAAAGCATTTTCAATTTGCATACCG
GAAACCGTAAATCAATTGGCGTCTAGCTAACAACTGAGAATGCGAATCGC
CAAATTGTTACAGAAAGTAGCATTCCGTTACGTGATCTGTACTTTAACCT
CTTGGACGTAAAGAATGGCAGAACTCTGGCTCTAGTGTTCTGCGAATGCC
AGATCGGGAAATATTTCCCAAAAGGGCAACAGCGGCACGAACAAGAATTT
CGTGTTAAAAATCGCGTCCGGCGCGAAATTTTTCGCGGAGGCATGCGACG
CAAAAGCGACTCGAAATGTCGGGAGCCAAATGAGGCTACAAGGCTGTGGG
CAGATTTTGGCGTTATTATGGAGAATAAAAGGAATGGTAGCTTCCATATA
GCGATAGGAAAACATATATAAGGTCAATAGGCCTACATGGTAATGGGATT
GATAAGCTTGTCCTTAACTCTTGTGTCTTGGAATTACTATTG
>119
ATCAAAGGCTAGCCACGCTTTGAGCTATAGTTGGTCGTGCTGAGCAATAG
TAAAGAATTGAAAAAGCGAGTGGATGATTTGAAAACTGCTTATATGTTTT
ACGTTGAGGGTTTCTCCTCTTTATTTCTTCGAAGGACGGAGGACAGGTAT
AAAGCAGTCGCTGGAACTCTTTTCCCTGACAATCTTAAAAAGAAAGACCG
AAACAGAGTGTTATAAAACGAAACAAAAAACCTGCTGTAAATGCACTTCT
GGGAGAAGTGCTAGATCACAACATACAAACATATGCAAATTCATAGTAAA
AGGAGATAGGGCCCAGATGACCAAATCAAGAATGGCTCACTGTTGAAACA
TTCTGCTTAATGTCGAAACAGTCCGTAAACAAACACATTCCCACAAAACA
CCGCACCGCGAAAAAAAAAAAAAACAGGAAAAAACGCGAAATGTCCGTAA
CTTTACCCGGTAATAGTCACGTGATAAAGGTGCATTGGTCTAGCTGGCTG
TTCTGGCCAACGCGACAGCAGGGTTCATACTTTCAGTAGAACAAAAATCG
GGGGAAATGCGATGCACTCTTTAACTGCAATTATGCACATCCTATTGCCA
GGGCGGATATTTGATGTTGTTCTCAGATATGTATTCCCTGATCTATACCG
TTCTCATAGTTCAATTTTCTCTGATTTTCTCGTGCGGGCAATAAGTAAAA
AATAGCATTTGCGTGCTTAAGTGAAATTTTTCAGATTATGAGTGATATAG
AGATGAGGACTGTAACAAGAAGGAAGGTGAGGAAATCAAGACGGTAAGTA
GCATGTCCGGGTCGTTAAAATCTCTAGACAAGAAAATAGCTAAAAGAAGG
CAGGTGTATAAGCCCGTGCTAGACAATCCGTTCACAAACGAAGCACATAT
GTGGCCGCGCGTGCATGATCAGCCATTGATTTGGCAGCTGCTGCAATCCT
CTATCATAAATAAGTTGATTCACATTCAATCGAAGGAGAACTACCCTTGG
GAGCTGTATACAGATTTCAATGAAATTGTGCAGTATTTGAGCGGCGCTCA
CGGAAACAGCGACCCAGTATGTCTATTTGTGTGCAATAAGGACCCTGATG
TACCGCTTGTGCTCTTGCAGCAAATCCCGCTATTATGCTATATGGCGCCC
ATGACGGTTAAACTGGTGCAGTTGCCCAAGAGTGCCATGGATACCTTCAA
GTCGGTTTCTAAATATGGAATGCTGCTGCTGCGGTGCGACGATAGGGTCG
ACAAGAAATTCGTATCGCAGATCCAGAAGAACGTTGATCTGCTTCAGTTT
CCCTGGTTAAATGCTATCAAGTATCGGCCCACATCT
>120
TAAAAAAAAAAAAAAAAAATAAAAAAAAAAGAAAAAAAAAGGAGAAACAT
GATTGCCAGTACTCGCAAGAACTAAGATAGAGAGAAAAAGGACGATATAT
CAAGAAATAAAAGGGAAGGTAATTCAAGTAAGCACTGCTTAGCTGTCTGC
ATAGGAGCCTTCTGCAATTACTCATCTCATCGTATTCGTCATAACCCGTT
ACGTAACTGATTTGACCAAGAAGCGTAATGAAAATTTTGAGCGGACGCCG
AAACGTTGTTTTTTTTTTGCTTTAGTCCAGATAATAACCTTTTATAATTT
TCTTTTTAGGGAGGAAGACCGGTCTAAGCTCTTAGAGGTTCTCGCATACC
CAAGTAAAAGCTAAGACCGAAGCAAACACGCAGGATAATTTTCCGGTTTA
CTCTCACTGCAGCTTTAGTATAGATGCAGATCTGGTATTGAGAGAGGGGG
GCCGGAACGAAAAGATTCAGGGGAGAGAAAGGCCCGGGCGTCGGGGAACA
AAACCACTTTTGCACACCTTAATTTTTTAGCTACTCTGTTTCTCCGGGCT
TGTATGGCACATAAATAAAATTCTGCTACTTTCCATTATCTGGTCATCAC
TTACCGATGTGGAGAGCCTTGCCCTTGAAAAATAAGATAAGACCTCCGAT
TAGGGTATTTGAAATTAACCGCTGTAGAATGAAATAAGGACGCTTGTTTG
ACATTTTTTAGTTGCTTTCTCTATCTACCACCATTTGCATCTTGATTTAT
GTCTTGTTTGAGGAGATTTCGGATAAATATTCTTCGAGGGGAAAATGTCG
TAAAAATAAAAACAATAAAGAAACAAAACGATTAAAAGAAAAACTCAACC
ATCCTCAAAAGTCCTCCTCTTTTTTTTCACGTGCTGCGCTGATGTAAGCA
GCAGGACATGGCAGGAAGAAAATCGGAGAATTGTGGCCGCGACACCTGAC
AAACAATCCTCAGGCAAATGTAAAATTGTACATGAAAGGCTGCGTAGTCA
ATGTCTTAGAAGGCCGGCCCGCATGATCCAGAAGCAGACCATAAAAAAAA
TAAAAATTCGCGGTCTGGCAGCAGGCATAAGATGCATAGCGTTATCCTAA
ATGACATCACGATGATAAATCCTCCGCCGCATGATGCTTTTGATTTGCCT
AAGGGCCTGCCATCGTGCTGGCTCAAACTATTGAGGGTCAACATACCTTG
AAAATCCAAGTAAAAGGATGGATATCGTTATACTAAAAGCAACACAGAAA
AGGTCCACGTCAGTTCCACACAATAACATTTACGTAGTGTTCACGCGAAG
CAGTTACATCTCAACTAACATAATTGCTGGTGAGCCTACAAC
>121
TTTGGTAGAATATAGAAGAAACAGTCTAGTTTTGGCTCCGATATGAGTGG
ACAAAGCATCAAGATCTAAGGAATGCCAAGTATTTATCCAGGTTCTCCCG
AAGACTTTTCTTCAATAGCGGCGGGGGTTTTTTTTTTTTGCAGATTGCCG
AGATAGCCCGCGGCAAAGATACGTTATCTCGGTTATCGTCGGCAAGCGCT
ATTGTAACTAGATATAGGAAACTGTGGTCTGCAAAGATGCGGTATAAGGC
CTCCGTCTGTTCTTACTGCGTTATCAGCCTTTGACAGTTTTAGTTCGTCA
GGGTCTTTGACCAAATGATAAATTCCCTGGTTTACATTTTCACTAGTTTG
TTCTCGAGCAATGCTTAGTTGGCACATAAATGAGTCAGGCACTACCACTC
GGGTAACGGTCTGCGCGTTTCTTTTTGCGGCCATGAAATTTTTCAGGCGA
TGAGCTTAAAGGTA
>122
CAAAAAAAAAATAATAAGCTAAGACAATGCTATACAAGTCAATTACCAGC
CAGTAAGTCCAAATTGGAGTAGCCAATGCTATTAGTTGATAATTTTGACG
GCCGATTATACTATTCCAATTGCAGCAACATCCCTGTCCCTTAGCTTTTT
GAGGGGCCTTTTGTTATAATTTTTCATGCAGCATTCCGGTCGCCAAAGTT
GTTATCACTTCTAACGTAAATCGTTTTCTCGTTATGTCCGCTATTTTAGA
ATGAGAATAATGGATAAAATTGGCCTAAAAAGGGAGCGAGTATAACGTTA
CTGAGATACAATTGTACATTTTGCCATGGAAATGAGCCAACTAGTCTAAT
GAGATTTTCAATGCTTTATTTCTTTTTTTAGTTTCTCATTTTATTGTTTC
TCTAGTTATTAGTCCTTTGGTTATTTTTATGTCACCACCTCTTGTCACAT
GACCATTTTTGTTACTTGCTTGGTTTTACAATGATTTATACATTCTTGGG
CCTCTCTTGACATATTTTTATCGTCATAATAAGTTCTTCATTCGTTCTCT
AAAACAACAAAGTTAGACTCCATGGCCAAGTTGGTTAAGGCGTGCGACTG
TTAATCGCAAGATCGTGAGTTCAACCCTCACTGGGGTCGTTAATTTTTTA
ATTTTTCTCCTACACTGTTGCTATGTCGGAGTTATCTCATAAGAGCTGAA
AATATGTGGTAAATTTAGTCAGTATCCTTCGAGGATCAGCTAGAGCCTAT
TCAATGCAATTGTCATTAATCAGTGGCTTGGTAAGGCAATAGAATTCAGT
TATAAAATATAATATTACTAGAACAGGAGCATTATGGTATCAGCCAACGG
CGACTTGCACTTGCCAA
>123
CTTAGTATACTAAATTTGTTTCATGCTATGGTTGATATTTGAGAAATCGG
AACTTGAAGATAATAAGTTTCTTGGGCGAGGGAAAAAAACATCGGACCAT
CTTTCCTGTCGTTCTCCGGATCAGCCCTAGGAAATTTCTGGCCGGAACTC
TCCTTAGAAACAAAAAAAATTACGTAATTGGCACAACTTTACGTCAACAA
TATTCATTACATCAGAATGCGAAAAAAAAAAAGCGAGAATATCTAAGCTC
CATGACAACATTCGCTAAGCTGAAAAAATTAGGGAAATAAACTTTTCAAA
TTGCTATGATATAATTTCGTTTCTTACTATGTATTTTCTACGTATATTTT
TACACTCTTGACTCTTTCCTTTTTAGTAATGTGCCTGCCATAAAAAAAGG
GAGATGAAGGAAAGAAAATAAAAATGGTGAAAATTAAGCTTTGTTGATTA
CCTAATACAAGCTGCCTGAAACTAGAAACCATAAATTGTTTCCTATCTCG
TAATATTTTCGCCACCTTAGGCATCAATTTTCTTTGGAGAAGGGGGGTTG
CATCCCCCTGAAGAAGTGCTTGCCATGTGCTTTGAAAACTTTTAAGATGT
TACTAGTACTAATA
>124
CTTAGCATTTCGTGGCTTCTATTTCAATAGAGCGGTTCTTCCTTACAGAC
GGCGCTGTGTTGACGACTTTTCGTGTAATTCTTGTCTACGCTAATTACTT
TTTTTTCGCGATCCTGCCACACTTACACGCAGAAAACGCGAAAACCGCCA
AAATTTCGAAGGGCATACATGCGACAAGGGACGGATTCAAGCCGTGTCAC
TGAGCATGCATTCTTGCAAAGGTTCCAAGTATTTTTGCTTCCAAAACATC
AAGAGATACGGACAATACGTTTCTTATATGCAGGTAACTAAGAAATAATA
GGAGGGGTAAAGTAACTGTGGCATGATTACACTGCAGTATACTCTTTAAA
AGTTTTAAATTATTTCTATATATGTGTATAAGATATCTTCCTAGTAACCC
TAATGCGAACTTGATGCGTGAATGTATTTGCTTC
>125
CTCATATCTAAATATTCAAGTTTAACTTGTATTATTTGTCCTCAGTACAA
GAGGTGTACGGCTTTTGAAAGTCCACTCCCCCATTTTTATCCGGATCTCT
GCCGCTGGATTCTATTTTGTCACAAAGTTTGTGCCTTGGAGAGCGCCGTT
TGCCAGCCCGTCATCAGTAGGACCCTTTTGTGCGGCTGCCAAATTTTCTA
GAGATACCGCCGCGGCCGCCTCTTGTCTGGAAGAATTTGCATTGCCAAGG
AAATTGATTCAGTTCATTAAGTACAGTTGTGAAGCACTTTAGTTACTTAA
CATGAATGACAGTTTTATTAG
>126
TATATAGTGTTTTGCCCATCAGCTCAACTGTTTTAGGTGAAAATGGGAGG
CACACCAAAGAAAAATAAACAGGGCAAATTAGAGCTCCGTGGGTACAACC
GATCAGAATCACACCTATTCCCTTTTAGAGAGCGAGATAGCGAGAAAAAG
TCAAGAGCTTTTCGACATTTGCGGAAAAATTACGGGGGATGCTTACGTAC
AGCTAGGGGGCGACAGAACCCTCAAGGCATGGCCGTGCAGCACTCGCACA
GGACTTGGTGCAAGAAGTTCGGTTACTAATGAGAATGTCAACTATCGGAG
CTGCCACAACTACTAGGCAACGTCGTTTTCCAGTGGTCCCTGACATATCA
ATTGCCGCACTGTCACTGTGCGCAAATATAATAGGAAACAGAGGACCGAC
GGAGACCATATCTTTCCGCGGAAAAAGAGTCCGAGCGAAGTCCGGAAGGA
AATATGACGGAGCAAGAATGCTTCCGCGGATGTAAAAGATTGTGCTATGC
TCTGGATTGCCCTCTCGGAGAGTTTTGTTGGTTTGTTTCACTGAAGCCAT
TGATAATAAACTCTTTATTGGGTGATGACGAGGCTGAGCACCAAAAAACC
TAAAAGGAAACCAAAAGTTTAACTCATTAAATAAGTTGTGACTATATTTC
AACACGCGCTCTAATAAATATAGCCTTTC
>127
TACGTGGCCTTTTCACATAGTCTGGTCTTTCTTAATTATCACAATTCCGT
TACCCGAAATCTAATCTCGTGTTTAGCTTCGATCTGCGGACGTTACTTCT
AACGTCCAGAACACTTCACCCGCTATTTACGTTTTGATCTAGTTGCGGCC
TCCAAACCTGCAGATGAATCGTTCATTACATTCTTGCTGCCACTAGTTGG
CCGCTGCGTATACAACAAGAAATATACTATGCATTTATGTAACGCGCTTT
AGTCAGTAGCCTCAGTAATGCCTTTTCTAAGGTCAGTATGTCAATATCTC
TCGGGTGAACCCCAACATTGTTGTTCTTTCTTCGTTGTTTCTCTCTCTTA
TCATCTTCTGTGTCTTTGCTTTCTTTTGTTCACAATTT
>128
CGACCCAGATCAATAAATAAATAGGCTCGAAGACGCCTCAGAACTCCGGT
CACTGGTTTGTCTTGTTGATATACGATGTGCCAAGCGCCGTTTCTCGATG
CTTATCTGGTTTAGTTTACGCTGTTAAAACCAAAACCCCAACAGATTTTC
GACCCTAACGTATGTAGGGCTAAAATAGATATTGAGTAGGTTACAATTAA
TTATTGGCAATTGCACCTAGTGACACATTTACGAAAACGTAGGGCAAAAA
CTATTACCCGACCCAGGGCTATTTTGTGATTTTTTCCTTTTTTTTGTTTA
TGATCGCGCTTCTCGAAAAGCCAAATATCAGAAATCCCAAACACGCCTTC
ATTTGATACGATTCGTAGCCTGCGTTTCAGAGATCT
>129
GTACATTTGATTGTTGAGGTGAGAAAAAAAAAGGAAACAGAGGTGAAAAA
AATTAATAGCAAACGTTGCGTTTTGCATTTCTACTAAGAATGGAAATGTC
GCAGACACGGTATCATCTACACTGTGAAAAAGAAATGAAAATGAGAATTG
TTATTTGGCGAACTGTGAACGTGCGCAGGGCAGAATCCCATTGTACGGTT
CGTACGTGGGCACAATGAATTACTACTAGGGTAAGAAATGACCGCAGCAG
CATGAACATTCTAGAACAAAATTTGATTCCTTACCGAATGGAGAGAGGCC
ACGTTGTTAGGGGAGTAACAGCGCAATGAAGTGAGCTCAATCCCACTCCA
GAAGGGCTTGTGTACGGCCGGAACTGGGCTAAGCAGTATCCGCGGGTGAA
AGTCAAGGTCAGCTTGTTCCGGTTTCAAAAGGAAGATTTTCCGGGATACC
TCTGGGTGTAACATTCAGATGCGTGCGTCATTTATTCTCTACCCATGTGG
TGCCTGCCAGATCCGGTAAGTACCGCCCAGCATAGCGTATACACAAGGAT
GAATGGGTTCTACGACACCGCGGTTTAAGGAAGTTGCCGCATTTGGCATG
GTGTGGTGATGTCTCTTTTCCTAAACCAGACTGAGACAGGTTTATTTCAC
CGATTTTTTTTTGCTTTGGCATAATAGAATGTCCAAGAAGGGTATTTTAC
TATCTTACACGTGTTTGTAACATAAACGACAATTTTGTAGCACAACTAGG
GCATGTCAGTCTGAGTCGTATTAGCGCCCTCCCCCTTACTTCAACAGTAT
CGTAGGATTGGCATTGCATATACGCCGATTTTAGCGTTGTTAATTGATCA
TTGCTGGCTTGCCACGTGATGGCAATAGGCTTTCTCTCGTGCTCGACCCC
TAATGTCAGTTCAAGCAGGGAACGTGCCAAACATGGCTAGTGCATTTTTT
ACGTAAGCCGCAAAGAGGTTCCTCTTTTCTTAGTGTTTCGCCCTACTGAT
AAGAATGTGAAAAAGTAAACGATAAGATTAATATAATTAAAAAATGTTTC
AATTCTAGACATCGTACCCACAAAGGCTGCCCATATCATATCGTAATACA
GATCCGCTTTTCAGATTACATCCGATTTTCAGACTGAAAAGCAGCATAGC
GGCAGTATGATGAATACAAGCGCGCTTATCTGTCGCTCTTCTTACTTGGA
AAGGGAATCATATTACCCGGCAGGGCGCTGACGGGAGCCGCATTAAATAA
GCATACGAAAATCATCAAGGTTATCGGCATTTAATTTTTTAGAGGCTTCT
TTATATCCCATAGTTAGATTATTCAATCAAAAGGTTGTAAATGCCTATTA
AGTTGCCTCTTGTCATGGTCCCATATTCCCTGAGGCATTCCTGCCAAGAA
TAATGGATTTCTTTCATGCATAATTATTGAGTATTTGAATCATCTACATC
GCACCCAAAGAAATTTGATATCGTATA
>130
AAATTTCAAGGCGTTGAAATTTGTGTTGTTAAGGCAACACTATAGGAATG
AAAAATGGCCTCTCTATTATAAAGTCCTTTTGCCTTATTTTTTCGGTAGC
TGCCTACAATTTGTAACGTTAACATTCCCGGGTGAAAAGATACATGAGTA
TGTAGAGATTTGTATATATATACCTACGTAGAAAATAGAAAGGCGAATAG
CTCTGCTCCTAGTTGAATATTAGTAGCGTTCTCACATCATTAAGAGGATA
AGCCGGCATTTTATAGGGCTTTTGCAGCTAGTGTGAAACTTATGAATCGA
ACAGTCTCCACATTATCATCTA
>131
TCCGGCGTATTCCTACGAAAAAAGCAAAGAAAAATACAAAAAAACGAAAC
ATTCGCAAATGATGACAACTTGAAACCGCCAAAAGTCATCGCTTGGGAAT
TTTGAGGCAAGAGGCTGCTTCTATAAAAGTTTTCTTTACATGGCAAAAGG
GTATTCGTATTAG
>132
AACTTTGAGAAATCACAAATTGTATGGGCGTGTGGTCTAGTGGAATGATT
CTCGCTTTGGGCGATCCCCCTGATCAAACAGGAGGAACAAAGCATGCGAG
AGGCCCTGGGTTCAATTCCCAGCTCGCCCCTTTTTTTGCAACTTCGTTTT
AGACAGTTACTTAATTTTGTTTCTTAGGCACAACAATATTTATAAAAGAA
GAATGTAAGTATGACGACGAAAACGAAAAGACTAATAGTTTCATATAATA
CTAAACGATTTCAATTTTCGTTTTATATCCTTCCTATTCATAAATTTTAT
TTCGC
>133
TTTTTCATACCCTTGGTTGGTACGACAGTAAAGATTGGCAGGTTCGGAGA
TACAACTTTTTTTGAGGCTTAGAATGCTCGGCCTGCATAAAATGGCGTTA
AAGTTGCGCACAGGCCCCGGAAACCCTGCCAAGGAATATTACATAAGTTG
CAACATCTTTTTCCAATACATGGT
>134
CGTCCAATCCATACATCGCCCAATTAGGATAAAAGTAAATAACATATTCG
AGTTTTGTAAATATCCGAAAGGGGAAGACAAGGAAATATCTAGGCACCAA
ATCCCTTTTTGGAAATGCGAACCACGGGAATATGCAAAAAAAAAAAGAAA
ACAATCCCGCTTTTTCAAGATTTCAGGCCGATTTTGAGATTAAAGTTTGA
CAGCCTCAGTCTTAAAAACAAAACAGTATGACAGAACGATTCAAAGAAAC
TACGGACAAAGGATTTATGCTAAACTGGTCACGCCGTTATAGACAGCAGT
AATGCATGGAAAATCCCATGGCTATTCTAATCGGGTTTAAACTTTTTTTT
TTCAGCTGCGAATATCTCTTAGTGCAAATTGGTAAACAAGAGAGCTCACA
ACACACTAAATACGTTGTGTAACGATACATAGCCTTGCTTAGGTAA
>135
GAAAAGAACGGAAAAAAGTTCAAACAGAAAATTAAAATACAGCAGAGAAG
ACTAGGCACAACAAAGTGGGATTGTGTCTACGCTTTTAACGGTGTACCCT
TTTTCCTCGCCACGTTTTCACTCAGATCTAAATCTCTGCTGTAATTTACA
GCGGCATAAGAAGGCACGTCCCCTGAAAGTAGGCTAGCCAGAAAACAAAA
AGGCCAGAATCGGCGCGGAACTTCTCGTATCGAGAGCAAATGAGGGGTGC
GGCACACAGTAGGAAAGGGTAACTGATTAACATACGTACACCCCGGCATA
AAAGCTTCTGCAGGCTTTGTAGGCAAGAGACACTGCGGAGAATAAAAGGT
TGTGACGCCCAATACCTTCGCCGGACTCCTTCTTGGCGTTCACAAAAGAC
GATGCTGCAGCATTTTTTTCTTGCGTCGAACTCGCGCCCACAGCAACGAG
ACGGTTCCGTTCCTTCCCGTAATGTTGCTTTGATTAACAAAATTCTCGTT
TCCTCAGTTCTGTGAGCCCGTTTGTCAGCAGAGGAATCCCAATGAAGAAA
ATTTTTTCTGGAAAGTAAAAGCGAGCGAAAAGTTTAAGGTTCAGATTGCA
TCACTATTCGTTCAGTTGATAGCGAATGTAGACCGCTAGCGGCTTGATTA
GATAAATAGAGTGGGTTAAAAAAAAGGAAAAAAAAAATGTGAATTGCACA
TGCCCAGCGCGCTCGCAAAACATATAAAGTTGTCCTCACATGCGGCGTGC
ATTGTTCATAGCGGGGCAAACATACTTGTGGCTTAATTTGACACATCTAC
TTTTAATCTTTTCTTGGTCTAGTACAATGGCTTTTTCCCAAAGTAGAAGG
CTTCTTACTCCAACCGTACCCTGTCCTACTTTACTGGGCATTGAT
>136
CTTACCAAAAAGAATCAACGATGGGTATTTGTTGTTACTGACTTGAGAAC
CAGAAAAGGCATAAACCTAAGATAATGGGATGGCAGAACCGATACTAATG
AGATGAATATGAAGCTTTTTATATGCTTTTTGCAAGTGTGAGCGGACTCC
GAATACGCAACTGCGTAGATTAACCGCTGGGCTAGCTTAAATCTCCTACG
GGCACTTCTGCGGAAGCATCCGCAAGTTCTGTGCGCGCGCGTTCCTTGCA
ACGAACGGGGGGGCATTTTAATGAGTAAACAAAGATATTCCGCTGCTAAT
AACAACAAGAGACCCCCTAAGCAGTCTGCAAAACCGTGCAGGACGTGGTC
TAAGCTACTTTGATAAGATAGTCACAGGAACCTTTTTGGAAAATTAAACT
ATTACCGAAAAAAGCCACAACACAGGGCCTAGCACCAAGCATTTTCACCC
AATTCGTCATGAAAAGTCATTATTACCTTATTTCCAATTGGAGAGTTAGC
CAGGAATCTCCGCTCAGAATGAACTAGCAGTATAAAGAAAAATATACGAC
TTGGATAAAGAGGAATGCTTTAGTAAGCTACACCTCACTTTTCGATGAAA
AGGAGTTAGTGGTTGCCTTCCGTGAGCGCGAGATATTTATTTTTATGTTC
CTAAGGCGCGTGTCTACCTCGTATTTCTGCAACGCGAGCACGGTTTTCTG
TTGAGGAGTGGCTGGTAAAGGCCCTTTAAAAATACCACGCCATTTTAGTA
GGCCCTACTAACTAATTCATAGCAAAATTCAGAACTTATCCATTAGAAAT
AAATTGCGGTGCCTACGAAAAGAACGTTCCCTTGGCAAAATTAAAGAAAA
ATTAAACGTGATCGGTCTATCGAGCAGGCCATTGAAGCATATGTACAAGC
ACGGTTTGAGTGCTTAGAATTGAACAGTTATTACAGTTCTTAACACTGTT
TCTCTAAAAGTGCAAAAAAGGCACGGTCACATAGACTAATCTTGCAGCGG
TTCCAAGGCTTATTTGTTGAGTTGGGTTAGTGGAACGAAGTAGCAGTCAA
TTCCAACGTAGATCGGTATATACGTTCAAGCCCCCCTGAAAGTTGCCGAG
GCCAAATGGAGAAAATAAGTTGTTCCCCTCTTTTTATTAAGAATTAAAGT
GTTCTATTTTAGATTGATTTCCTACCATTGGTTTCAACTTCTCTCTCTGA
TTCAGTTAAGCGACGGTGTTTTTAATTCAGATTTGATTGTCCGTCTCCAT
TTTTTGGTAAGATAAGTGTGAGCAAGTTTGAGGGGTTACTACTGACTCAG
AAACCGTACTGCTATGTAGTACTTGCCTTCGTCCTACCTAGTAACTATTA
TTTCTACCTAGGAAACATTTTAGGGTATGATCTACCCCATTGCGGGGTGC
CTTTTTCTTACGTTAGCGAGTACTCGAATGAGGGTGAAATGGCATCGTCA
TTGATTGCCGAGGACAGACTCCCCAACATTGAGGTGTTTATGGTTGGCCT
TACTGATAAACCATAAAAATACGGTCCGATATGTGTAGTGGTTCCGTTAT
ATTTTTGGCATGGTAAGCATGTATAGGTATATGCTACATTCAATTATCTG
GAAAGGCGGTTTTTTAAGCTCATTTTCTTTTTTGAGCTTATTCTTGAAGA
TAATGCTATCACACGTGCATAATAAAATAGTAGCTTTTTCT
>137
AATATCACGAGCTTTGTAAGACAGTTGAACATTTACGGCTTTCACAAGGT
GTCGCATGATCATAGCAGCAACGACGCTAATAGTGGCGACGACGCCAATA
CTAATGATGACAGCAATACTCACGATGATAATAGTGGCAACAAAAACAGT
AGTGGCGACGAAAATACCGGTGGCGGTGTCCAAGAAAAGGAGAAAAGTAA
CCCCACTAAAATCTGGGAATTTAAGCATAGTTCTGGTATTTTCAAGAAAG
GTGACATTGAGGGACTCAAACACATTAAGAGAAGAGCTTCTTCCCGTAAT
AACTCCTCAATTAACAGTCGAAAGAATTCTAGTAATCAAAACTACGATAT
AGATTCCGGTGCAAGAGTAAGACCCTCTTCGATTCAAGACCCGTCCACCA
GTTCCAATTCCTTTGGTAATTTCGTTCCGCAAATTCCGGGCGCCAATAAC
TCTATCCCCGAGTACTTTAATAACTCTCATGTAACTTACGAAAACGCAAA
CCATGCCCCGCTGGAATCCAATAACCCGGAAATGCAAGAGCAAAACAGAC
CTCCGAACTTTCAAGATGAAACACTGAAACATTTGAAAGAAATAAATTTT
GATATGGTTAAGATTATAGAGTCTATGCAGCATTTCATATCTTTGCAACA
CAGTTTTTGTTCACAGAGTTTCACCTTCAAGAATGTGAGCAAGAAAAAAT
CGGAAAATATCGTGAAGGATCACCAAAAGCAACTTCAGGCATTCGAAAGC
GATATGTTAACTTTCAAACAGCACGTCATGTCGAGGGCCCACCGTACAAT
AGATTCTCTTTGTGCTGTAAATGCTGCCGCTACCGCTGCCTCTGTCGCCC
CTGCACCCGCGCCCACATCCACATCTGCATATGCACCCAAATCTCAGTAT
GAGATGATGGTTCCTCCAGGGAACCAGTATGTCCCGCAGAAATCTTCCTC
GACCACGAACATCCCTTCGAGATTCAACACGGCTTCAGTGCCGCCCTCGC
AACTTTTGTACAATACCAACCGCAGTCGCAACCAACATGTGACTTATGCG
AGCGAACCGGCACATGTACCAAACTTTATCAATCAGCCGATACCCATCCA
ACAACTACCTCCACAATATGCAGACACTTTTAGCACTCCACAAATGATGC
ACAATCCTTTTGCCTCGAAAAATAACAACAAACCGGGCAACACGAAGAGG
ACCAATAGTGTTCTCATGGACCCGCTGACTCCCGCAGCGAGTGTTGGAGT
TCAGGGTCCACTAAACTA
>138
CTGCTCCTAGTTACGATTTTTGCCTAGTACTCCTTCCTACCCTCTTCCTC
ATAGATTTAATGCCAATAAAATTTTCTTTGCATGTCACCATTGGGATCGG
TGAGGCAACTCCGGTTCCGATTTTTTTTTTTTCAGCGCCGTGGTATTTCC
GCTCGGGAAATCCCCTCCCGCATTGCGTCAGAGCTTATCGATGTAAAGTT
AATTTCCCTTTTTTTCGGTTGGGCTGGAGCACTTGGTTGCATTACTAACA
AATTAACGAACAATAGTTTTAAAAGCAAGTGCCTTAAGATTTAGGTCATT
CCTTCGAGGATTTCTGGGAACAATTTAAAGAATAACAGAAACTTTTGCGG
CCCTTTTCATCATCTACGTGTTTTGTAAGAATGAGATCACATTCCACGTA
GCCCTAAACATTGGCGTACATTTCCACTCGGAACCTTTTCTCGACCCCTC
TCCGTACGCCAAGTTTTACCTTGAGGAGTAAGTCGTCAAAGGGGCGTGGG
GCAGCCATTTCTTAGGAGGTGGGAAGACATGGCAGTGAGTGGGCCCTATG
ATTGCTGCTGCAGGGGACTTTTCAGGATAATCATGTAAACGATAAAACGG
AAAAACAAAACTACGGACGTTGTTACCTTTCCATTTTGAAATGTTTCTCC
GAAAAAATACCATTTTGCACAGTTCAACATTCTTGATGGCAAAAGCGAAG
CATTGCGTCAACGGGTTAGATAAGTCATTTACTGTCAATTAGTACCAATA
CCTGTCTTTGCTCACCGAATGGCACTATACAGTGACGTTAAGATCTTGTA
GTTGTTTTTCAAGAAGGCACTAAATAAGGTAATATATGGTGCCTTTCGCA
ATGACTCGTGTATCTGGCAGATCTATAGCTGCACACCTGATTTTTTTGCT
ATATTTGAATCAGGAGTAAGTTTGAACCATAATCA
>139
TTTTATGTCTCATCTCACGATCCTGGCAAAAAAAGAAAGGCATGTAATTT
GAGGAGGCGATTCACCCTCATTTTTACGCAACAACAATGCTGTGTGGCTT
ACACGCCTCTGCGTACATATCTACATATTTAACGGTCCTGTATTTTCAAG
CACGCAAGGCTGAAATAAACGGTTGTTTGCTTATGCGCGATGCACTCCGC
CGAACATCACCGCAAAAGCACCGTAGGCGGAGATCTCCCAGCTAGTATGG
GCATGACGGAACCACGATTTCCAGATATAGATACTTAAAAGCACTAAAAG
GTCTATACATAAAACGCAGACTTACGTAAGATACATAGCAACTGCCGATA
TGGACGCCGCCATGCCGAATGACAAAGGGAGAATGTAGTACTAATTGATA
TCGTCTTATCCTCTCAGGAATGCAAACTTAAAACATACTTTCTCCCGTCC
TAACAACGCCGGTTGTCGACGATAAATACCCCAAGAAATGCCCGCACAGA
ATCTCCTCCGTTAGGTGGTCATGCCCCGAGGGTGCGAGGTTGTTTCCTGC
ACGGTAAATCGGGATGCCATGAAAGCCGGCCCTCCCCACGCGTCCCCTAA
TTTTTTTCCAAGTGAATATCTGCATCGGCCACCGTTTTATATTACTTCGA
TAAGCTTGCCTTAAACTCATTATTGCCGTCGTTTATCCCTCAAAGCTTAA
TCTTACAAGAATTAGAAAGAAGAAAAGTTTATTCGTATAGACTTCCTTAT
GCCTGATGTCCTTCCACCCTCTTACACAGTAGGATTAGTCTAGAAGTGGT
AAATTGCAGGATAGCATATACGCGACAAGGAAAAGAAAGAAGGAAAAATA
TTTTACGTCGGAAATTGTGTGATATGCCGTTTGAATTCGAGGTATATTAA
GCGCAGTGCTTTTCCCTGCATCGCATTCTGTCTGTTCTTCCGAGTGTCGA
TTCCCACAATTCGTCTTGTCCTTTTGATATTTTGTTTTTTTTTTCCTTCT
CTTTTTTTATTCTTTGTATTTGGTGCTGTCTGTCAATACGGCACATAAAG
TAACATGTAATTAACTATAACATGTCTTCGAACGATTCGAACGATACCGA
CAAGCAACATACACGTCTGGATCCTACCGGTGTGGACGACGCCTACATCC
CTCCGGAGCAGCCGGAAACAAAGCACCATCGCTTTAAAATCTCTAGGGAC
ACCCTGAGAGACCACTTTATCGCTGCGGTCGGTGAGTTCTGCGGCACATT
CATGTTTTTATGGTGCGCTTACGTTATCTGCAATGTCGCTAACCATGATG
TCGCACTCGTTGCAGCGCCTGACGGTTCCCATCCGGGTCAATTGATTATG
ATTGCCATCGGTTTCGGATTTTCCGTCATGTTTTCTATCTGGTGTTTTGC
CGGTGTCTCTGGTGGGGCTTTGAATCCTGCTATGTCGCTTTCGCTGTGCT
TGGCGAGAGCCGTCTCTCCTACAAGATGTGTCGTTATGTGGGTTTCGCAG
ATTGTTGCTGGAATGGCCGCTGGAGGCGCTGCAAGCGCCATGACACCTGG
TGAAGTCCTCTTTGCCAATTCTTTGGGCCTGGGCTGCTCTAGGACGAGGG
GTCTGTTCCTGGAGATGTTCGGCACCGCTATCCTATGTTTAACAGTCTTA
ATGACGGCTGTGGAGAAGCGTGAAACCAACTTTATGGCTGCGCTGCCCAT
CGGCATCTCCCTGTTTATCGCACACGTCGCTTTGACTGCATACACAGGCA
CAGGTGTCAACCCTGCGAGGTCCTTGGGTGCTGCTGTCGCAGCCAGATAC
TTCCCTCATTACCACTGGATTTATTGGATTGGCACGCTG
>140
AACCCTGACAGGCATATAAAAGAGGTATTTTGAAACATCAACATGTAGTA
GTCACATATATAGCAAAATAGTAAGTAAGGAAAAAAAGAAGGCACAGAGA
ATACAACAATAATGATGAAGGCACACGACTGCCCTTTCCGGGCCACCTGC
AGATCTGTAAGGTAGTTCAAATGACGTTCTCGCGCGGGTTTCTTACTTAT
GAAACTTTAGGGACATAAGTCGGGAACCTGATGCATCATTCTTTATCTTG
TTTTTTGTTGTTGTTTGAGTTTCTTGTACAGAATAATACGCAGAATTAAA
GCGGAAGTTAAAAAACAGATCGTCTTGATCTGCCCTCAAAACCAGTATCC
ACTGAAAACCTTATTTCCCACCGTAAATGGCAATCACTCGTAGCTCAAGG
TGGAATGCTCCCGTAAGGATATTTCCTATATGAGATAGTCCCGATCCTGA
GAAGAGGGATCGCCGTCATTTTATTCTTTAACCCCGAGAAACGGCATCTC
TCACCTGATTGTTCTCAAGATTGCTGCAAAACCCAGATATACTTTTAGGT
ACGGAGCGTACGCGATGTATATGGATTGATTTTCACATGTATCGTTTATG
AGTACTTGACTGCACCTCGTGTCGGAAGATTTTCCAATCGGGCTTTTTTT
CAATCTTGAAGGCCCTCCTTTTCATTTCCATTTGCTCTGACATTGCGGCT
ATGCATCACAGGCAAAAGCTGAAAAGGAAATTTTGTAGCGTATCGGTTTA
CTGCACAGTCTCAGACCCTTTGTAGTACTGTTACCTGGAAGAATAGTAGG
TGCGTACAACAGTGATTATGTAGTAGTATCTACTGAAGAGCCTACGAGCG
AAAAAAAAAAAAATTATCGGCTACATTACGTTGTTTCCTACGGAGACAAG
AACCAATATAAGCTGCAAAAAATCTATGAGCATTTTAAGTTTCCGATACA
ACAAGATGTATGCGTACTATTCACGTCGTGTTATATTGCTCACGTAACAA
CTTCTATGACAATAATAAAAAATAACCTTTCCATTGTATCATTAAGGTTA
TCTACGGAGGATTGTCAAACCTAGCGGATATGAAATGTACTTGATTCCTA
ATTCGGGTTTATTTAGAGTTCAGACTATGTGGGTCATTTCTTATGCTAAT
AATAGGCACTGAGGTAAGTCAAAATAGCGACACTCAATTA
>141
AGCCTTACCCGTAACTTCTTGCATATCTGCTTTGCCAATATTTTTTTTTA
AAGTTATTTCTTAAACTACTCCTCGTGCTGTCCACATTTTTACCCGTTAG
TTGTTAGACAAAAAAAAAGCGCAACTATCTCCCTTTTGCGCATCTCCCAA
GTCCTTTACCAAATATATTAGAAGAATGACACCCGGCCGAGACGGATGAA
GCGGCCGTCTCGGCCGCCTTAGGAAGGGATCTGCGTTTTTGTTCGTTAAT
GAGGTAATCAAGGGCGTACTTGGTAGAACGGTACTAAGTTAATCATTGCT
GCTCTCCCTCAAAATTACTCAAAGAATAGAGTGTCTATTGAACCGTAGAA
TAGGCATTTATTATATAAGGGGTTGTCAATTTACCAAATTTTTTACTTCA
TC
>142
TCACAAAATATTACATATTCTAATTCTACAATTATAGATATCAAACTTGA
TAAATTTAGTAGCAAATATGAAGTATTATTATGCATTTCAAAAAATTCCA
TTGTCCCTTCTCTTGGGCGCTTGAATTCTAAAAAAAATTAGCGCATCGCT
AATAGCGCGTTTGAACCCGTCTTAAGAATGTTCATACCAGTATCAACAAG
GGGTATGTTCCTCAGCATTATCTGAAGGTACTCCTCTAAATTTTTAAGTA
AGAAAAGGCGTATAGTCATATAATTGTTGGGAATCCACCACTGATAAAGG
TTATAATATCAGGTAAAGAAATTGTTGGAATAAAAATCCACTATCGTCTA
TCAACTAATAGTTATATTATCAATATATTATCATATACGGTGTTAAGAT
>143
ACAATTATAATTTTGTAATTTGAAATATCTACCAATGAGGTCAAAAGAGC
GACAACAACTAGCGCTTATATAATATAAAGAATTCTTGGGACTGTATCTC
ATGGCAACCAAATGCCGTTCATATTTAGGGTTTCAGTGGGAAAAGATTTC
CGGTGCTTTACGCTCCTTGTACAAACAAGTGCTGCGAAACTTTCTGTGGA
AATCGTGCCTTTTAAACCATTAGTGAAGGCTCCAGATAGAGTTGTCACAG
AAAACAGCGTGGCGGACTTATTTTTTTGCAACGATTTTCTGGAAACAATA
GAGGAAGAATTTTTGGCGTACGAAAAGGAACGATGCCCCCAACACCTCAA
CAATACTACGGAAGTTTCTTCGAGCGGAAAAACATCGAAATACTAGCTGT
TTCTGGATATGAGAGTGGGTATGCGTGGCAATGGAACTCAGGGAGTTGTT
GCTATTTCAGTGAGTACGATGGATCAGGGTGTTTATATCTCAAGAACT
>144
ACATAAAGGCTAAAACAAGAATGCCTGATACCGTTCTGCTTTTTGTTTTA
TCTTTCCCTATATTTTCTTTCCCTTTTGATGCTTTACGTAATTTTTCCCG
GCATATGTGAGCTTCCTAATAGACTCTATTTTTATTTTTCCCTTTCAAAG
TGCGAGAGAAATACACACAACCAGCCTACGCTTATTTTCACCCATACCGT
CATACGCCATATGATATATAATGTGAAACAAACGCGGGGAAGAGCGCGAC
ACGACAGCTTAGCAGGGGCATTCCACGCAACACCTGAAACTTTAAGTAAA
ACTGTTTCTGCGAGGATATCTTGGCAAAACAAACACTAACTTTCGAACTA
AATATAGTGATCGTGGTCATAAATTAATAAAAAGAGGATAAATAGAGATA
AAAGAGATATGTGACTAAGTTG
>145
GGATGCAAGAACACCAATATTGGATTAGCGCAATCAAGAACATGATTTCC
TTCGGATAAGCAAGGGAGGGGTACGACTTCTGCCCGCAGGGGCTTATTGC
CTGTCCTCTTCCTCGACCCCACGGTATTTCATTATATATAGAGTCACTGT
AATAATAATTATCATGAAACCTGACAAGCAAAGGCGTCGGGCAATTACCA
AAGGGCAGTTCGGTCGATTAAGTTTGCTTCACTACAGATTATTCACATAT
CATACGACAACTTTAAAATTGAACATTCAGGAGATTTTTGAATGCATTGA
TGGGCCCTTGCACCTTAACCGGGTCCCAATATTAGAGAAACGCCCCCTTA
AACTGAACACAAGACAATACTACCTGGCCAATAGGGTACAATTTGCGGCC
GTGTTAAACAGGCGTTTCAGCGTCTACCGCTCCTAATTTAAAGTCACTTG
TTTCTTGGTAGCAGCAGCTTCCTGTTTTCTTCTTTTTGGCACTTGGTTAT
GTGATAATATCACCCGGATGAGA
>146
AAAAGTGCATTTTACTTTCTACAATTCACCACAGTCTTCGAGATATATTT
ATCATTTAAATCACATGGACACCCACCGAACTGGTTACAAGCTATATTCG
CATCACACAGAATGATGTGGCGTCTATGCTATACGGCGATGTTACTATAT
CATTAACCTCTCTTTTCGGTTCCGAGCGCTTTCGGCTCAAGAACTGGGGA
TGACTAAAAAAAAAGAACTGTGTACGTGATTTCTTTGTCCCCTGCGGTTG
CATAGACATCGCTGTCGCACGGCAAGAGCGCACACAGTCATCAGTCTACA
AAACCTAACTTTTCAAGAGCAACCAGTATAAATATTTTGAGCCATTGAGG
GCATAAAGCGAAAGGCACATTTTCAAAATTGGTCTTAGGTTCATCTTCTG
ATGTTAT
>147
TTTTCAGAAAACGAACGTAACCAGTTTGATAAATGTGGTGCCTCTCTTAT
TCGGCCTGGGAAGCAGTGCAACAATAGCGCACATTATAATCATTTGATTT
TAAATTCACCCCAGGACAATGGGGCATTATTTTCTGTTGAGAGGGTAACG
CGTTGTTTATTGAGAACTTAACGCGTTTCGATTTCAAGAATGCACTATAG
TGCGGAAATGTAAACAGAATTTATTGATACTTGGCATTATTTGAATTTTA
TTTATATCTTGCCCGAACATGTCTTGACACAAGCAAGGAACGTTTGCTCA
TTAACCTTTTACACGGTTATGCTTGTACCAAAGGCTGATCACCTGGTTCG
GGCACAAAACAGAGTTT
>148
AAGATGGTGAAGGACAAGAAATAGAAAAATTTTGGAACAACGACACAAGT
CCGATTGTTCCTCTTCAGGAGCTTCCTGAACCAAACTTTTTCCGCAAGGC
CGCATTTTGAACCGTATTTTGCTCGTTCCAGCCTTTCCACGTTTTTGTTA
TCTAAGCAACTTGGCACATTTCCCTACTATACTACAAACCGATACGTAAA
TACTTCCCTAAATAGCATATGAATTATTCAGTAATTTTTAAGGATCGAAA
CTGCACCTCAACTATTCGTTACTGTGGTTATGTTCTCATGTATTGATGCA
AATCATGGGATATTTGCTCAAGACGACGGTAAAATGAGCAAAAATGGCAC
GATCCTGAAAAGAG
>149
GAAAAGAACCGTGATCAGCAACAGCAGTGTACCAGATTTTGTGATCTGAT
TTATTATAGATTTACTCGATGACCTGAACTTGAATTATATTTAAATCGAT
GAAGGGGTTGAAACAGGTGTTGATCTGGGTTTCAGAATTTTTCTCTTGTT
TACCTTTTTTGCTGTTCTACACTCATTCTTTCGATTGTTTTCAATTGCTT
TTTTAGGAAGTGCGGCTTTGTTTACATAAAAGGTGTGCGGCATTTTAATG
CAATATGAAATTTAAAAGTATATGTAACGATAGC
